# Supplementary material for: Design, Synthesis, In Silico and In Vitro Studies for New Nitric Oxide-Releasing Indomethacin Derivatives with 1,3,4-Oxadiazole-2-thiol Scaffold
Source: MDPI journal article supplement (doi:10.3390/ijms22137079), 2021-06-30
Supplement: s1 [file s1]

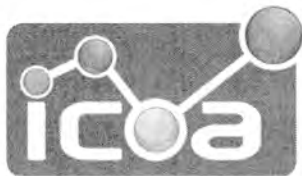

# Spectrométrie de Masse

## Demande d'analyse HRMS

### High-Resolution Mass Spectrometry analysis request form

|                                                                                                                               |                                                                                                    |                                                                                        |
|-------------------------------------------------------------------------------------------------------------------------------|----------------------------------------------------------------------------------------------------|----------------------------------------------------------------------------------------|
| Demandeur (Nom+Prénom) :<br><b>Sava Alexandru</b><br>(Submitter's name) : <b>AS</b>                                           | Tél :<br>(Phone)                                                                                   | Mail :<br>(E-mail)                                                                     |
| Nom de l'échantillon : <b>AS 250</b><br>(Sample name) <b>3a</b>                                                               | Confirmation :<br><input checked="" type="checkbox"/> Structure connue<br>(Known structure)        | Identification :<br><input type="checkbox"/> Structure inconnue<br>(Unknown structure) |
| Formule brute : $C_9H_{11}BrO_2$<br>(Molecular formula)                                                                       | Structure :<br>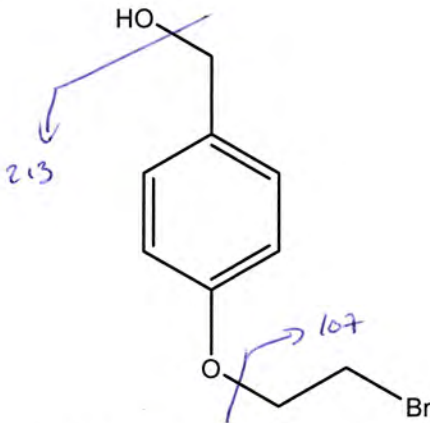 |                                                                                        |
| Masse moléculaire : 231,09<br>(Molecular weight)                                                                              | Chemical Formula: $C_9H_{11}BrO_2$<br>Molecular Weight: 231.09<br>(Chemical structure)             |                                                                                        |
| Solvant conseillé : $CH_3OH$<br>(Recommended solvent)                                                                         |                                                                                                    |                                                                                        |
| Concentration ou masse :<br>(Concentration or weight)<br><b>1 mg / 1mL</b>                                                    |                                                                                                    |                                                                                        |
| Remarques (conservation, solvants déconseillés, toxicité...) :<br>(Notes: storage, sample handling precautions, toxicity ...) |                                                                                                    |                                                                                        |
| Responsable : Sylvain Routier<br>(Supervisor)                                                                                 | Date : 06.03.2018<br>(Date)                                                                        | Bon pour accord :<br>(Signed as agreed)                                                |

#### Partie réservée au service (For MS facility use only)

|                                                             |                                                   |                                    |
|-------------------------------------------------------------|---------------------------------------------------|------------------------------------|
| Position sur le rack :<br>(Position on the rack) <b>GD4</b> | Nom du fichier :<br>(File name) <b>X048788CYC</b> | Date :<br>(Date) <b>13/03/2019</b> |
| Remarques :<br>(Comments and suggestions)                   |                                                   |                                    |

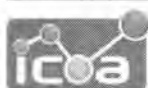

## Analysis Info

Sample Name **AS250**  
Analysis Name X048788CYC\_Na.d

Acquisition Date 13/03/2019 20:27:42  
Instrument / Ser# maXis 255552.00086  
Method positif-6.m

## Acquisition Parameter

|             |          |                       |            |                |           |
|-------------|----------|-----------------------|------------|----------------|-----------|
| Source Type | ESI      | Ion Polarity          | Positive   | Set Nebulizer  | 0.6 Bar   |
| Scan Begin  | 50 m/z   | Set Capillary         | 4500 V     | Set Dry Heater | 200 °C    |
| Scan End    | 2500 m/z | Set Collision Cell RF | 1800.0 Vpp | Set Dry Gas    | 7.0 l/min |

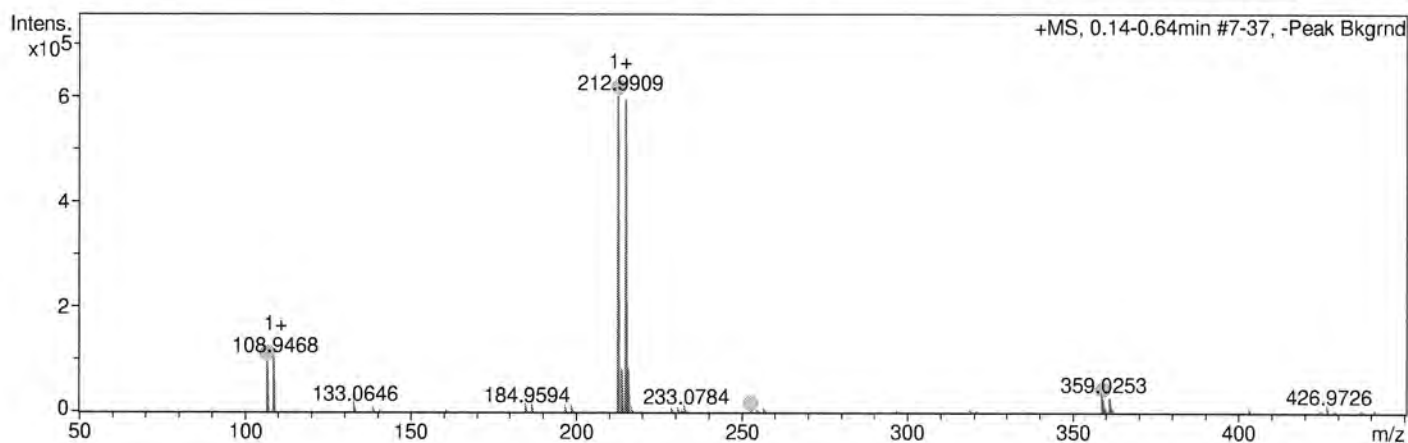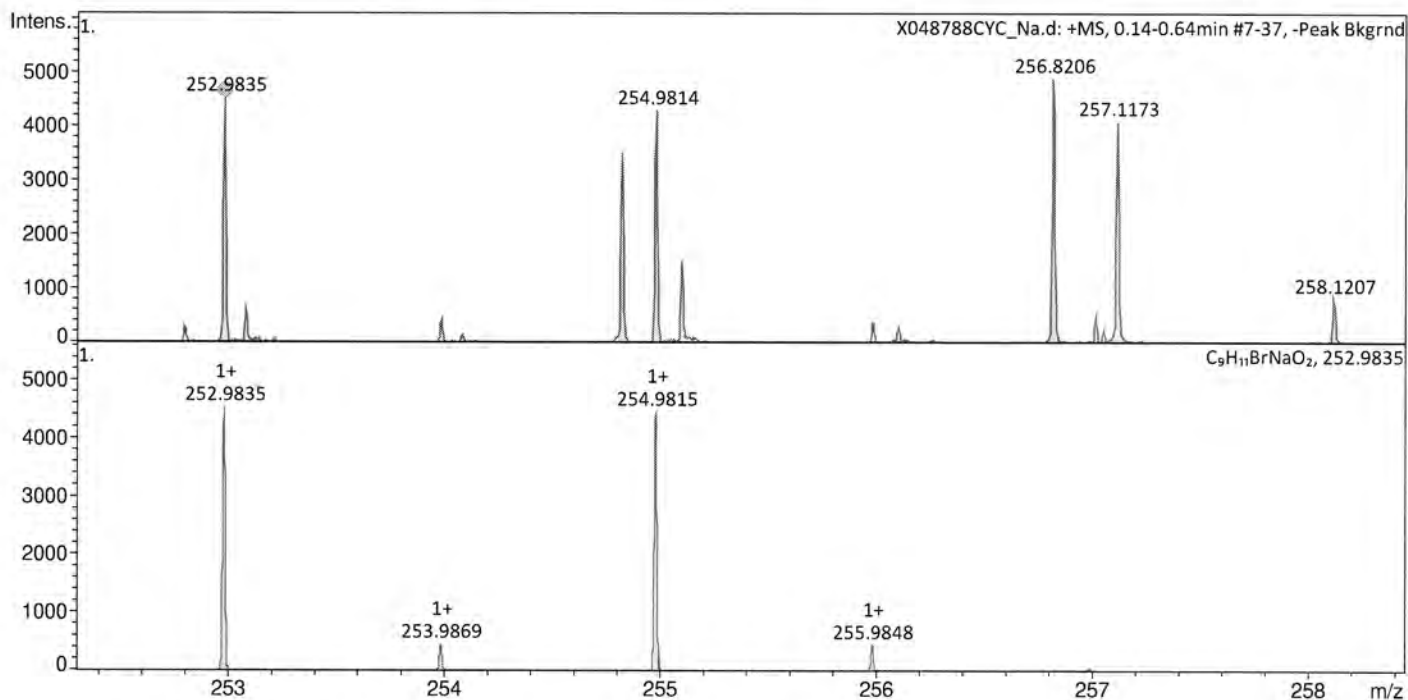

| Meas. m/z  | z  | # | Ion Formula  | m/z        | err [ppm] | mSigma | rdb | e <sup>-</sup> | Conf |
|------------|----|---|--------------|------------|-----------|--------|-----|----------------|------|
| 106.948832 | 1+ | 1 | C2H4Br       | 106.949089 | 2.4       | 29.1   | 1.0 | even           |      |
| 212.990920 | 1+ | 1 | C9H10BrO     | 212.990953 | 0.2       | 30.7   | 5.0 | even           |      |
| 252.983492 | 1+ | 1 | C9H11BrNaO2  | 252.983462 | -0.1      | 71.6   | 4.0 | even           |      |
| 359.025295 | 1+ | 1 | C16H17BrNaO3 | 359.025327 | 0.1       | 7.1    | 8.0 | even           |      |

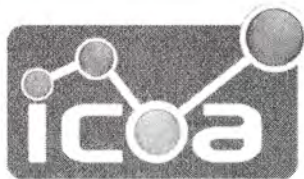

# Spectrométrie de Masse

## Demande d'analyse HRMS

### High-Resolution Mass Spectrometry analysis request form

|                                                                                                                               |                                                                                                            |                                                                                        |
|-------------------------------------------------------------------------------------------------------------------------------|------------------------------------------------------------------------------------------------------------|----------------------------------------------------------------------------------------|
| Demandeur (Nom+Prénom) :<br><b>Sava Alexandru</b><br>(Submitter's name) : <b>AS</b>                                           | Tél :<br>(Phone)                                                                                           | Mail :<br>(E-mail)                                                                     |
| Nom de l'échantillon : <b>AS 378</b><br>(Sample name) <b>3b</b>                                                               | Confirmation :<br><input checked="" type="checkbox"/> Structure connue<br>(Known structure)                | Identification :<br><input type="checkbox"/> Structure inconnue<br>(Unknown structure) |
| Formule brute : <b>C<sub>9</sub>H<sub>10</sub>BrFO<sub>2</sub></b><br>(Molecular formula)                                     | Structure : (Chemical structure)                                                                           |                                                                                        |
| Masse moléculaire : <b>249,08</b><br>(Molecular weight)                                                                       | <p>Chemical Formula: C<sub>9</sub>H<sub>10</sub>BrFO<sub>2</sub><br/>         Molecular Weight: 249.08</p> |                                                                                        |
| Solvant conseillé : <b>CH<sub>3</sub>OH</b><br>(Recommended solvent)                                                          |                                                                                                            |                                                                                        |
| Concentration ou masse :<br>(Concentration or weight)<br><b>1 mg / 1mL</b>                                                    |                                                                                                            |                                                                                        |
| Remarques (conservation, solvants déconseillés, toxicité...) :<br>(Notes: storage, sample handling precautions, toxicity ...) |                                                                                                            |                                                                                        |
| Responsable : <b>Sylvain Routier</b><br>(Supervisor)                                                                          | Date : <b>10.12.2019</b><br>(Date)                                                                         | Bon pour accord :<br>(Signed as agreed)                                                |

#### Partie réservée au service (For MS facility use only)

|                                                              |                                                   |                                    |
|--------------------------------------------------------------|---------------------------------------------------|------------------------------------|
| Position sur le rack :<br>(Position on the rack) <b>GB11</b> | Nom du fichier :<br>(File name) <b>X053942CYC</b> | Date :<br>(Date) <b>10/12/2019</b> |
| Remarques :<br>(Comments and suggestions)                    |                                                   |                                    |

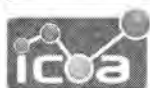

Analysis Info

Sample Name **AS378**  
Analysis Name X053942CYC\_Na.d

Acquisition Date 11/12/2019 20:25:07  
Instrument / Ser# maXis 255552.00086  
Method Positif.m

Acquisition Parameter

|             |          |                       |            |                |           |
|-------------|----------|-----------------------|------------|----------------|-----------|
| Source Type | ESI      | Ion Polarity          | Positive   | Set Nebulizer  | 0.6 Bar   |
| Scan Begin  | 50 m/z   | Set Capillary         | 4500 V     | Set Dry Heater | 200 °C    |
| Scan End    | 2500 m/z | Set Collision Cell RF | 1800.0 Vpp | Set Dry Gas    | 7.0 l/min |

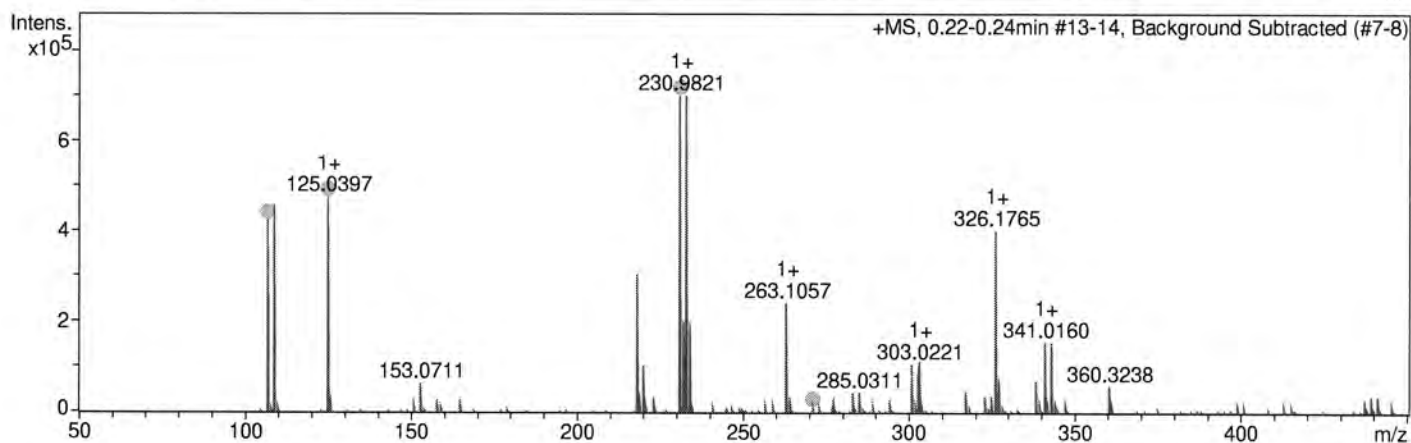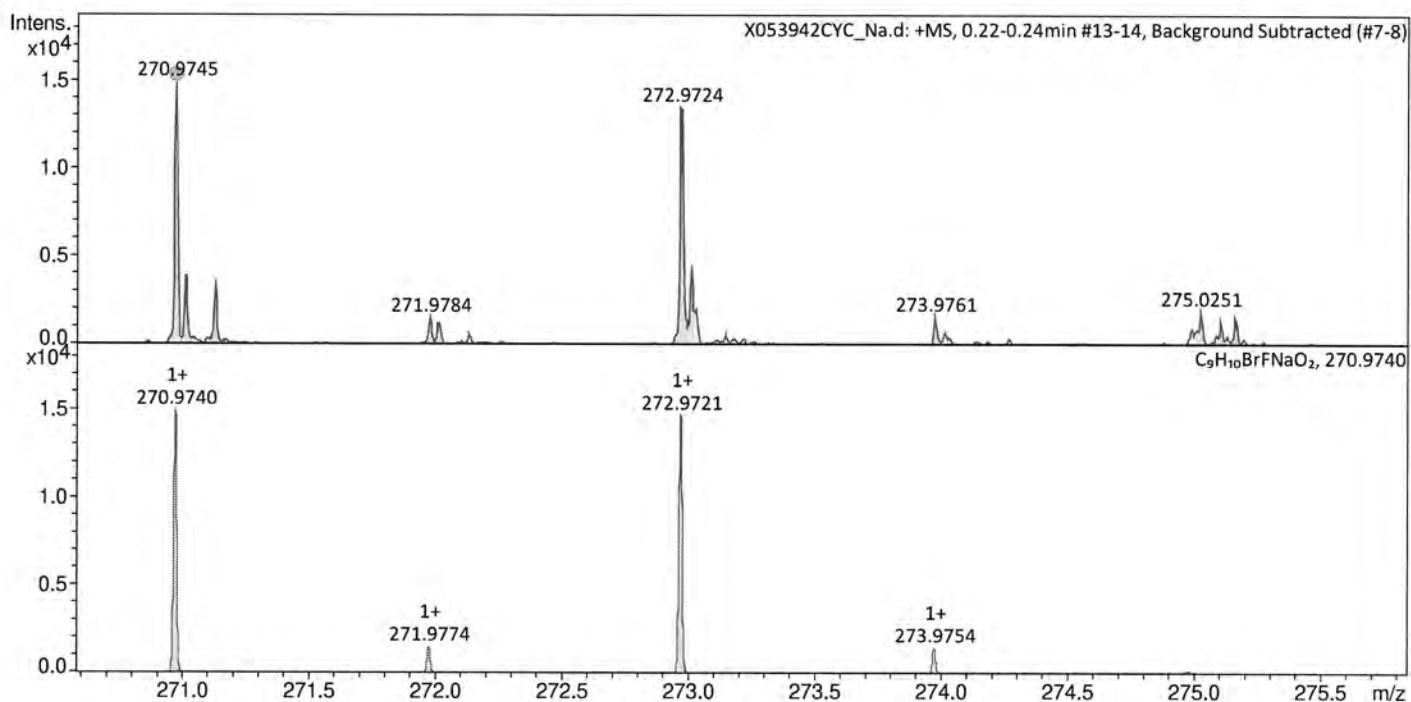

| Meas. m/z  | z  | # | Ion Formula  | m/z        | err [ppm] | mSigma | rdb | e <sup>-</sup> | Conf |
|------------|----|---|--------------|------------|-----------|--------|-----|----------------|------|
| 106.948928 | 1+ | 1 | C2H4Br       | 106.949089 | 1.5       | 39.3   | 1.0 | even           |      |
| 125.039736 | 1+ | 1 | C7H6FO       | 125.039719 | -0.1      | 2.6    | 5.0 | even           |      |
| 230.982066 | 1+ | 1 | C9H9BrFO     | 230.981532 | -2.3      | 134.2  | 5.0 | even           |      |
| 270.974533 | 1+ | 1 | C9H10BrFNaO2 | 270.974041 | -1.8      | 39.2   | 4.0 | even           |      |

## High-Resolution Mass Spectrometry analysis request form

Plate-forme de Spectrométrie de Masse Haute Résolution – Fédération de Recherche Physique et Chimie du Vivant (FR2708 : CBM/ICOA)

|                                                                                     |                                                                                                                               |                                                                                        |
|-------------------------------------------------------------------------------------|-------------------------------------------------------------------------------------------------------------------------------|----------------------------------------------------------------------------------------|
| Demandeur (Nom+Prénom) :<br><b>Sava Alexandru</b><br>(Submitter's name) : <b>AS</b> | Tél :<br>(Phone)                                                                                                              | Mail :<br>(E-mail)                                                                     |
| Nom de l'échantillon : <b>AS 363</b><br>(Sample name) <b>3c</b>                     | Confirmation :<br><input checked="" type="checkbox"/> Structure connue<br>(Known structure)                                   | Identification :<br><input type="checkbox"/> Structure inconnue<br>(Unknown structure) |
| Formule brute : $C_9H_{10}BrClO_2$<br>(Molecular formula)                           | Structure :(Chemical structure)                                                                                               |                                                                                        |
| Masse moléculaire : 265,53<br>(Molecular weight)                                    | 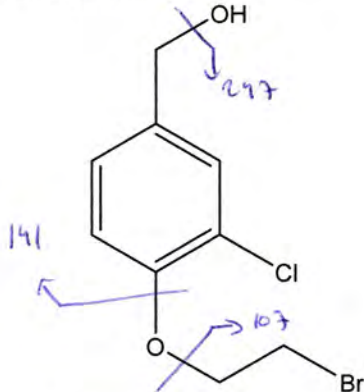                                            |                                                                                        |
| Solvant conseillé : $CH_3OH$<br>(Recommended solvent)                               | Chemical Formula: $C_9H_{10}BrClO_2$<br>Molecular Weight: 265.53                                                              |                                                                                        |
| Concentration ou masse :<br>(Concentration or weight)<br><b>1 mg / 1mL</b>          | Remarques (conservation, solvants déconseillés, toxicité...) :<br>(Notes: storage, sample handling precautions, toxicity ...) |                                                                                        |
| Responsable : Sylvain Routier<br>(Supervisor)                                       | Date : 10.12.2019<br>(Date)                                                                                                   | Bon pour accord :<br>(Signed as agreed)                                                |

| Partie réservée au service<br>(For MS facility use only)                                       |                                                   |                                    |
|------------------------------------------------------------------------------------------------|---------------------------------------------------|------------------------------------|
| Position sur le rack :<br>(Position on the rack) <b>GA8</b>                                    | Nom du fichier :<br>(File name) <b>X053927CYC</b> | Date :<br>(Date) <b>10/12/2019</b> |
| Remarques :<br>(Comments and suggestions)                                                      |                                                   |                                    |
| <p> <i>expected compound = "small" 286,9 m/z</i><br/> <i>m/z (338, 360) : contaminant</i> </p> |                                                   |                                    |

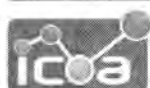

Analysis Info

Sample Name **AS363**  
Analysis Name X053927CYC\_Na.d

Acquisition Date 11/12/2019 20:20:29  
Instrument / Ser# maXis 255552.00086  
Method Positif.m

Acquisition Parameter

|             |          |                       |            |                |           |
|-------------|----------|-----------------------|------------|----------------|-----------|
| Source Type | ESI      | Ion Polarity          | Positive   | Set Nebulizer  | 0.6 Bar   |
| Scan Begin  | 50 m/z   | Set Capillary         | 4500 V     | Set Dry Heater | 200 °C    |
| Scan End    | 2500 m/z | Set Collision Cell RF | 1800.0 Vpp | Set Dry Gas    | 7.0 l/min |

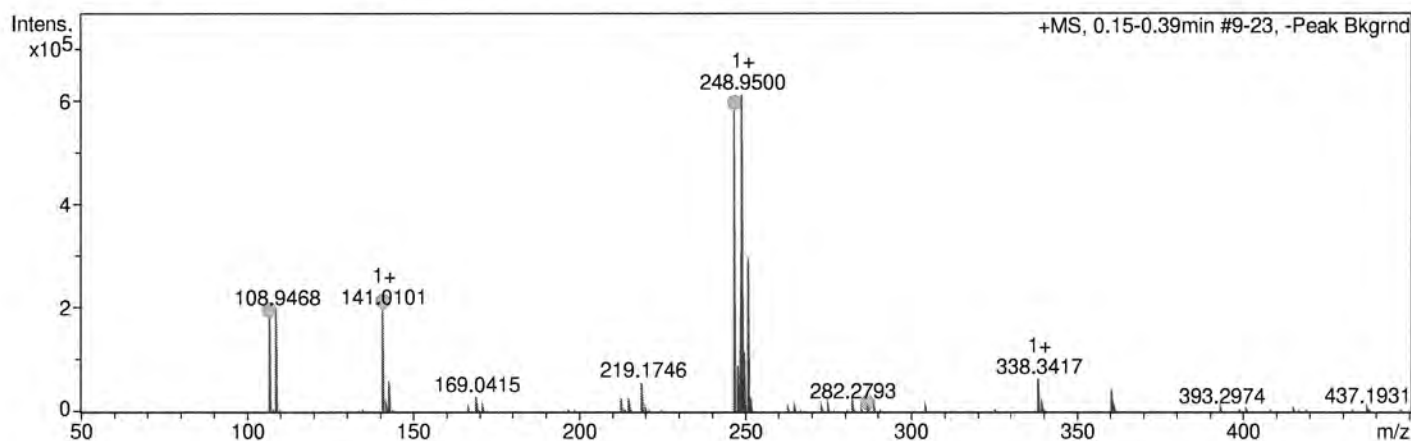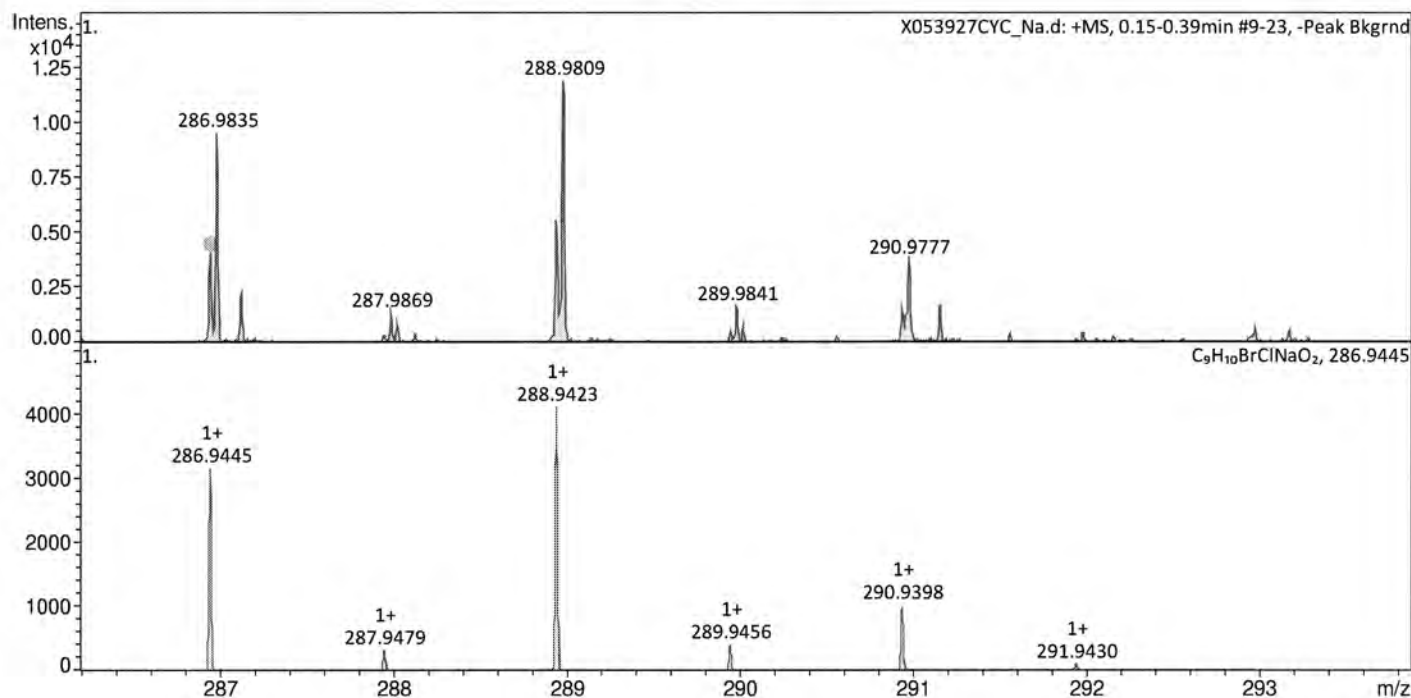

| Meas. m/z  | z  | # | Ion Formula   | m/z        | err [ppm] | mSigma | rdb | e <sup>-</sup> | Conf |
|------------|----|---|---------------|------------|-----------|--------|-----|----------------|------|
| 106.948856 | 1+ | 1 | C2H4Br        | 106.949089 | 2.2       | 41.3   | 1.0 | even           |      |
| 141.010140 | 1+ | 1 | C7H6ClO       | 141.010169 | 0.2       | 9.4    | 5.0 | even           |      |
| 246.952235 | 1+ | 1 | C9H9BrClO     | 246.951981 | -1.0      | 131.0  | 5.0 | even           |      |
| 286.944829 | 1+ | 1 | C9H10BrClNaO2 | 286.944490 | -1.2      | 54.1   | 4.0 | even           |      |

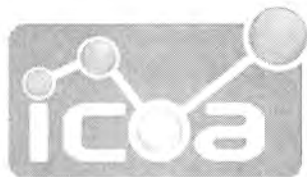

# Spectrométrie de Masse

## Demande d'analyse HRMS

### High-Resolution Mass Spectrometry analysis request form

|                                                                                                                               |                                                                                                                                  |                                                                                        |
|-------------------------------------------------------------------------------------------------------------------------------|----------------------------------------------------------------------------------------------------------------------------------|----------------------------------------------------------------------------------------|
| Demandeur (Nom+Prénom) :<br><b>Sava Alexandru</b><br>(Submitter's name) : <b>AS</b>                                           | Tél :<br>(Phone)                                                                                                                 | Mail :<br>(E-mail)                                                                     |
| Nom de l'échantillon : <b>AS 301</b><br>(Sample name) <b>3d</b>                                                               | Confirmation :<br><input checked="" type="checkbox"/> Structure connue<br>(Known structure)                                      | Identification :<br><input type="checkbox"/> Structure inconnue<br>(Unknown structure) |
| Formule brute : <b>C<sub>9</sub>H<sub>9</sub>BrCl<sub>2</sub>O<sub>2</sub></b><br>(Molecular formula)                         | <p>Structure :</p> <p>Chemical Formula: C<sub>9</sub>H<sub>9</sub>BrCl<sub>2</sub>O<sub>2</sub><br/>Molecular Weight: 299.97</p> |                                                                                        |
| Masse moléculaire : <b>299,97</b><br>(Molecular weight)                                                                       |                                                                                                                                  |                                                                                        |
| Solvant conseillé : <b>CH<sub>3</sub>OH</b><br>(Recommended solvent)                                                          |                                                                                                                                  |                                                                                        |
| Concentration ou masse :<br>(Concentration or weight)<br><b>1 mg / 1mL</b>                                                    |                                                                                                                                  |                                                                                        |
| Remarques (conservation, solvants déconseillés, toxicité...) :<br>(Notes: storage, sample handling precautions, toxicity ...) |                                                                                                                                  |                                                                                        |
| Responsable : <b>Sylvain Routier</b><br>(Supervisor)                                                                          | Date : <b>06.03.2019</b><br>(Date)                                                                                               | Bon pour accord :<br>(Signed as agreed)                                                |

#### Partie réservée au service (For MS facility use only)

|                                                             |                                                   |                                    |
|-------------------------------------------------------------|---------------------------------------------------|------------------------------------|
| Position sur le rack :<br>(Position on the rack) <b>GE6</b> | Nom du fichier :<br>(File name) <b>X048802CYC</b> | Date :<br>(Date) <b>13/03/2019</b> |
| Remarques :<br>(Comments and suggestions)                   |                                                   |                                    |

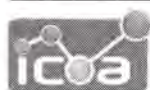

Analysis Info

Sample Name **AS301**  
Analysis Name X048802CYC\_Na.d

Acquisition Date 13/03/2019 21:31:39  
Instrument / Ser# maXis 255552.00086  
Method positif-6.m

Acquisition Parameter

|             |          |                       |            |                |           |
|-------------|----------|-----------------------|------------|----------------|-----------|
| Source Type | ESI      | Ion Polarity          | Positive   | Set Nebulizer  | 0.6 Bar   |
| Scan Begin  | 50 m/z   | Set Capillary         | 4500 V     | Set Dry Heater | 200 °C    |
| Scan End    | 2500 m/z | Set Collision Cell RF | 1800.0 Vpp | Set Dry Gas    | 7.0 l/min |

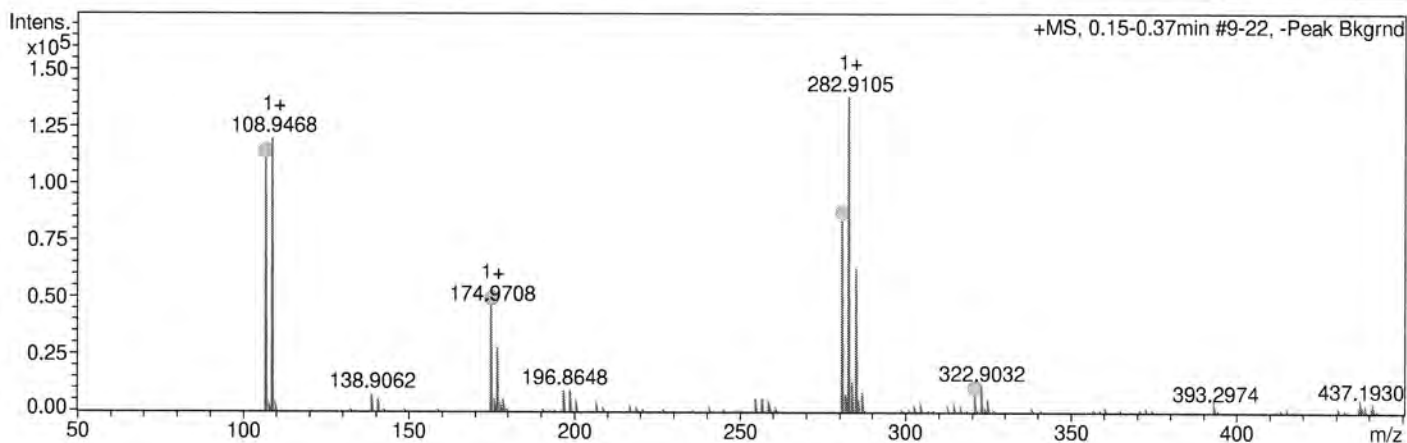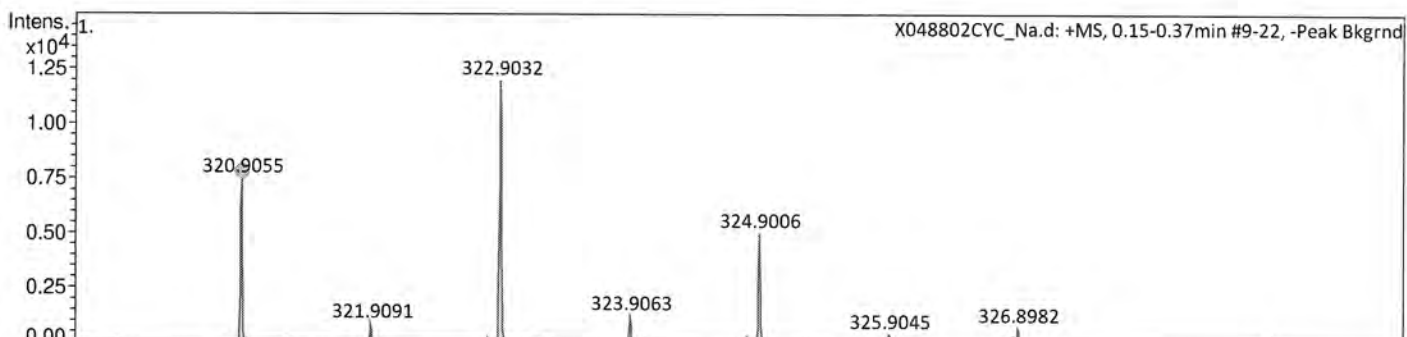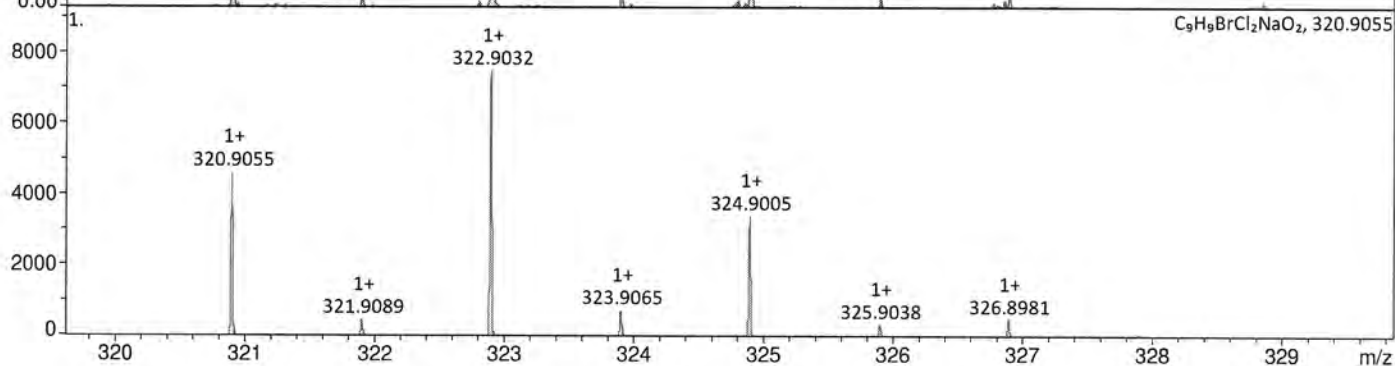

| Meas. m/z  | z  | # | Ion Formula   | m/z        | err [ppm] | mSigma | rdb | e <sup>-</sup> | Conf |
|------------|----|---|---------------|------------|-----------|--------|-----|----------------|------|
| 106.948765 | 1+ | 1 | C2H4Br        | 106.949089 | 3.0       | 39.7   | 1.0 | even           |      |
| 174.970843 | 1+ | 1 | C7H5Cl2O      | 174.971197 | 2.0       | 17.4   | 5.0 | even           |      |
| 280.912926 | 1+ | 1 | C9H8BrCl2O    | 280.913009 | 0.3       | 3.8    | 5.0 | even           |      |
| 320.905520 | 1+ | 1 | C9H9BrCl2NaO2 | 320.905518 | -0.0      | 15.2   | 4.0 | even           |      |

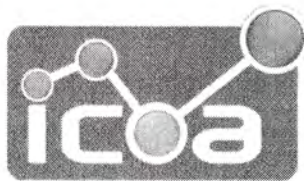

# Spectrométrie de Masse

## Demande d'analyse HRMS

### High-Resolution Mass Spectrometry analysis request form

|                                                                                                                               |                                                                                                         |                                         |
|-------------------------------------------------------------------------------------------------------------------------------|---------------------------------------------------------------------------------------------------------|-----------------------------------------|
| Demandeur (Nom+Prénom) :<br><b>Sava Alexandru</b><br>(Submitter's name) : <b>AS</b>                                           | Tél :<br>(Phone)                                                                                        | Mail :<br>(E-mail)                      |
| Nom de l'échantillon : <b>AS 362</b><br>(Sample name) <b>3e</b>                                                               | Confirmation :<br><input checked="" type="checkbox"/> Structure connue<br>(Known structure)             |                                         |
| Formule brute : <b>C<sub>9</sub>H<sub>10</sub>BrNO<sub>4</sub></b><br>(Molecular formula)                                     | Identification :<br><input type="checkbox"/> Structure inconnue<br>(Unknown structure)                  |                                         |
| Masse moléculaire : <b>276,09</b><br>(Molecular weight)                                                                       | Structure : (Chemical structure)                                                                        |                                         |
| Solvant conseillé : <b>CH<sub>3</sub>OH</b><br>(Recommended solvent)                                                          |                                                                                                         |                                         |
| Concentration ou masse :<br>(Concentration or weight)<br><b>1 mg / 1mL</b>                                                    | Chemical Formula: <b>C<sub>9</sub>H<sub>10</sub>BrNO<sub>4</sub></b><br>Molecular Weight: <b>276.09</b> |                                         |
| Remarques (conservation, solvants déconseillés, toxicité...) :<br>(Notes: storage, sample handling precautions, toxicity ...) |                                                                                                         |                                         |
| Responsable : <b>Sylvain Routier</b><br>(Supervisor)                                                                          | Date : <b>10.12.2019</b><br>(Date)                                                                      | Bon pour accord :<br>(Signed as agreed) |

### Partie réservée au service (For MS facility use only)

|                                                             |                                                   |                                    |
|-------------------------------------------------------------|---------------------------------------------------|------------------------------------|
| Position sur le rack :<br>(Position on the rack) <b>GA7</b> | Nom du fichier :<br>(File name) <b>X053926CYC</b> | Date :<br>(Date) <b>10/12/2019</b> |
| Remarques :<br>(Comments and suggestions)                   |                                                   |                                    |

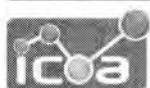

Analysis Info

Sample Name **AS362**  
Analysis Name X053926CYC.d

Acquisition Date 11/12/2019 17:20:59  
Instrument / Ser# maXis 255552.00086  
Method Positif.m

Acquisition Parameter

|             |          |                       |            |                |           |
|-------------|----------|-----------------------|------------|----------------|-----------|
| Source Type | ESI      | Ion Polarity          | Positive   | Set Nebulizer  | 0.6 Bar   |
| Scan Begin  | 50 m/z   | Set Capillary         | 4500 V     | Set Dry Heater | 200 °C    |
| Scan End    | 2500 m/z | Set Collision Cell RF | 1800.0 Vpp | Set Dry Gas    | 7.0 l/min |

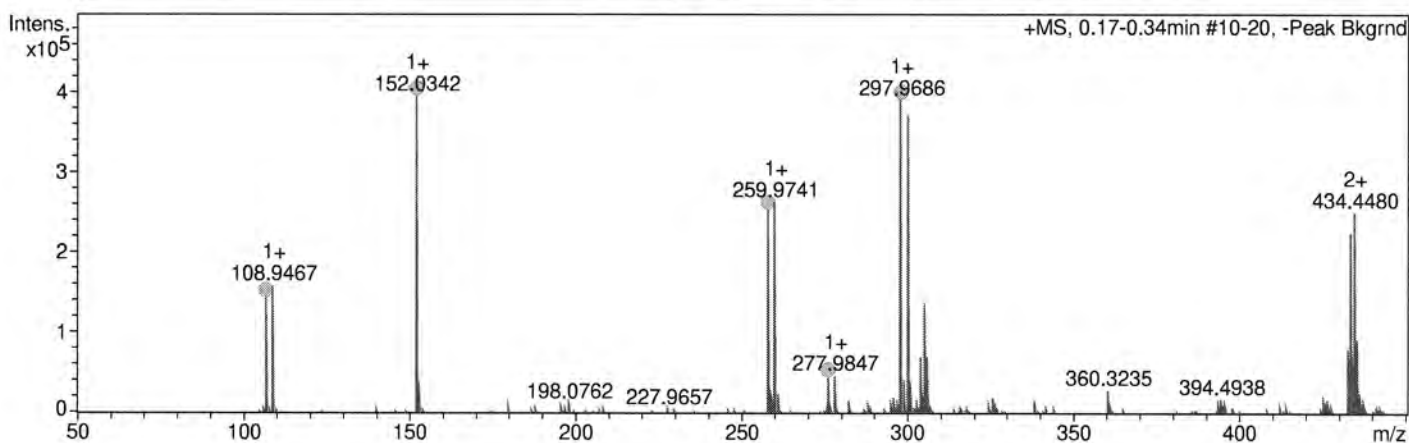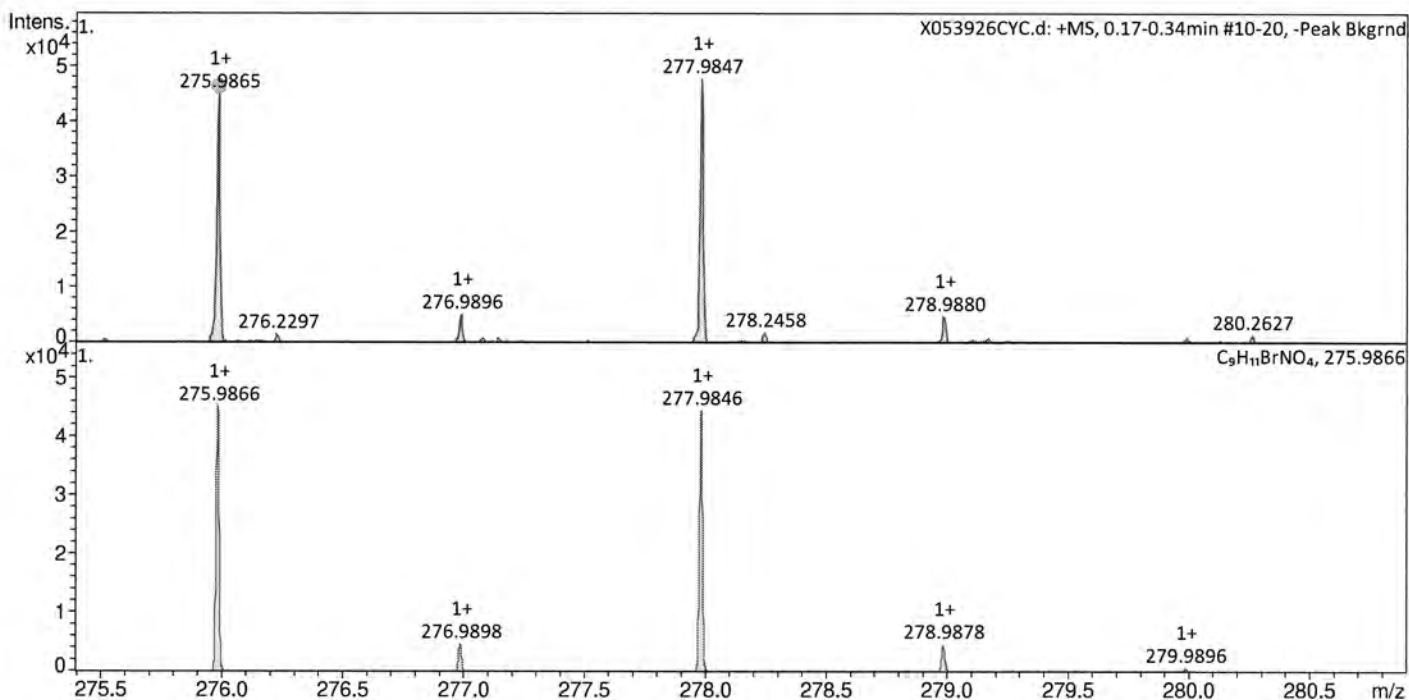

| Meas. m/z  | z  | # | Ion Formula  | m/z        | err [ppm] | mSigma | rdB | e <sup>-</sup> | Conf |
|------------|----|---|--------------|------------|-----------|--------|-----|----------------|------|
| 106.948745 | 1+ | 1 | C2H4Br       | 106.949089 | 3.2       | 48.9   | 1.0 | even           |      |
| 152.034223 | 1+ | 1 | C7H6NO3      | 152.034219 | -0.0      | 9.7    | 6.0 | even           |      |
| 257.976004 | 1+ | 1 | C9H9BrNO3    | 257.976032 | 0.1       | 19.1   | 6.0 | even           |      |
| 275.986498 | 1+ | 1 | C9H11BrNO4   | 275.986596 | 0.4       | 27.3   | 5.0 | even           |      |
| 297.968602 | 1+ | 1 | C9H10BrNNaO4 | 297.968541 | -0.2      | 15.1   | 5.0 | even           |      |

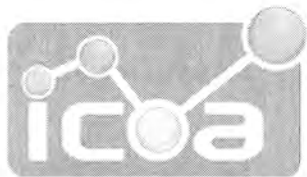

# Spectrométrie de Masse

## Demande d'analyse HRMS

### High-Resolution Mass Spectrometry analysis request form

|                                                                                                                               |                                                                                                                                                                |                                                                                        |
|-------------------------------------------------------------------------------------------------------------------------------|----------------------------------------------------------------------------------------------------------------------------------------------------------------|----------------------------------------------------------------------------------------|
| Demandeur (Nom+Prénom) :<br><b>Sava Alexandru</b><br>(Submitter's name) : <b>AS</b>                                           | Tél :<br>(Phone)                                                                                                                                               | Mail :<br>(E-mail)                                                                     |
| Nom de l'échantillon : <b>AS 297</b><br>(Sample name) <b>3g</b>                                                               | Confirmation :<br><input checked="" type="checkbox"/> Structure connue<br>(Known structure)                                                                    | Identification :<br><input type="checkbox"/> Structure inconnue<br>(Unknown structure) |
| Formule brute : <b>C<sub>11</sub>H<sub>15</sub>BrO<sub>3</sub></b><br>(Molecular formula)                                     | <p>Structure :</p> <p>Chemical Formula: <b>C<sub>11</sub>H<sub>15</sub>BrO<sub>3</sub></b><br/>Molecular Weight: <b>275.14</b></p> <p>(Chemical structure)</p> |                                                                                        |
| Masse moléculaire : <b>275,14</b><br>(Molecular weight)                                                                       |                                                                                                                                                                |                                                                                        |
| Solvant conseillé : <b>CH<sub>3</sub>OH</b><br>(Recommended solvent)                                                          |                                                                                                                                                                |                                                                                        |
| Concentration ou masse :<br>(Concentration or weight)<br><b>1 mg / 1mL</b>                                                    |                                                                                                                                                                |                                                                                        |
| Remarques (conservation, solvants déconseillés, toxicité...) :<br>(Notes: storage, sample handling precautions, toxicity ...) |                                                                                                                                                                |                                                                                        |
| Responsable : <b>Sylvain Routier</b><br>(Supervisor)                                                                          | Date : <b>06.03.2019</b><br>(Date)                                                                                                                             | Bon pour accord :<br>(Signed as agreed)                                                |

### Partie réservée au service (For MS facility use only)

|                                                             |                                                   |                                    |
|-------------------------------------------------------------|---------------------------------------------------|------------------------------------|
| Position sur le rack :<br>(Position on the rack) <b>GE5</b> | Nom du fichier :<br>(File name) <b>X048801CYC</b> | Date :<br>(Date) <b>13/03/2019</b> |
| Remarques :<br>(Comments and suggestions)                   |                                                   |                                    |

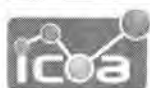

Analysis Info

Sample Name **AS297**  
Analysis Name X048801CYC.d

Acquisition Date 13/03/2019 19:38:44  
Instrument / Ser# maXis 255552.00086  
Method positif-6.m

Acquisition Parameter

|             |          |                       |            |                |           |
|-------------|----------|-----------------------|------------|----------------|-----------|
| Source Type | ESI      | Ion Polarity          | Positive   | Set Nebulizer  | 0.6 Bar   |
| Scan Begin  | 50 m/z   | Set Capillary         | 4500 V     | Set Dry Heater | 200 °C    |
| Scan End    | 2500 m/z | Set Collision Cell RF | 1800.0 Vpp | Set Dry Gas    | 7.0 l/min |

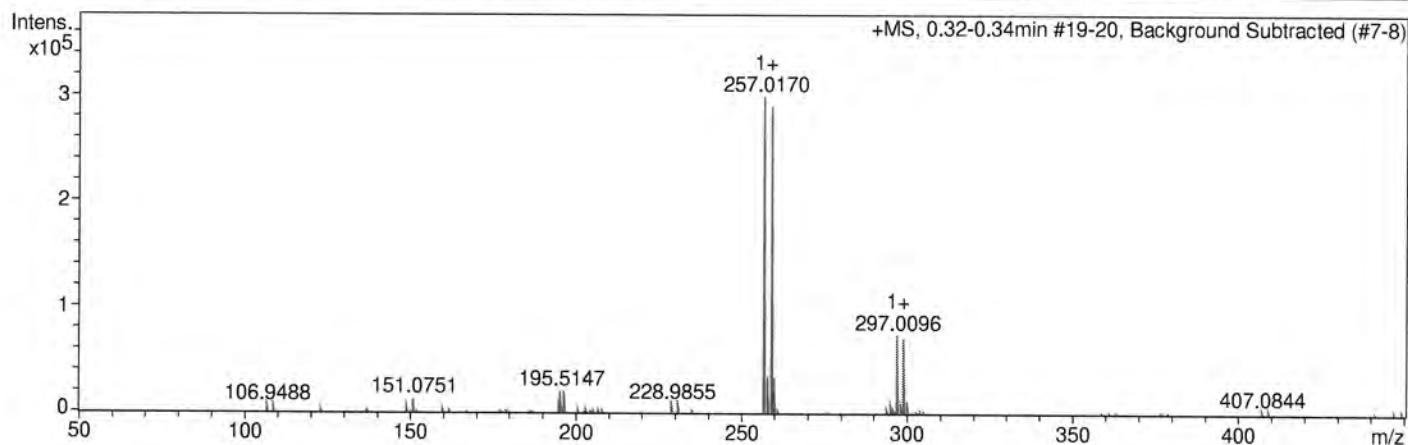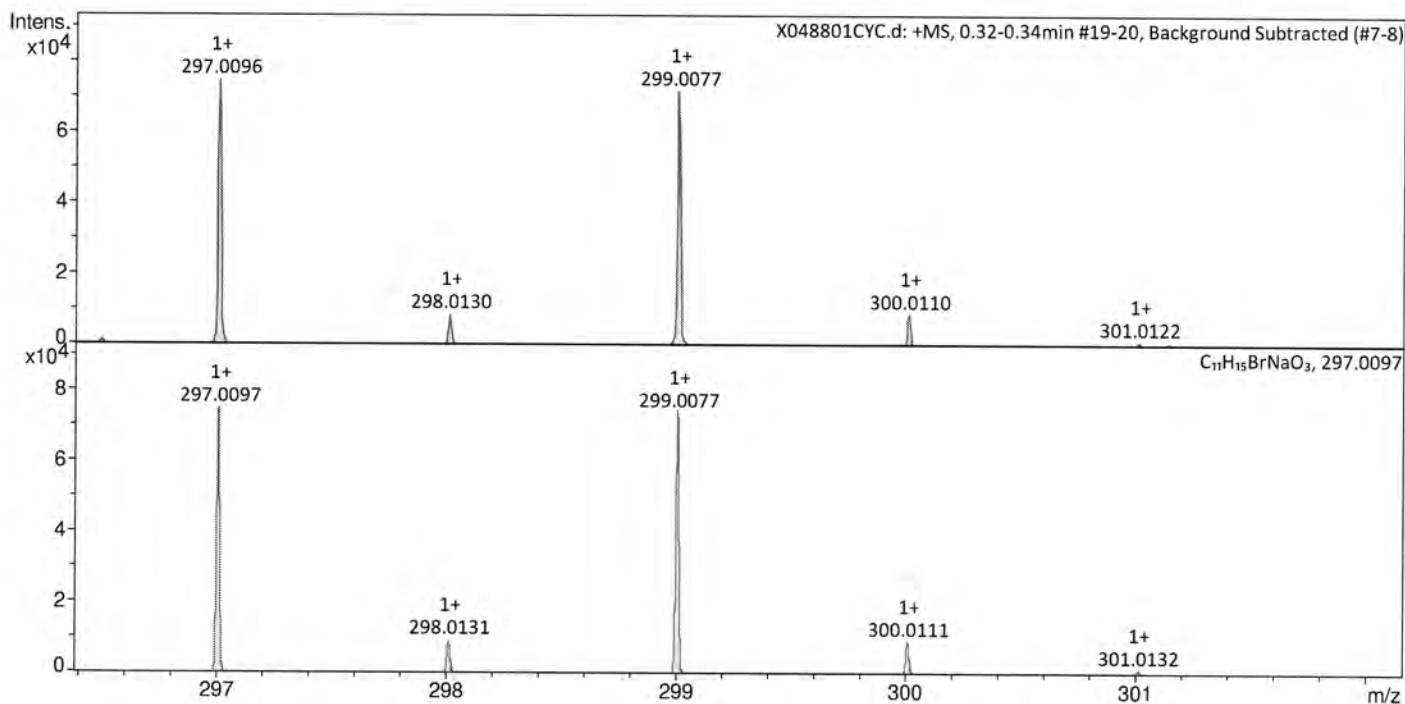

| Meas. m/z  | z  | # | Ion Formula  | m/z        | err [ppm] | mSigma | rdb | e <sup>-</sup> | Conf |
|------------|----|---|--------------|------------|-----------|--------|-----|----------------|------|
| 106.948763 | 1+ | 1 | C2H4Br       | 106.949089 | 3.0       | 16.4   | 1.0 | even           |      |
| 228.985531 | 1+ | 1 | C9H10BrO2    | 228.985868 | 1.5       | 15.6   | 5.0 | even           |      |
| 257.017002 | 1+ | 1 | C11H14BrO2   | 257.017168 | 0.6       | 8.3    | 5.0 | even           |      |
| 297.009633 | 1+ | 1 | C11H15BrNaO3 | 297.009677 | 0.1       | 11.9   | 4.0 | even           |      |

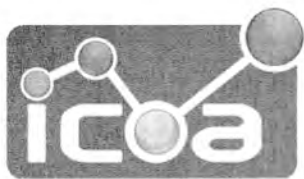

# Spectrométrie de Masse

## Demande d'analyse HRMS

### High-Resolution Mass Spectrometry analysis request form

|                                                                                                                               |                                                                                                         |                                                                                        |
|-------------------------------------------------------------------------------------------------------------------------------|---------------------------------------------------------------------------------------------------------|----------------------------------------------------------------------------------------|
| Demandeur (Nom+Prénom) :<br><b>Sava Alexandru</b><br>(Submitter's name) : <b>AS</b>                                           | Tél :<br>(Phone)                                                                                        | Mail :<br>(E-mail)                                                                     |
| Nom de l'échantillon : <b>AS 319</b><br>(Sample name) <b>3h</b>                                                               | Confirmation :<br><input checked="" type="checkbox"/> Structure connue<br>(Known structure)             | Identification :<br><input type="checkbox"/> Structure inconnue<br>(Unknown structure) |
| Formule brute : <b>C<sub>11</sub>H<sub>15</sub>BrO<sub>4</sub></b><br>(Molecular formula)                                     | Structure :                                                                                             |                                                                                        |
| Masse moléculaire : <b>291,14</b><br>(Molecular weight)                                                                       |                                                                                                         |                                                                                        |
| Solvant conseillé : <b>CH<sub>3</sub>OH</b><br>(Recommended solvent)                                                          | Chemical Formula: <b>C<sub>11</sub>H<sub>15</sub>BrO<sub>4</sub></b><br>Molecular Weight: <b>291.14</b> |                                                                                        |
| Concentration ou masse :<br>(Concentration or weight)<br><b>1 mg / 1mL</b>                                                    | (Chemical structure)                                                                                    |                                                                                        |
| Remarques (conservation, solvants déconseillés, toxicité...) :<br>(Notes: storage, sample handling precautions, toxicity ...) |                                                                                                         |                                                                                        |
| Responsable : <b>Sylvain Routier</b><br>(Supervisor)                                                                          | Date : <b>12.03.2019</b><br>(Date)                                                                      | Bon pour accord :<br>(Signed as agreed)                                                |

### Partie réservée au service (For MS facility use only)

|                                                             |                                                   |                                    |
|-------------------------------------------------------------|---------------------------------------------------|------------------------------------|
| Position sur le rack :<br>(Position on the rack) <b>GD3</b> | Nom du fichier :<br>(File name) <b>X048787CYC</b> | Date :<br>(Date) <b>13/03/2019</b> |
| Remarques :<br>(Comments and suggestions)                   |                                                   |                                    |

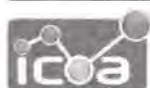

Analysis Info

Sample Name **AS319**  
Analysis Name X048787CYC.d

Acquisition Date 13/03/2019 17:00:52  
Instrument / Ser# maXis 255552.00086  
Method positif-6.m

Acquisition Parameter

|             |          |                       |            |                |           |
|-------------|----------|-----------------------|------------|----------------|-----------|
| Source Type | ESI      | Ion Polarity          | Positive   | Set Nebulizer  | 0.6 Bar   |
| Scan Begin  | 50 m/z   | Set Capillary         | 4500 V     | Set Dry Heater | 200 °C    |
| Scan End    | 2500 m/z | Set Collision Cell RF | 1800.0 Vpp | Set Dry Gas    | 7.0 l/min |

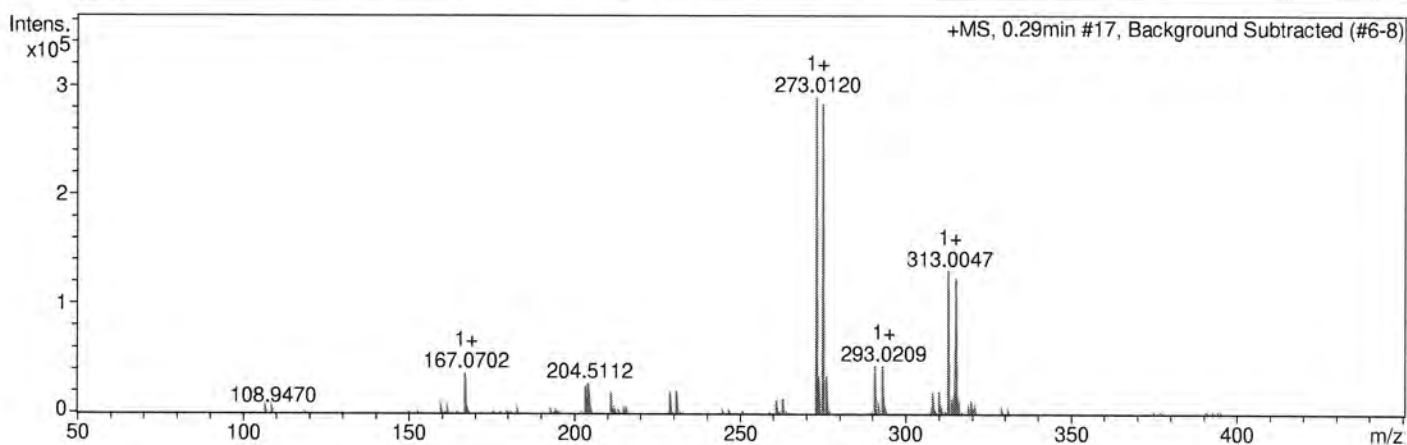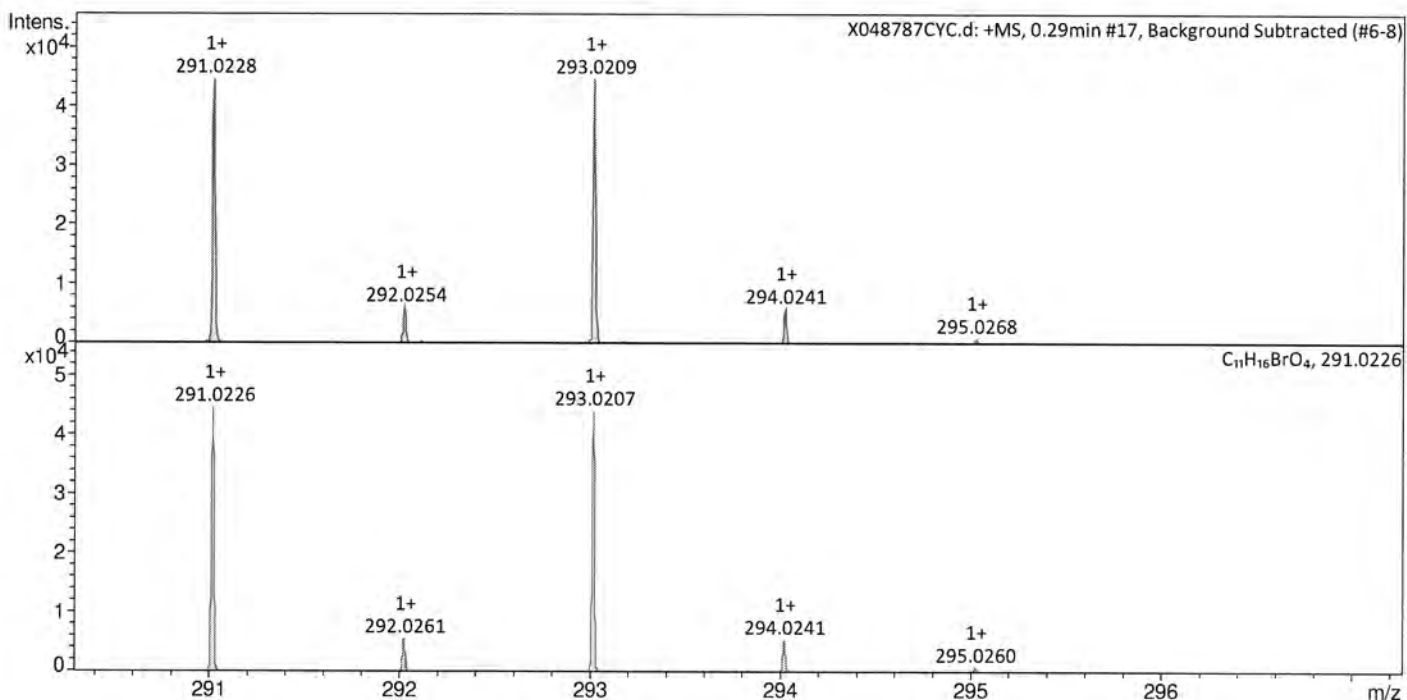

| Meas. m/z  | z  | # | Ion Formula  | m/z        | err [ppm] | mSigma | rdb | e <sup>-</sup> | Conf |
|------------|----|---|--------------|------------|-----------|--------|-----|----------------|------|
| 106.948896 | 1+ | 1 | C2H4Br       | 106.949089 | 1.8       | 67.6   | 1.0 | even           |      |
| 167.070172 | 1+ | 1 | C9H11O3      | 167.070271 | 0.6       | 8.0    | 5.0 | even           |      |
| 228.985811 | 1+ | 1 | C9H10BrO2    | 228.985868 | 0.2       | 23.4   | 5.0 | even           |      |
| 261.011579 | 1+ | 1 | C10H14BrO3   | 261.012083 | 1.9       | 21.2   | 4.0 | even           |      |
| 291.022764 | 1+ | 1 | C11H16BrO4   | 291.022648 | -0.4      | 8.9    | 4.0 | even           |      |
| 308.049282 | 1+ | 1 | C11H19BrNO4  | 308.049197 | -0.3      | 18.4   | 3.0 | even           |      |
| 313.004664 | 1+ | 1 | C11H15BrNaO4 | 313.004592 | -0.2      | 16.7   | 4.0 | even           |      |

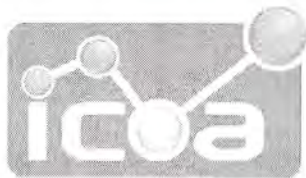

# Spectrométrie de Masse

## Demande d'analyse HRMS

### High-Resolution Mass Spectrometry analysis request form

|                                                                                                                               |  |                                                                                                                                                                                                                                     |                                                                                        |
|-------------------------------------------------------------------------------------------------------------------------------|--|-------------------------------------------------------------------------------------------------------------------------------------------------------------------------------------------------------------------------------------|----------------------------------------------------------------------------------------|
| Demandeur (Nom+Prénom) :<br><b>Sava Alexandru</b><br>(Submitter's name) : <b>AS</b>                                           |  | Tél :<br>(Phone)                                                                                                                                                                                                                    | Mail :<br>(E-mail)                                                                     |
| Nom de l'échantillon : <b>AS 284</b><br>(Sample name) <b>4a</b>                                                               |  | Confirmation :<br><input checked="" type="checkbox"/> Structure connue<br>(Known structure)                                                                                                                                         | Identification :<br><input type="checkbox"/> Structure inconnue<br>(Unknown structure) |
| Formule brute : <b>C<sub>9</sub>H<sub>11</sub>NO<sub>5</sub></b><br>(Molecular formula)                                       |  | Structure :<br>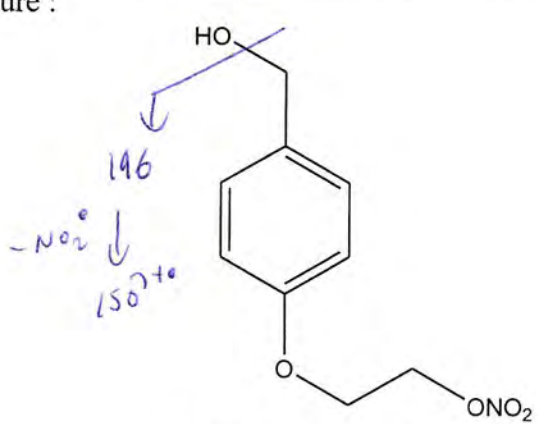<br>Chemical Formula: <b>C<sub>9</sub>H<sub>11</sub>NO<sub>5</sub></b><br>Molecular Weight: <b>213.19</b><br>(Chemical structure) |                                                                                        |
| Masse moléculaire : <b>213,19</b><br>(Molecular weight)                                                                       |  |                                                                                                                                                                                                                                     |                                                                                        |
| Solvant conseillé : <b>CH<sub>3</sub>OH</b><br>(Recommended solvent)                                                          |  |                                                                                                                                                                                                                                     |                                                                                        |
| Concentration ou masse :<br>(Concentration or weight)<br><b>1 mg / 1mL</b>                                                    |  |                                                                                                                                                                                                                                     |                                                                                        |
| Remarques (conservation, solvants déconseillés, toxicité...) :<br>(Notes: storage, sample handling precautions, toxicity ...) |  |                                                                                                                                                                                                                                     |                                                                                        |
| Responsable : <b>Sylvain Routier</b><br>(Supervisor)                                                                          |  | Date : <b>06.03.2018</b><br>(Date)                                                                                                                                                                                                  | Bon pour accord :<br>(Signed as agreed)                                                |

#### Partie réservée au service (For MS facility use only)

|                                                             |                                                   |                                    |
|-------------------------------------------------------------|---------------------------------------------------|------------------------------------|
| Position sur le rack :<br>(Position on the rack) <b>GH3</b> | Nom du fichier :<br>(File name) <b>X048620CYC</b> | Date :<br>(Date) <b>06/03/2019</b> |
| Remarques :<br>(Comments and suggestions)                   |                                                   |                                    |

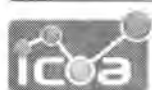

Analysis Info

Sample Name **AS284**  
Analysis Name X048620CYC\_Na.d

Acquisition Date 06/03/2019 18:53:58  
Instrument / Ser# maXis 255552.00086  
Method Positif.m

Acquisition Parameter

|             |          |                       |            |                |           |
|-------------|----------|-----------------------|------------|----------------|-----------|
| Source Type | ESI      | Ion Polarity          | Positive   | Set Nebulizer  | 0.6 Bar   |
| Scan Begin  | 50 m/z   | Set Capillary         | 4500 V     | Set Dry Heater | 200 °C    |
| Scan End    | 2500 m/z | Set Collision Cell RF | 1800.0 Vpp | Set Dry Gas    | 7.0 l/min |

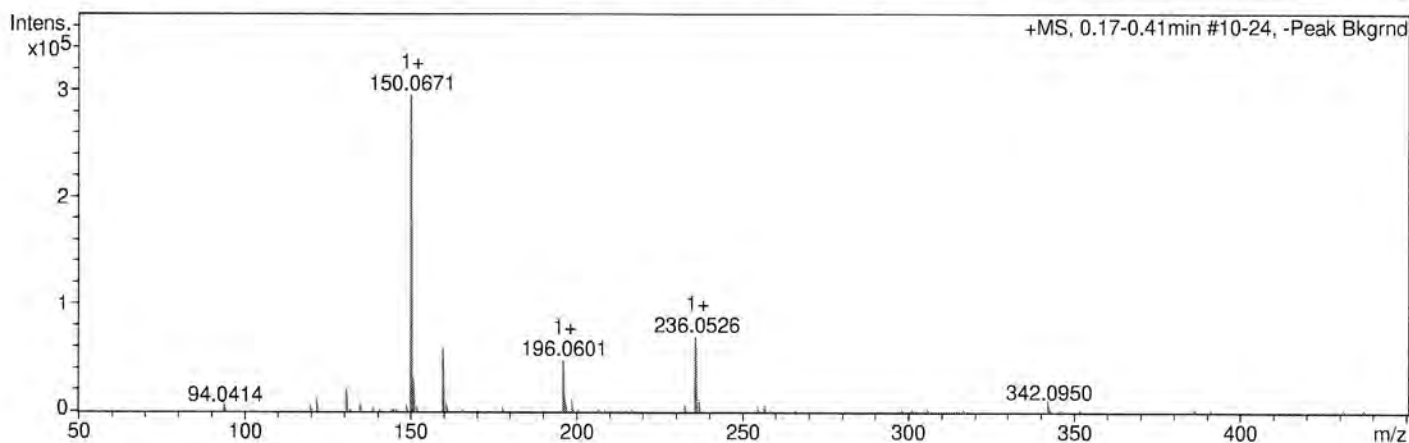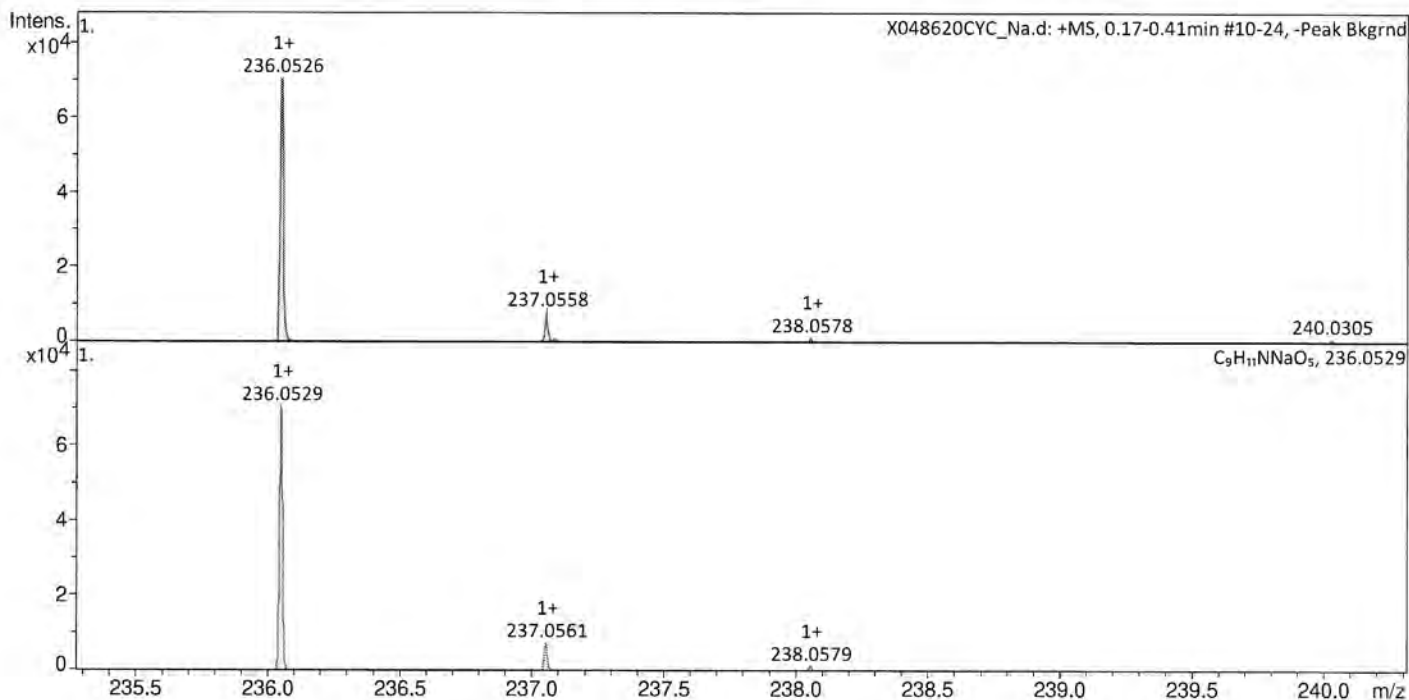

| Meas. m/z  | z  | # | Ion Formula | m/z        | err [ppm] | mSigma | rdb | e <sup>-</sup> | Conf |
|------------|----|---|-------------|------------|-----------|--------|-----|----------------|------|
| 131.046529 | 1+ | 1 | C7H8NaO     | 131.046736 | 1.6       | 2.8    | 4.0 | even           |      |
| 150.067126 | 1+ | 1 | C9H10O2     | 150.067531 | 2.7       | 6.1    | 5.5 | odd            |      |
| 160.049138 | 1+ | 1 | C8H9NaO2    | 160.049475 | 2.1       | 3.4    | 4.5 | odd            |      |
| 196.060093 | 1+ | 1 | C9H10NO4    | 196.060434 | 1.7       | 2.5    | 6.0 | even           |      |
| 236.052571 | 1+ | 1 | C9H11NNaO5  | 236.052943 | 1.6       | 5.0    | 5.0 | even           |      |

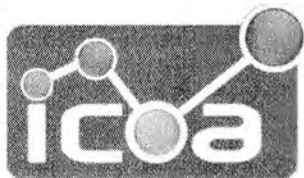

# Spectrométrie de Masse

## Demande d'analyse HRMS

### High-Resolution Mass Spectrometry analysis request form

|                                                                                                                               |                                                                                                            |                                                                                        |
|-------------------------------------------------------------------------------------------------------------------------------|------------------------------------------------------------------------------------------------------------|----------------------------------------------------------------------------------------|
| Demandeur (Nom+Prénom) :<br><b>Sava Alexandru</b><br>(Submitter's name) : <b>AS</b>                                           | Tél :<br>(Phone)                                                                                           | Mail :<br>(E-mail)                                                                     |
| Nom de l'échantillon : <b>AS 385</b><br>(Sample name) <b>4b</b>                                                               | Confirmation :<br><input checked="" type="checkbox"/> Structure connue<br>(Known structure)                | Identification :<br><input type="checkbox"/> Structure inconnue<br>(Unknown structure) |
| Formule brute : <b>C<sub>9</sub>H<sub>10</sub>FNO<sub>5</sub></b><br>(Molecular formula)                                      | Structure :(Chemical structure)                                                                            |                                                                                        |
| Masse moléculaire : <b>231,18</b><br>(Molecular weight)                                                                       | <br>Chemical Formula: <b>C<sub>9</sub>H<sub>10</sub>FNO<sub>5</sub></b><br>Molecular Weight: <b>231.18</b> |                                                                                        |
| Solvant conseillé : <b>CH<sub>3</sub>OH</b><br>(Recommended solvent)                                                          |                                                                                                            |                                                                                        |
| Concentration ou masse :<br>(Concentration or weight)<br><b>1 mg / 1mL</b>                                                    |                                                                                                            |                                                                                        |
| Remarques (conservation, solvants déconseillés, toxicité...) :<br>(Notes: storage, sample handling precautions, toxicity ...) |                                                                                                            |                                                                                        |
| Responsable : <b>Sylvain Routier</b><br>(Supervisor)                                                                          | Date : <b>10.12.2019</b><br>(Date)                                                                         | Bon pour accord :<br>(Signed as agreed)                                                |

### Partie réservée au service (For MS facility use only)

|                                                             |                                                   |                                    |
|-------------------------------------------------------------|---------------------------------------------------|------------------------------------|
| Position sur le rack :<br>(Position on the rack) <b>GC5</b> | Nom du fichier :<br>(File name) <b>X053948CYC</b> | Date :<br>(Date) <b>10/12/2019</b> |
| Remarques :<br>(Comments and suggestions)                   |                                                   |                                    |

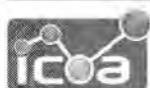

Analysis Info

Sample Name **AS385**  
Analysis Name X053948CYC\_Na.d

Acquisition Date 11/12/2019 20:28:06  
Instrument / Ser# maXis 255552.00086  
Method Positif.m

Acquisition Parameter

|             |          |                       |            |                |           |
|-------------|----------|-----------------------|------------|----------------|-----------|
| Source Type | ESI      | Ion Polarity          | Positive   | Set Nebulizer  | 0.6 Bar   |
| Scan Begin  | 50 m/z   | Set Capillary         | 4500 V     | Set Dry Heater | 200 °C    |
| Scan End    | 2500 m/z | Set Collision Cell RF | 1800.0 Vpp | Set Dry Gas    | 7.0 l/min |

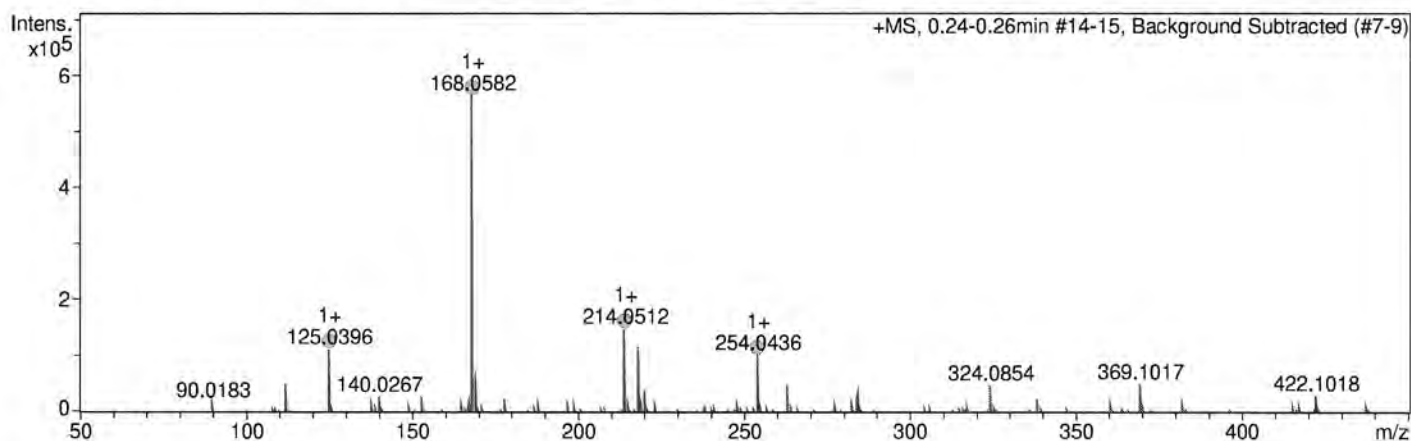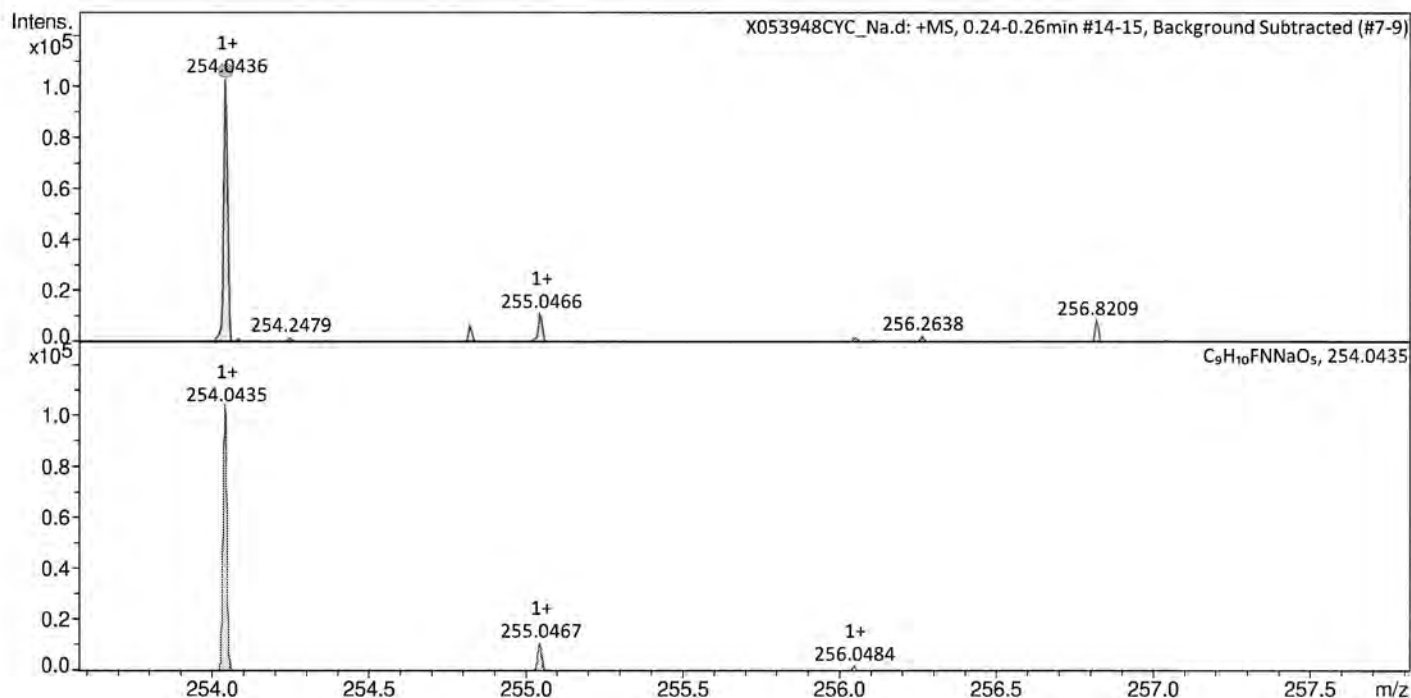

| Meas. m/z  | z  | # | Ion Formula | m/z        | err [ppm] | mSigma | rdb | e <sup>-</sup> | Conf |
|------------|----|---|-------------|------------|-----------|--------|-----|----------------|------|
| 125.039593 | 1+ | 1 | C7H6FO      | 125.039719 | 1.0       | 3.1    | 5.0 | even           |      |
| 168.058180 | 1+ | 1 | C9H9FO2     | 168.058109 | -0.4      | 17.1   | 5.5 | odd            |      |
| 214.051205 | 1+ | 1 | C9H9FNO4    | 214.051012 | -0.9      | 6.6    | 6.0 | even           |      |
| 254.043562 | 1+ | 1 | C9H10FNNaO5 | 254.043521 | -0.2      | 1.4    | 5.0 | even           |      |

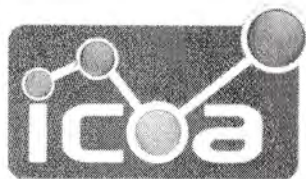

# Spectrométrie de Masse

## Demande d'analyse HRMS

### High-Resolution Mass Spectrometry analysis request form

|                                                                                                                               |                                                                                                                                                                                                                                    |                                                                                        |
|-------------------------------------------------------------------------------------------------------------------------------|------------------------------------------------------------------------------------------------------------------------------------------------------------------------------------------------------------------------------------|----------------------------------------------------------------------------------------|
| Demandeur (Nom+Prénom) :<br><b>Sava Alexandru</b><br>(Submitter's name) : <b>AS</b>                                           | Tél :<br>(Phone)                                                                                                                                                                                                                   | Mail :<br>(E-mail)                                                                     |
| Nom de l'échantillon : <b>AS 375</b><br>(Sample name) <b>4c</b>                                                               | Confirmation :<br><input checked="" type="checkbox"/> Structure connue<br>(Known structure)                                                                                                                                        | Identification :<br><input type="checkbox"/> Structure inconnue<br>(Unknown structure) |
| Formule brute : <b>C<sub>9</sub>H<sub>10</sub>ClNO<sub>5</sub></b><br>(Molecular formula)                                     | Structure : (Chemical structure)<br>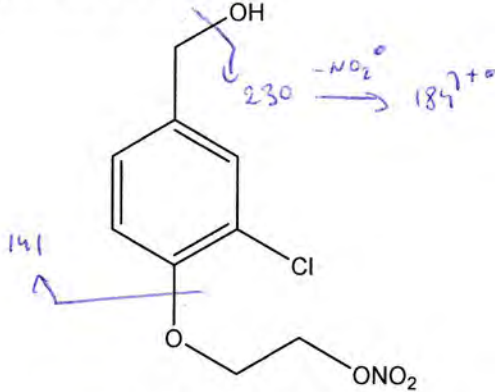<br>Chemical Formula: <b>C<sub>9</sub>H<sub>10</sub>ClNO<sub>5</sub></b><br>Molecular Weight: <b>247.63</b> |                                                                                        |
| Masse moléculaire : <b>247,63</b><br>(Molecular weight)                                                                       |                                                                                                                                                                                                                                    |                                                                                        |
| Solvant conseillé : <b>CH<sub>3</sub>OH</b><br>(Recommended solvent)                                                          |                                                                                                                                                                                                                                    |                                                                                        |
| Concentration ou masse :<br>(Concentration or weight)<br><b>1 mg / 1mL</b>                                                    |                                                                                                                                                                                                                                    |                                                                                        |
| Remarques (conservation, solvants déconseillés, toxicité...) :<br>(Notes: storage, sample handling precautions, toxicity ...) |                                                                                                                                                                                                                                    |                                                                                        |
| Responsable : <b>Sylvain Routier</b><br>(Supervisor)                                                                          | Date : <b>10.12.2019</b><br>(Date)                                                                                                                                                                                                 | Bon pour accord :<br>(Signed as agreed)                                                |

### Partie réservée au service (For MS facility use only)

|                                                             |                                                   |                                    |
|-------------------------------------------------------------|---------------------------------------------------|------------------------------------|
| Position sur le rack :<br>(Position on the rack) <b>GB8</b> | Nom du fichier :<br>(File name) <b>X053939CYC</b> | Date :<br>(Date) <b>10/12/2019</b> |
| Remarques :<br>(Comments and suggestions)                   |                                                   |                                    |

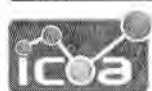

Analysis Info

Sample Name **AS375**  
Analysis Name X053939CYC\_Na.d

Acquisition Date 11/12/2019 20:22:09  
Instrument / Ser# maXis 255552.00086  
Method Positif.m

Acquisition Parameter

|             |          |                       |            |                |           |
|-------------|----------|-----------------------|------------|----------------|-----------|
| Source Type | ESI      | Ion Polarity          | Positive   | Set Nebulizer  | 0.6 Bar   |
| Scan Begin  | 50 m/z   | Set Capillary         | 4500 V     | Set Dry Heater | 200 °C    |
| Scan End    | 2500 m/z | Set Collision Cell RF | 1800.0 Vpp | Set Dry Gas    | 7.0 l/min |

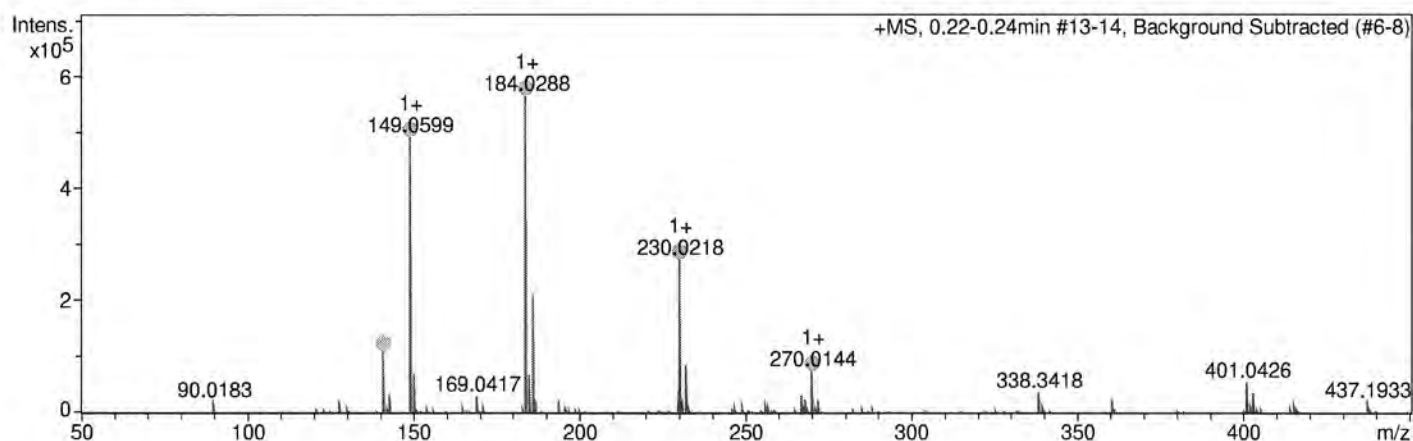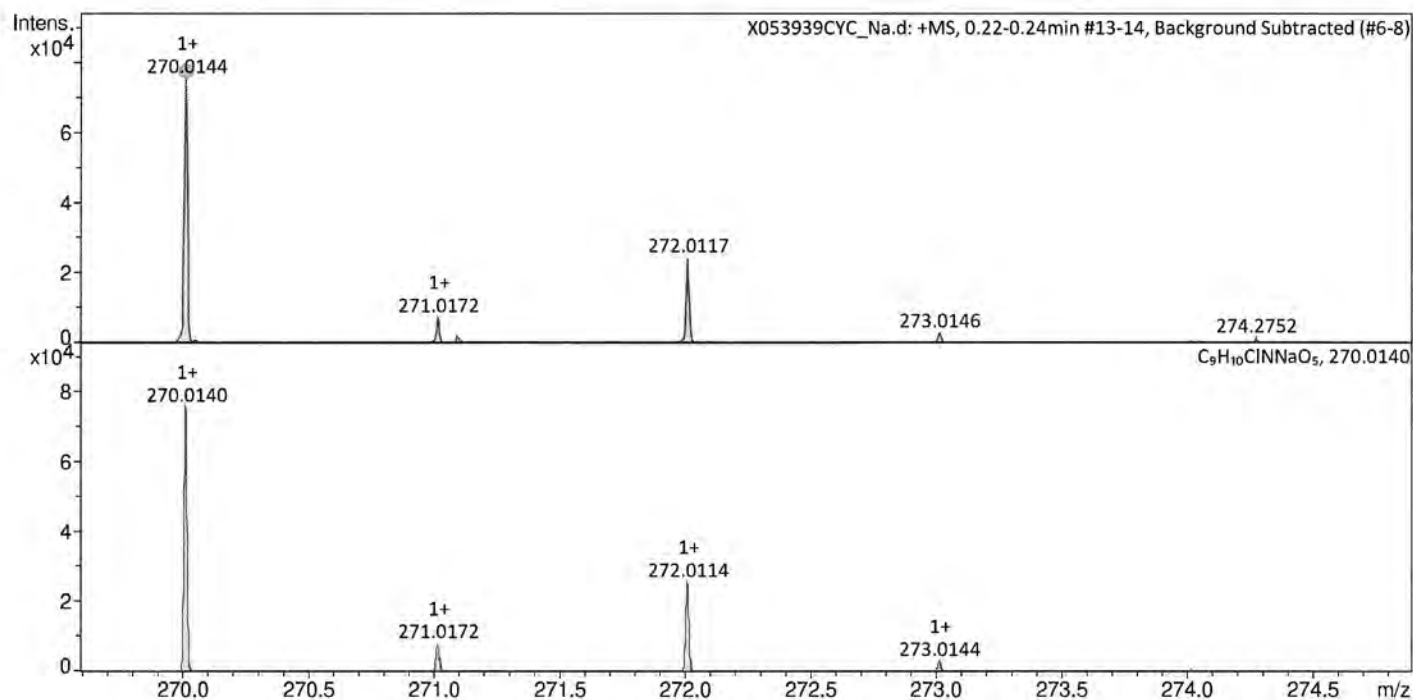

| Meas. m/z  | z  | # | Ion Formula  | m/z        | err [ppm] | mSigma | rdb | e <sup>-</sup> | Conf |
|------------|----|---|--------------|------------|-----------|--------|-----|----------------|------|
| 141.010303 | 1+ | 1 | C7H6ClO      | 141.010169 | -1.0      | 5.1    | 5.0 | even           |      |
| 149.059909 | 1+ | 1 | C9H9O2       | 149.059706 | -1.4      | 27.1   | 6.0 | even           |      |
| 184.028838 | 1+ | 1 | C9H9ClO2     | 184.028559 | -1.5      | 25.4   | 5.5 | odd            |      |
| 230.021837 | 1+ | 1 | C9H9ClNO4    | 230.021462 | -1.6      | 6.6    | 6.0 | even           |      |
| 270.014356 | 1+ | 1 | C9H10ClNNaO5 | 270.013971 | -1.4      | 9.4    | 5.0 | even           |      |

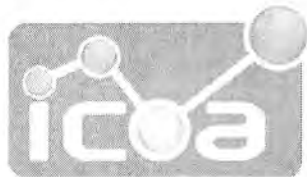

# Spectrométrie de Masse

## Demande d'analyse HRMS

### High-Resolution Mass Spectrometry analysis request form

|                                                                                                      |                                                                                                                               |                                                                                        |
|------------------------------------------------------------------------------------------------------|-------------------------------------------------------------------------------------------------------------------------------|----------------------------------------------------------------------------------------|
| Demandeur (Nom+Prénom) :<br><b>Sava Alexandru</b><br>(Submitter's name) : <b>AS</b>                  | Tél :<br>(Phone)                                                                                                              | Mail :<br>(E-mail)                                                                     |
| Nom de l'échantillon : <b>AS 306</b><br>(Sample name) <b>4d</b>                                      | Confirmation :<br><input checked="" type="checkbox"/> Structure connue<br>(Known structure)                                   | Identification :<br><input type="checkbox"/> Structure inconnue<br>(Unknown structure) |
| Formule brute : <b>C<sub>9</sub>H<sub>9</sub>Cl<sub>2</sub>NO<sub>5</sub></b><br>(Molecular formula) | Structure :<br>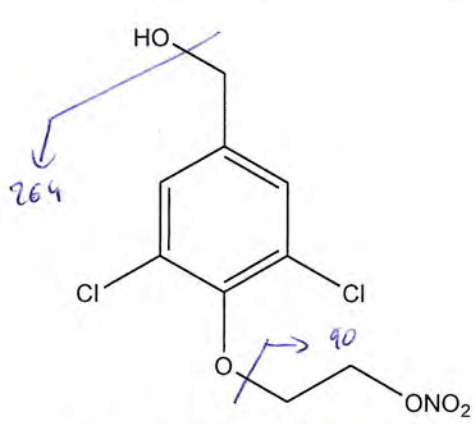                            |                                                                                        |
| Masse moléculaire : <b>282,07</b><br>(Molecular weight)                                              | Chemical Formula: <b>C<sub>9</sub>H<sub>9</sub>Cl<sub>2</sub>NO<sub>5</sub></b><br>Molecular Weight: <b>282.07</b>            |                                                                                        |
| Solvant conseillé : <b>CH<sub>3</sub>OH</b><br>(Recommended solvent)                                 | (Chemical structure)                                                                                                          |                                                                                        |
| Concentration ou masse :<br>(Concentration or weight)<br><b>1 mg / 1mL</b>                           | Remarques (conservation, solvants déconseillés, toxicité...) :<br>(Notes: storage, sample handling precautions, toxicity ...) |                                                                                        |
| Responsable : <b>Sylvain Routier</b><br>(Supervisor)                                                 | Date : <b>06.03.2019</b><br>(Date)                                                                                            | Bon pour accord :<br>(Signed as agreed)                                                |

### Partie réservée au service (For MS facility use only)

|                                                             |                                                   |                                    |
|-------------------------------------------------------------|---------------------------------------------------|------------------------------------|
| Position sur le rack :<br>(Position on the rack) <b>GE1</b> | Nom du fichier :<br>(File name) <b>X048797CYC</b> | Date :<br>(Date) <b>13/03/2019</b> |
| Remarques :<br>(Comments and suggestions)                   |                                                   |                                    |

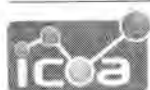

Analysis Info

Sample Name AS306  
Analysis Name X048797CYC\_Na.d

Acquisition Date 13/03/2019 21:26:44  
Instrument / Ser# maXis 255552.00086  
Method positif-6.m

Acquisition Parameter

|             |          |                       |            |                |           |
|-------------|----------|-----------------------|------------|----------------|-----------|
| Source Type | ESI      | Ion Polarity          | Positive   | Set Nebulizer  | 0.6 Bar   |
| Scan Begin  | 50 m/z   | Set Capillary         | 4500 V     | Set Dry Heater | 200 °C    |
| Scan End    | 2500 m/z | Set Collision Cell RF | 1800.0 Vpp | Set Dry Gas    | 7.0 l/min |

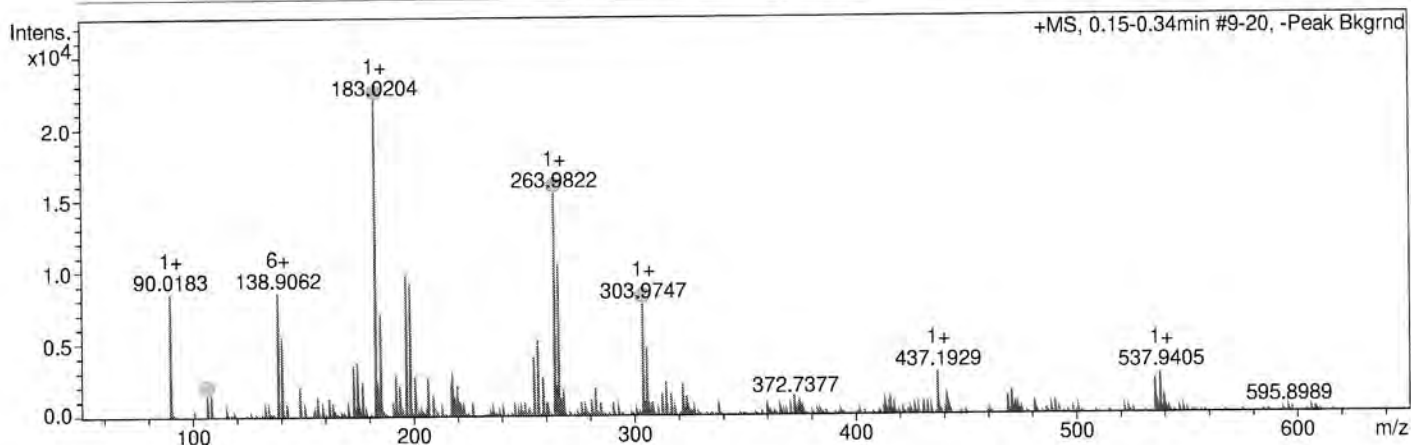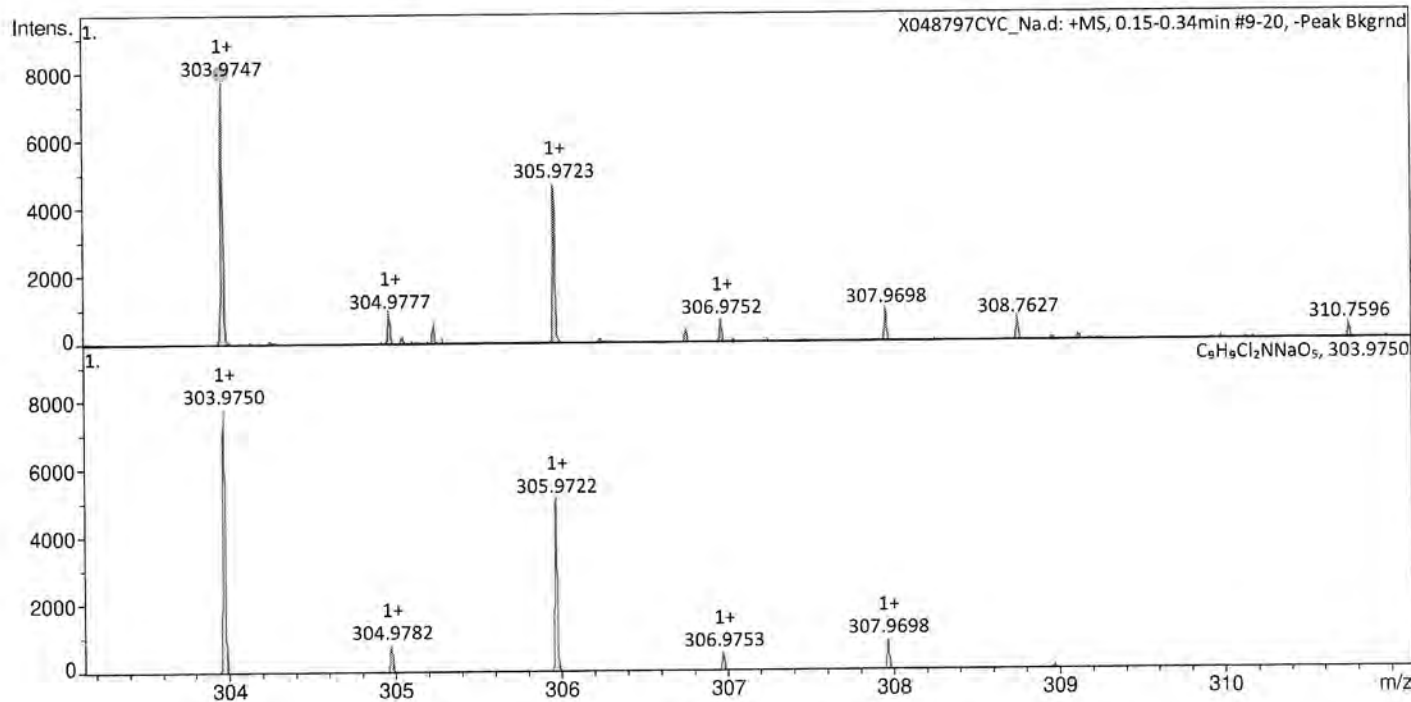

C<sub>9</sub>H<sub>8</sub>Cl<sub>2</sub>NNaO<sub>5</sub>, 303.9750

| Meas. m/z  | z  | # | Ion Formula                                                     | m/z        | err [ppm] | mSigma | rdb | e <sup>-</sup> | Conf |
|------------|----|---|-----------------------------------------------------------------|------------|-----------|--------|-----|----------------|------|
| 90.018341  | 1+ | 1 | C <sub>2</sub> H <sub>4</sub> NO <sub>3</sub>                   | 90.018569  | 2.5       | 7.0    | 2.0 | even           |      |
| 106.948781 | 1+ | 1 | C <sub>2</sub> H <sub>4</sub> Br                                | 106.949089 | 2.9       | 21.9   | 1.0 | even           |      |
| 183.020352 | 1+ | 1 | C <sub>9</sub> H <sub>8</sub> ClO <sub>2</sub>                  | 183.020734 | 2.1       | 5.2    | 6.0 | even           |      |
| 263.982218 | 1+ | 1 | C <sub>9</sub> H <sub>8</sub> Cl <sub>2</sub> NO <sub>4</sub>   | 263.982490 | 1.0       | 19.7   | 6.0 | even           |      |
| 303.974711 | 1+ | 1 | C <sub>9</sub> H <sub>9</sub> Cl <sub>2</sub> NNaO <sub>5</sub> | 303.974998 | 0.9       | 22.4   | 5.0 | even           |      |

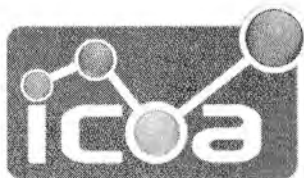

# Spectrométrie de Masse

## Demande d'analyse HRMS

### High-Resolution Mass Spectrometry analysis request form

|                                                                                                                               |                                                                                                                       |                                                                                        |
|-------------------------------------------------------------------------------------------------------------------------------|-----------------------------------------------------------------------------------------------------------------------|----------------------------------------------------------------------------------------|
| Demandeur (Nom+Prénom) :<br><b>Sava Alexandru</b><br>(Submitter's name) : <b>AS</b>                                           | Tél :<br>(Phone)                                                                                                      | Mail :<br>(E-mail)                                                                     |
| Nom de l'échantillon : <b>AS 373</b><br>(Sample name)<br><b>4e</b>                                                            | Confirmation :<br><input checked="" type="checkbox"/> Structure connue<br>(Known structure)                           | Identification :<br><input type="checkbox"/> Structure inconnue<br>(Unknown structure) |
| Formule brute : <b>C<sub>9</sub>H<sub>10</sub>N<sub>2</sub>O<sub>7</sub></b><br>(Molecular formula)                           | Structure :(Chemical structure)                                                                                       |                                                                                        |
| Masse moléculaire : <b>258,19</b><br>(Molecular weight)                                                                       | <br>Chemical Formula: <b>C<sub>9</sub>H<sub>10</sub>N<sub>2</sub>O<sub>7</sub></b><br>Molecular Weight: <b>258.19</b> |                                                                                        |
| Solvant conseillé : <b>CH<sub>3</sub>OH</b><br>(Recommended solvent)                                                          |                                                                                                                       |                                                                                        |
| Concentration ou masse :<br>(Concentration or weight)<br><b>1 mg / 1mL</b>                                                    |                                                                                                                       |                                                                                        |
| Remarques (conservation, solvants déconseillés, toxicité...) :<br>(Notes: storage, sample handling precautions, toxicity ...) |                                                                                                                       |                                                                                        |
| Responsable : <b>Sylvain Routier</b><br>(Supervisor)                                                                          | Date : <b>10.12.2019</b><br>(Date)                                                                                    | Bon pour accord :<br>(Signed as agreed)                                                |

### Partie réservée au service (For MS facility use only)

|                                                             |                                                   |                                    |
|-------------------------------------------------------------|---------------------------------------------------|------------------------------------|
| Position sur le rack :<br>(Position on the rack) <b>GB6</b> | Nom du fichier :<br>(File name) <b>X053937CYC</b> | Date :<br>(Date) <b>10/12/2019</b> |
| Remarques :<br>(Comments and suggestions)                   |                                                   |                                    |

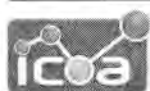

Analysis Info

Sample Name **AS373**  
Analysis Name X053937CYC.d

Acquisition Date 11/12/2019 17:37:42  
Instrument / Ser# maXis 255552.00086  
Method Positif.m

Acquisition Parameter

|             |          |                       |            |                |           |
|-------------|----------|-----------------------|------------|----------------|-----------|
| Source Type | ESI      | Ion Polarity          | Positive   | Set Nebulizer  | 0.6 Bar   |
| Scan Begin  | 50 m/z   | Set Capillary         | 4500 V     | Set Dry Heater | 200 °C    |
| Scan End    | 2500 m/z | Set Collision Cell RF | 1800.0 Vpp | Set Dry Gas    | 7.0 l/min |

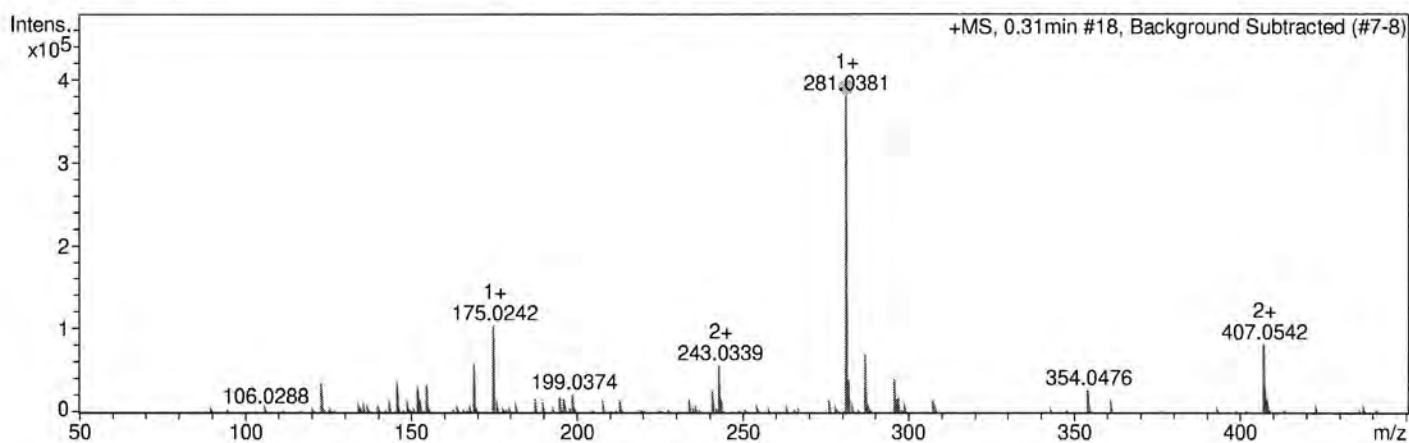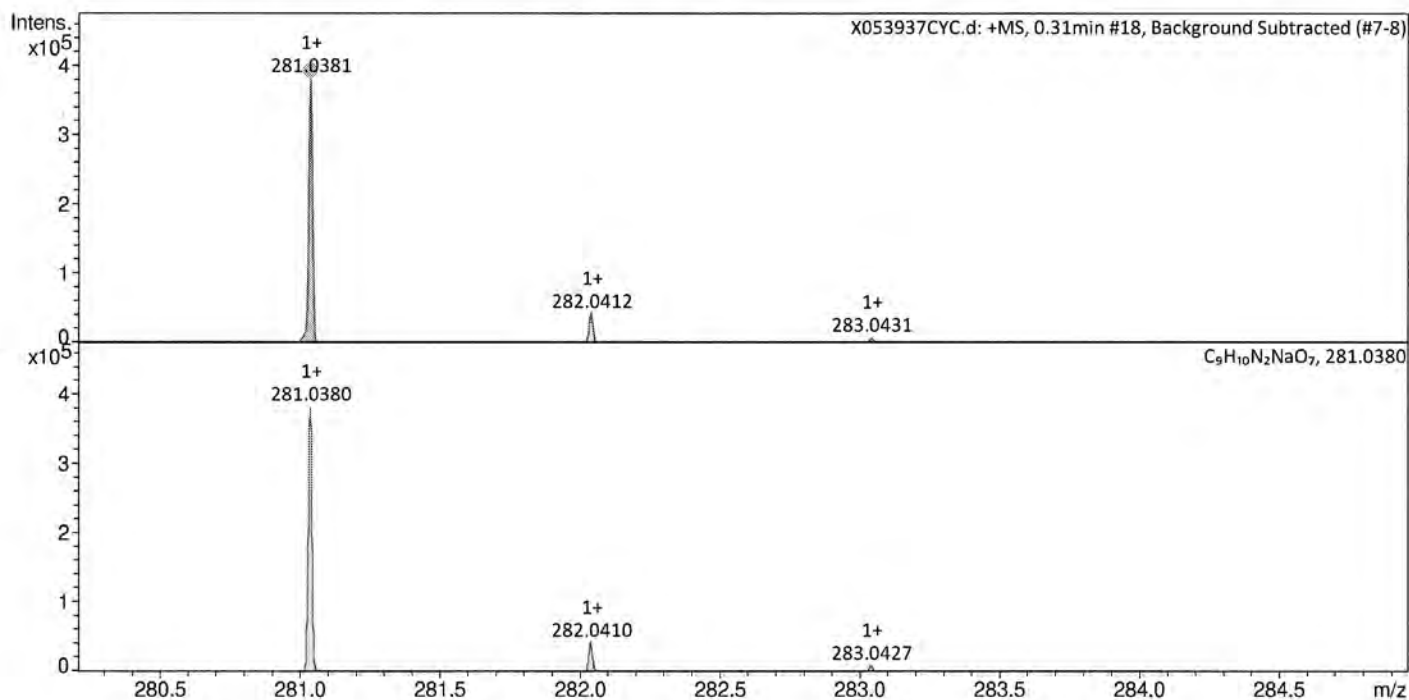

| Meas. m/z  | z  | # | Ion Formula                                                    | m/z        | err [ppm] | mSigma | rdb | e <sup>-</sup> | Conf |
|------------|----|---|----------------------------------------------------------------|------------|-----------|--------|-----|----------------|------|
| 281.038115 | 1+ | 1 | C <sub>9</sub> H <sub>10</sub> N <sub>2</sub> NaO <sub>7</sub> | 281.038021 | -0.3      | 1.1    | 6.0 | even           |      |

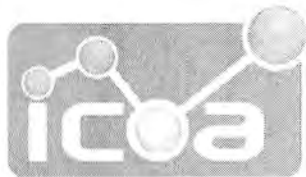

# Spectrométrie de Masse

## Demande d'analyse HRMS

### High-Resolution Mass Spectrometry analysis request form

|                                                                                                                               |                                                                                                                                                               |                                                                                        |
|-------------------------------------------------------------------------------------------------------------------------------|---------------------------------------------------------------------------------------------------------------------------------------------------------------|----------------------------------------------------------------------------------------|
| Demandeur (Nom+Prénom) :<br><b>Sava Alexandru</b><br>(Submitter's name) : <b>AS</b>                                           | Tél :<br>(Phone)                                                                                                                                              | Mail :<br>(E-mail)                                                                     |
| Nom de l'échantillon : <b>AS 311</b><br>(Sample name) <b>4f</b>                                                               | Confirmation :<br><input checked="" type="checkbox"/> Structure connue<br>(Known structure)                                                                   | Identification :<br><input type="checkbox"/> Structure inconnue<br>(Unknown structure) |
| Formule brute : <b>C<sub>10</sub>H<sub>13</sub>NO<sub>6</sub></b><br>(Molecular formula)                                      | <p>Structure :</p> <p>Chemical Formula: <b>C<sub>10</sub>H<sub>13</sub>NO<sub>6</sub></b><br/>Molecular Weight: <b>243.22</b></p> <p>(Chemical structure)</p> |                                                                                        |
| Masse moléculaire : <b>243,22</b><br>(Molecular weight)                                                                       |                                                                                                                                                               |                                                                                        |
| Solvant conseillé : <b>CH<sub>3</sub>OH</b><br>(Recommended solvent)                                                          |                                                                                                                                                               |                                                                                        |
| Concentration ou masse :<br>(Concentration or weight)<br><b>1 mg / 1mL</b>                                                    |                                                                                                                                                               |                                                                                        |
| Remarques (conservation, solvants déconseillés, toxicité...) :<br>(Notes: storage, sample handling precautions, toxicity ...) |                                                                                                                                                               |                                                                                        |
| Responsable : <b>Sylvain Routier</b><br>(Supervisor)                                                                          | Date : <b>06.03.2019</b><br>(Date)                                                                                                                            | Bon pour accord :<br>(Signed as agreed)                                                |

#### Partie réservée au service (For MS facility use only)

|                                                              |                                                   |                                    |
|--------------------------------------------------------------|---------------------------------------------------|------------------------------------|
| Position sur le rack :<br>(Position on the rack) <b>BB12</b> | Nom du fichier :<br>(File name) <b>X048617CYC</b> | Date :<br>(Date) <b>06/03/2019</b> |
| Remarques :<br>(Comments and suggestions)                    |                                                   |                                    |

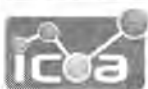

Analysis Info

Sample Name AS311  
Analysis Name X048617CYC.d

Acquisition Date 06/03/2019 18:28:41  
Instrument / Ser# maXis 255552.00086  
Method Positif.m

Acquisition Parameter

|             |          |                       |            |                |           |
|-------------|----------|-----------------------|------------|----------------|-----------|
| Source Type | ESI      | Ion Polarity          | Positive   | Set Nebulizer  | 0.6 Bar   |
| Scan Begin  | 50 m/z   | Set Capillary         | 4500 V     | Set Dry Heater | 200 °C    |
| Scan End    | 2500 m/z | Set Collision Cell RF | 1800.0 Vpp | Set Dry Gas    | 7.0 l/min |

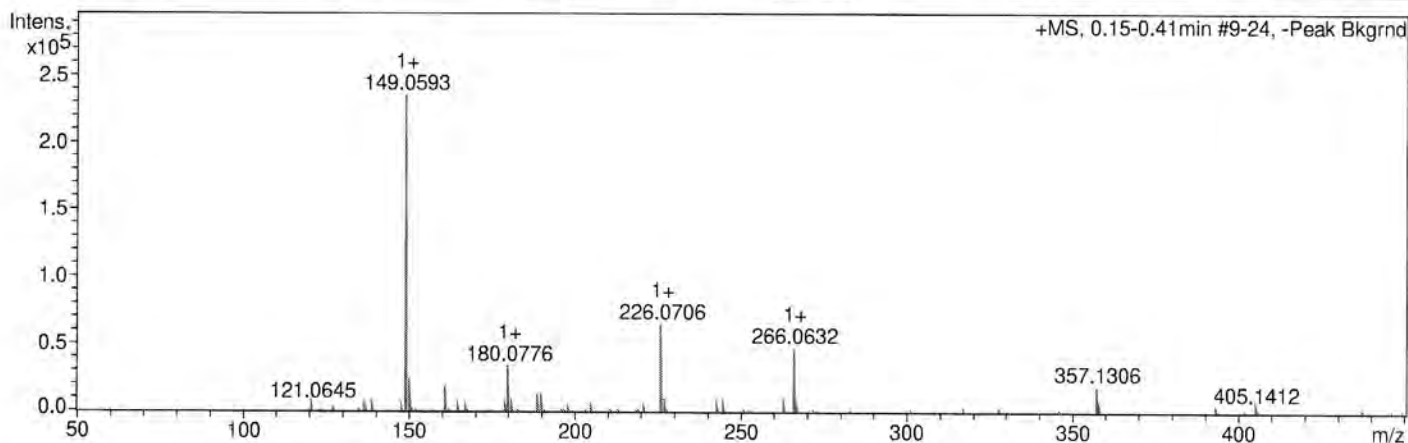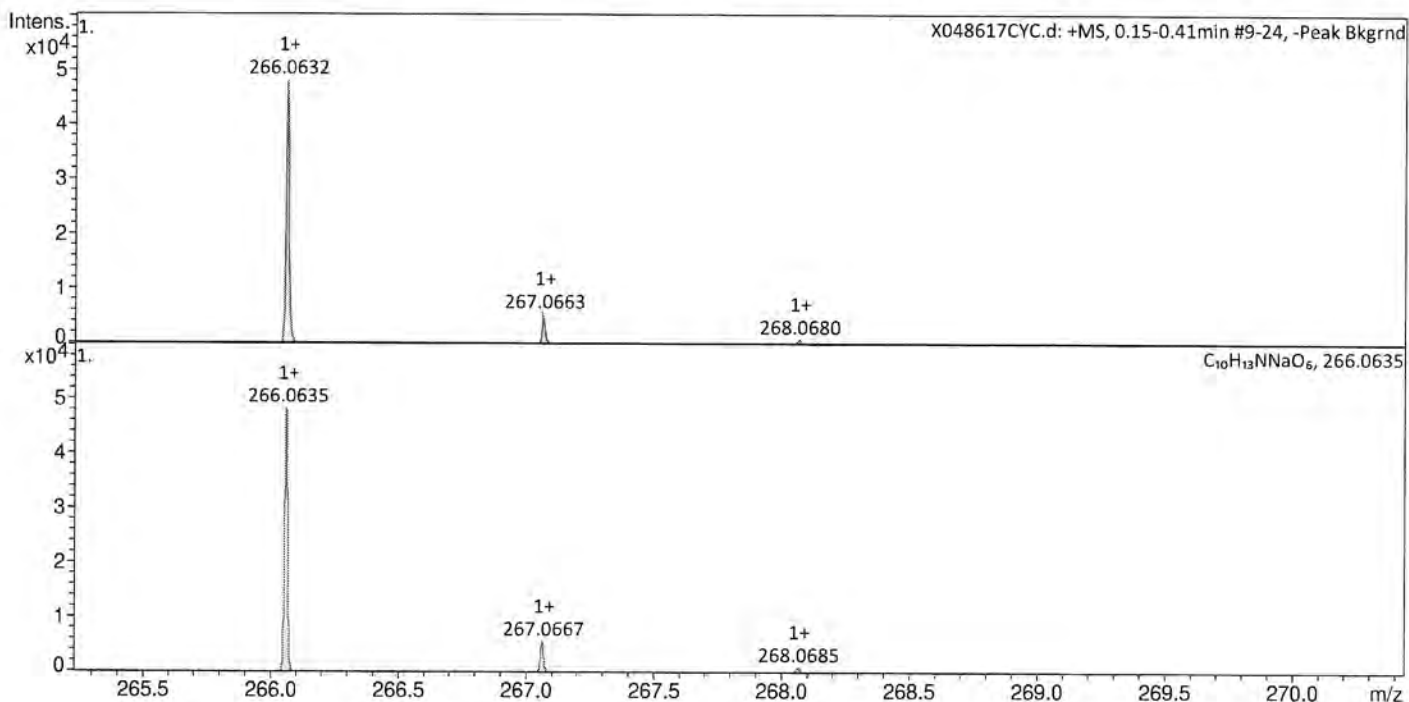

C<sub>10</sub>H<sub>13</sub>NNaO<sub>6</sub>, 266.0635

| Meas. m/z  | z  | # | Ion Formula | m/z        | err [ppm] | mSigma | rdB | e <sup>-</sup> | Conf |
|------------|----|---|-------------|------------|-----------|--------|-----|----------------|------|
| 149.059260 | 1+ | 1 | C9H9O2      | 149.059706 | 3.0       | 4.8    | 6.0 | even           |      |
| 180.077642 | 1+ | 1 | C10H12O3    | 180.078096 | 2.5       | 36.8   | 5.5 | odd            |      |
| 226.070622 | 1+ | 1 | C10H12NO5   | 226.070999 | 1.7       | 6.8    | 6.0 | even           |      |
| 266.063250 | 1+ | 1 | C10H13NNaO6 | 266.063508 | 1.0       | 3.7    | 5.0 | even           |      |

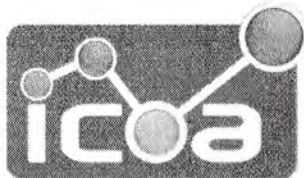

# Spectrométrie de Masse

## Demande d'analyse HRMS

### High-Resolution Mass Spectrometry analysis request form

|                                                                                                                               |                                                                                                                                                |                                                                                        |
|-------------------------------------------------------------------------------------------------------------------------------|------------------------------------------------------------------------------------------------------------------------------------------------|----------------------------------------------------------------------------------------|
| Demandeur (Nom+Prénom) :<br><b>Sava Alexandru</b><br>(Submitter's name) : <b>AS</b>                                           | Tél :<br>(Phone)                                                                                                                               | Mail :<br>(E-mail)                                                                     |
| Nom de l'échantillon : <b>AS 389</b><br>(Sample name) <b>5b</b>                                                               | Confirmation :<br><input checked="" type="checkbox"/> Structure connue<br>(Known structure)                                                    | Identification :<br><input type="checkbox"/> Structure inconnue<br>(Unknown structure) |
| Formule brute : <b>C<sub>9</sub>H<sub>9</sub>ClFNO<sub>4</sub></b><br>(Molecular formula)                                     | Structure :(Chemical structure)<br><br>Chemical Formula: <b>C<sub>9</sub>H<sub>9</sub>ClFNO<sub>4</sub></b><br>Molecular Weight: <b>249.62</b> |                                                                                        |
| Masse moléculaire : <b>249,62</b><br>(Molecular weight)                                                                       |                                                                                                                                                |                                                                                        |
| Solvant conseillé : <b>CH<sub>3</sub>OH</b><br>(Recommended solvent)                                                          |                                                                                                                                                |                                                                                        |
| Concentration ou masse :<br>(Concentration or weight)<br><b>1 mg / 1mL</b>                                                    |                                                                                                                                                |                                                                                        |
| Remarques (conservation, solvants déconseillés, toxicité...) :<br>(Notes: storage, sample handling precautions, toxicity ...) |                                                                                                                                                |                                                                                        |
| Responsable : <b>Sylvain Routier</b><br>(Supervisor)                                                                          | Date : <b>10.12.2019</b><br>(Date)                                                                                                             | Bon pour accord :<br>(Signed as agreed)                                                |

### Partie réservée au service (For MS facility use only)

|                                                             |                                                   |                                    |
|-------------------------------------------------------------|---------------------------------------------------|------------------------------------|
| Position sur le rack :<br>(Position on the rack) <b>GC9</b> | Nom du fichier :<br>(File name) <b>X053952CYC</b> | Date :<br>(Date) <b>10/12/2019</b> |
| Remarques :<br>(Comments and suggestions)                   |                                                   |                                    |

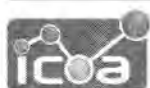

Analysis Info

Sample Name **AS389**  
Analysis Name X053952CYC\_Na.d

Acquisition Date 11/12/2019 20:32:43  
Instrument / Ser# maXis 255552.00086  
Method Positif.m

Acquisition Parameter

|             |          |                       |            |                |           |
|-------------|----------|-----------------------|------------|----------------|-----------|
| Source Type | ESI      | Ion Polarity          | Positive   | Set Nebulizer  | 0.6 Bar   |
| Scan Begin  | 50 m/z   | Set Capillary         | 4500 V     | Set Dry Heater | 200 °C    |
| Scan End    | 2500 m/z | Set Collision Cell RF | 1800.0 Vpp | Set Dry Gas    | 7.0 l/min |

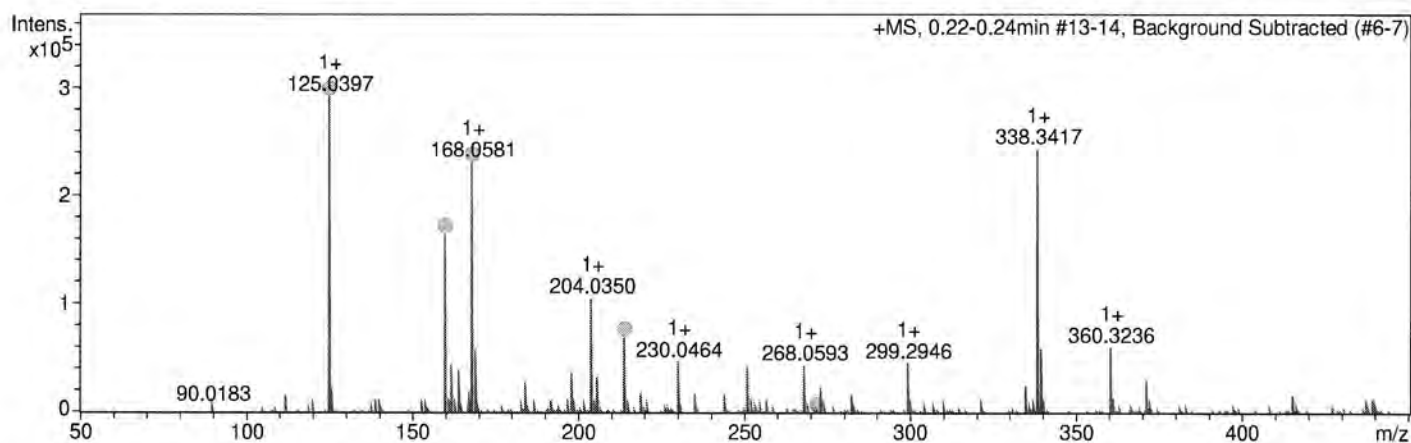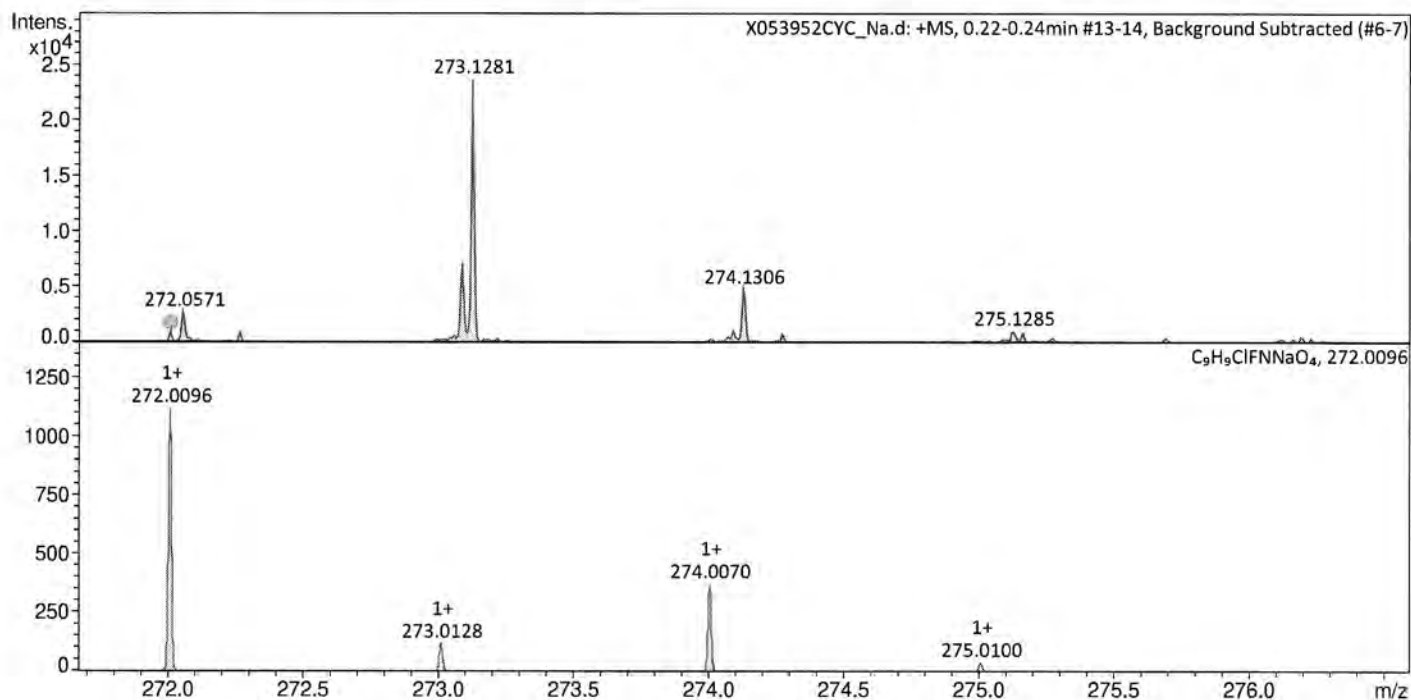

| Meas. m/z  | z  | # | Ion Formula  | m/z        | err [ppm] | mSigma | rdB | e <sup>-</sup> | Conf |
|------------|----|---|--------------|------------|-----------|--------|-----|----------------|------|
| 125.039695 | 1+ | 1 | C7H6FO       | 125.039719 | 0.2       | 0.8    | 5.0 | even           |      |
| 160.008665 | 1+ | 1 | C7H6ClFO     | 160.008572 | -0.6      | 23.9   | 4.5 | odd            |      |
| 168.058121 | 1+ | 1 | C9H9FO2      | 168.058109 | -0.1      | 88.6   | 5.5 | odd            |      |
| 214.051281 | 1+ | 1 | C9H9FNO4     | 214.051012 | -1.3      | 3.6    | 6.0 | even           |      |
| 272.009483 | 1+ | 1 | C9H9ClFNNaO4 | 272.009634 | 0.6       | n.a.   | 5.0 | even           |      |

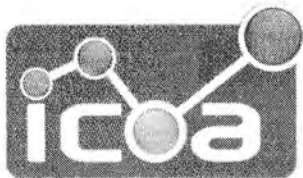

# Spectrométrie de Masse

## Demande d'analyse HRMS

### High-Resolution Mass Spectrometry analysis request form

|                                                                                                      |                                                                                                                               |                                                                                        |
|------------------------------------------------------------------------------------------------------|-------------------------------------------------------------------------------------------------------------------------------|----------------------------------------------------------------------------------------|
| Demandeur (Nom+Prénom) :<br><b>Sava Alexandru</b><br>(Submitter's name) : <b>AS</b>                  | Tél :<br>(Phone)                                                                                                              | Mail :<br>(E-mail)                                                                     |
| Nom de l'échantillon : <b>AS 380</b><br>(Sample name) <b>5e</b>                                      | Confirmation :<br><input checked="" type="checkbox"/> Structure connue<br>(Known structure)                                   | Identification :<br><input type="checkbox"/> Structure inconnue<br>(Unknown structure) |
| Formule brute : <b>C<sub>9</sub>H<sub>9</sub>ClN<sub>2</sub>O<sub>6</sub></b><br>(Molecular formula) | Structure : (Chemical structure)                                                                                              |                                                                                        |
| Masse moléculaire : <b>276,63</b><br>(Molecular weight)                                              |                                                                                                                               |                                                                                        |
| Solvant conseillé : <b>CH<sub>3</sub>OH</b><br>(Recommended solvent)                                 | Chemical Formula: <b>C<sub>9</sub>H<sub>9</sub>ClN<sub>2</sub>O<sub>6</sub></b><br>Molecular Weight: <b>276.63</b>            |                                                                                        |
| Concentration ou masse :<br>(Concentration or weight)<br><b>1 mg / 1mL</b>                           | Remarques (conservation, solvants déconseillés, toxicité...) :<br>(Notes: storage, sample handling precautions, toxicity ...) |                                                                                        |
| Responsable : <b>Sylvain Routier</b><br>(Supervisor)                                                 | Date : <b>10.12.2019</b><br>(Date)                                                                                            | Bon pour accord :<br>(Signed as agreed)                                                |

### Partie réservée au service (For MS facility use only)

|                                                              |                                                   |                                    |
|--------------------------------------------------------------|---------------------------------------------------|------------------------------------|
| Position sur le rack :<br>(Position on the rack) <b>GB12</b> | Nom du fichier :<br>(File name) <b>X053943CYC</b> | Date :<br>(Date) <b>10/12/2019</b> |
| Remarques :<br>(Comments and suggestions)                    |                                                   |                                    |

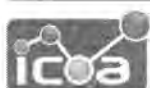

Analysis Info

Sample Name **AS380**  
Analysis Name X053943CYC.d

Acquisition Date 11/12/2019 17:46:43  
Instrument / Ser# maXis 255552.00086  
Method Positif.m

Acquisition Parameter

|             |          |                       |            |                |           |
|-------------|----------|-----------------------|------------|----------------|-----------|
| Source Type | ESI      | Ion Polarity          | Positive   | Set Nebulizer  | 0.6 Bar   |
| Scan Begin  | 50 m/z   | Set Capillary         | 4500 V     | Set Dry Heater | 200 °C    |
| Scan End    | 2500 m/z | Set Collision Cell RF | 1800.0 Vpp | Set Dry Gas    | 7.0 l/min |

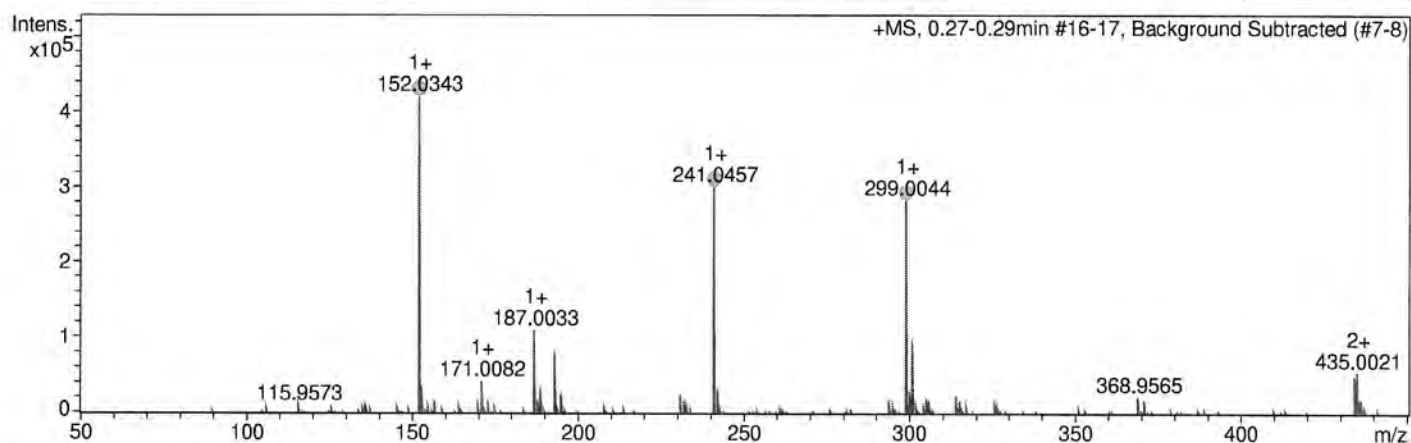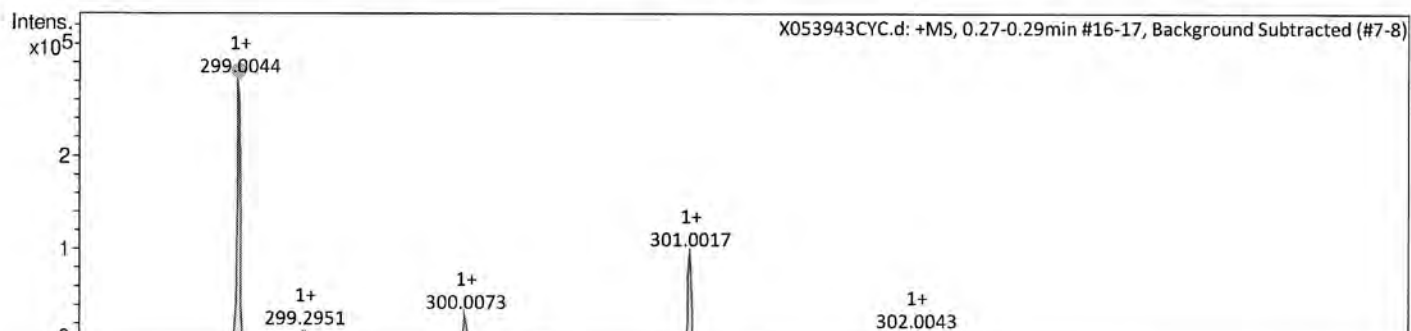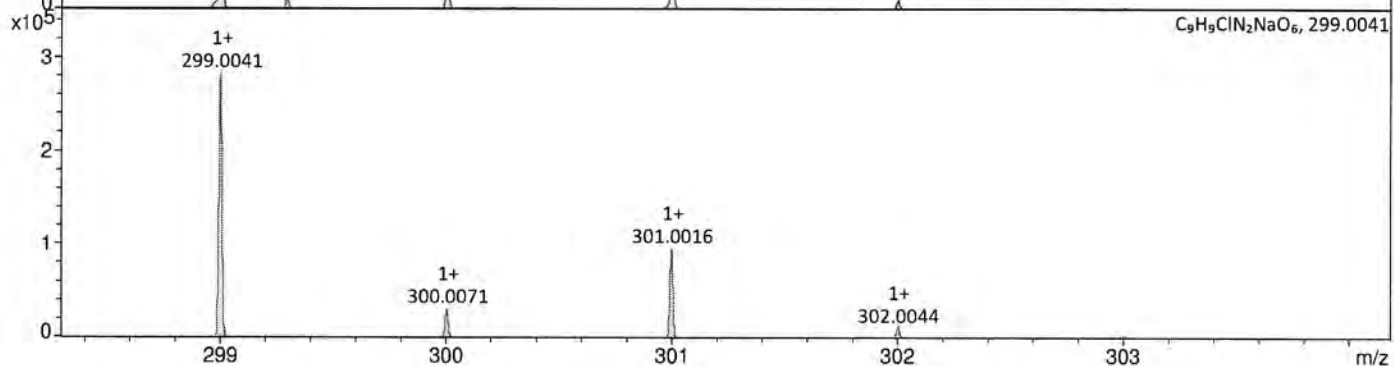

| Meas. m/z  | z  | # | Ion Formula  | m/z        | err [ppm] | mSigma | rdb | e <sup>-</sup> | Conf |
|------------|----|---|--------------|------------|-----------|--------|-----|----------------|------|
| 152.034253 | 1+ | 1 | C7H6NO3      | 152.034219 | -0.2      | 4.2    | 6.0 | even           |      |
| 241.045718 | 1+ | 1 | C9H9N2O6     | 241.045512 | -0.9      | 0.5    | 7.0 | even           |      |
| 299.004402 | 1+ | 1 | C9H9CIN2NaO6 | 299.004134 | -0.9      | 4.2    | 6.0 | even           |      |

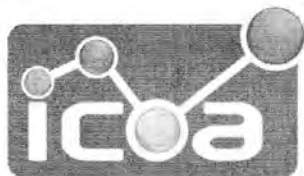

# Spectrométrie de Masse

## Demande d'analyse HRMS

### High-Resolution Mass Spectrometry analysis request form

|                                                                                                                               |                                                                                                                                                                                                  |                                                                                        |
|-------------------------------------------------------------------------------------------------------------------------------|--------------------------------------------------------------------------------------------------------------------------------------------------------------------------------------------------|----------------------------------------------------------------------------------------|
| Demandeur (Nom+Prénom) :<br><b>Sava Alexandru</b><br>(Submitter's name) : <b>AS</b>                                           | Tél :<br>(Phone)                                                                                                                                                                                 | Mail :<br>(E-mail)                                                                     |
| Nom de l'échantillon : <b>AS 335</b><br>(Sample name) <b>5h</b>                                                               | Confirmation :<br><input checked="" type="checkbox"/> Structure connue<br>(Known structure)                                                                                                      | Identification :<br><input type="checkbox"/> Structure inconnue<br>(Unknown structure) |
| Formule brute : $C_{11}H_{14}ClNO_6$<br>(Molecular formula)                                                                   | Structure :<br>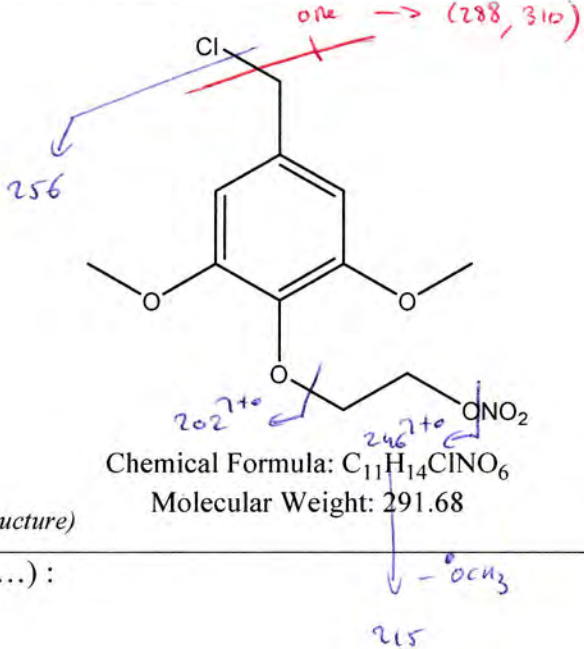<br>Chemical Formula: $C_{11}H_{14}ClNO_6$<br>Molecular Weight: 291.68<br>(Chemical structure) |                                                                                        |
| Masse moléculaire : 291,68<br>(Molecular weight)                                                                              |                                                                                                                                                                                                  |                                                                                        |
| Solvant conseillé : $CH_3OH$<br>(Recommended solvent)                                                                         |                                                                                                                                                                                                  |                                                                                        |
| Concentration ou masse :<br>(Concentration or weight)<br><b>1 mg / 1mL</b>                                                    |                                                                                                                                                                                                  |                                                                                        |
| Remarques (conservation, solvants déconseillés, toxicité...) :<br>(Notes: storage, sample handling precautions, toxicity ...) |                                                                                                                                                                                                  |                                                                                        |
| Responsable : Sylvain Routier<br>(Supervisor)                                                                                 | Date : 12.03.2019<br>(Date)                                                                                                                                                                      | Bon pour accord :<br>(Signed as agreed)                                                |

### Partie réservée au service (For MS facility use only)

|                                                              |                                                   |                                    |
|--------------------------------------------------------------|---------------------------------------------------|------------------------------------|
| Position sur le rack :<br>(Position on the rack) <b>GD11</b> | Nom du fichier :<br>(File name) <b>X048795CYC</b> | Date :<br>(Date) <b>13/03/2019</b> |
| Remarques :<br>(Comments and suggestions)                    |                                                   |                                    |

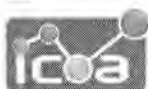

## Analysis Info

Sample Name **AS335**  
Analysis Name X048795CYC.d

Acquisition Date 13/03/2019 19:29:02  
Instrument / Ser# maXis 255552.00086  
Method positif-6.m

## Acquisition Parameter

|             |          |                       |            |                |           |
|-------------|----------|-----------------------|------------|----------------|-----------|
| Source Type | ESI      | Ion Polarity          | Positive   | Set Nebulizer  | 0.6 Bar   |
| Scan Begin  | 50 m/z   | Set Capillary         | 4500 V     | Set Dry Heater | 200 °C    |
| Scan End    | 2500 m/z | Set Collision Cell RF | 1800.0 Vpp | Set Dry Gas    | 7.0 l/min |

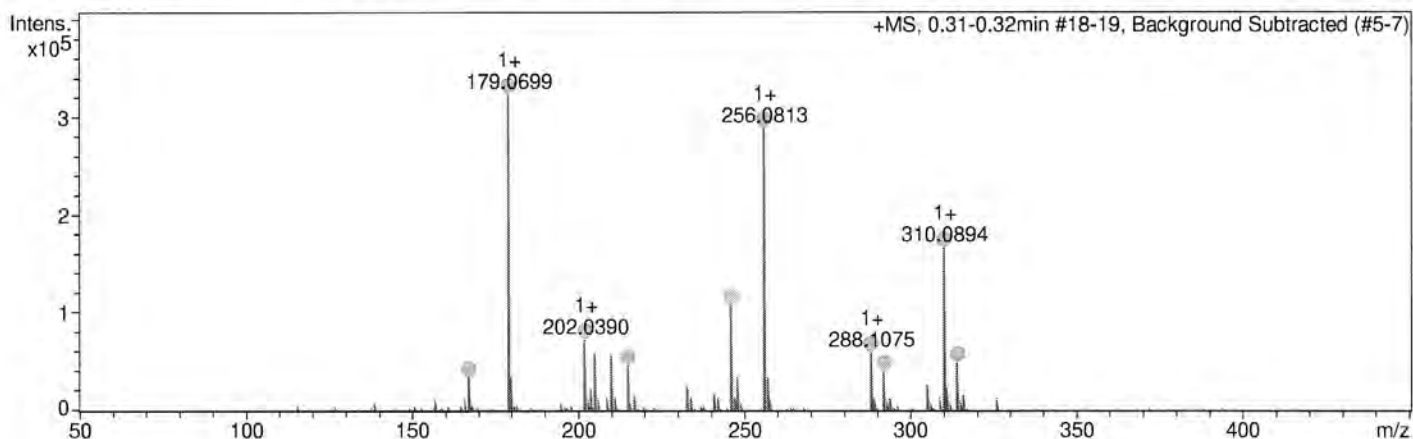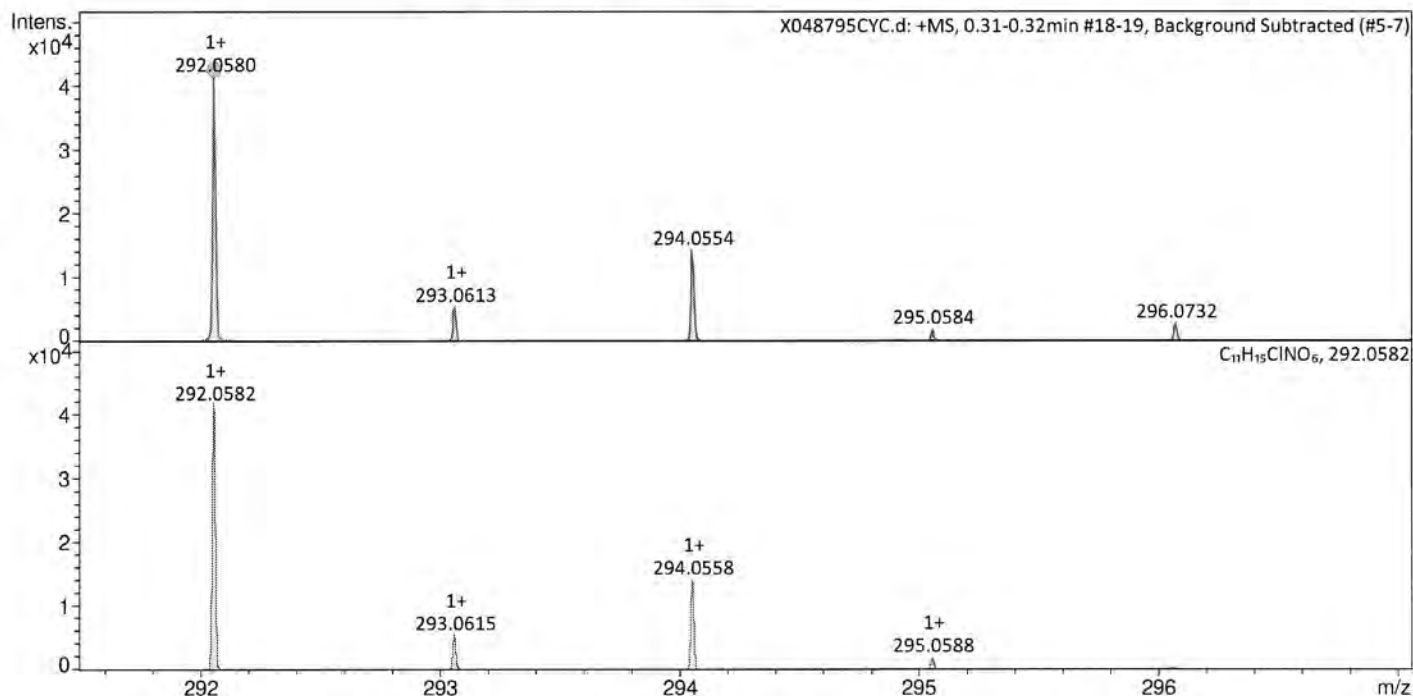

| Meas. m/z  | z  | # | Ion Formula | m/z        | err [ppm] | mSigma | rdb | e <sup>-</sup> Conf |
|------------|----|---|-------------|------------|-----------|--------|-----|---------------------|
| 167.069848 | 1+ | 1 | C9H11O3     | 167.070271 | 2.5       | 4.4    | 5.0 | even                |
| 179.069931 | 1+ | 1 | C10H11O3    | 179.070271 | 1.9       | 1.2    | 6.0 | even                |
| 202.038986 | 1+ | 1 | C9H11ClO3   | 202.039123 | 0.7       | 11.0   | 4.5 | odd                 |
| 215.046623 | 1+ | 1 | C10H12ClO3  | 215.046948 | 1.5       | 4.0    | 5.0 | even                |
| 246.065056 | 1+ | 1 | C11H15ClO4  | 246.065338 | 1.1       | 7.6    | 4.5 | odd                 |
| 256.081307 | 1+ | 1 | C11H14NO6   | 256.081564 | 1.0       | 3.6    | 6.0 | even                |
| 288.107472 | 1+ | 1 | C12H18NO7   | 288.107778 | 1.1       | 9.5    | 5.0 | even                |
| 292.057966 | 1+ | 1 | C11H15ClNO6 | 292.058241 | 0.9       | 2.0    | 5.0 | even                |

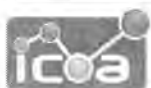

| Meas. m/z  | z  | # | Ion Formula   | m/z        | err [ppm] | mSigma | rdb | e <sup>-</sup> | Conf |
|------------|----|---|---------------|------------|-----------|--------|-----|----------------|------|
| 310.089446 | 1+ | 1 | C12H17NNaO7   | 310.089723 | 0.9       | 2.1    | 5.0 | even           |      |
| 314.040125 | 1+ | 1 | C11H14ClNNaO6 | 314.040186 | 0.2       | 14.0   | 5.0 | even           |      |

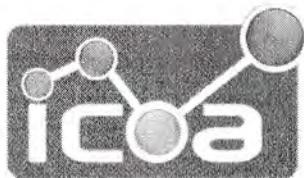

# Spectrométrie de Masse

## Demande d'analyse HRMS

### High-Resolution Mass Spectrometry analysis request form

|                                                                                                                               |                                                                                                                                                                                                                         |                                                                                        |
|-------------------------------------------------------------------------------------------------------------------------------|-------------------------------------------------------------------------------------------------------------------------------------------------------------------------------------------------------------------------|----------------------------------------------------------------------------------------|
| Demandeur (Nom+Prénom) :<br><b>Sava Alexandru</b><br>(Submitter's name) : <b>AS</b>                                           | Tél :<br>(Phone)                                                                                                                                                                                                        | Mail :<br>(E-mail)                                                                     |
| Nom de l'échantillon : <b>AS 382</b><br>(Sample name) <b>5k</b>                                                               | Confirmation :<br><input checked="" type="checkbox"/> Structure connue<br>(Known structure)                                                                                                                             | Identification :<br><input type="checkbox"/> Structure inconnue<br>(Unknown structure) |
| Formule brute : <b>C<sub>9</sub>H<sub>9</sub>ClN<sub>2</sub>O<sub>6</sub></b><br>(Molecular formula)                          | Structure : (Chemical structure)                                                                                                                                                                                        |                                                                                        |
| Masse moléculaire : <b>276,63</b><br>(Molecular weight)                                                                       | 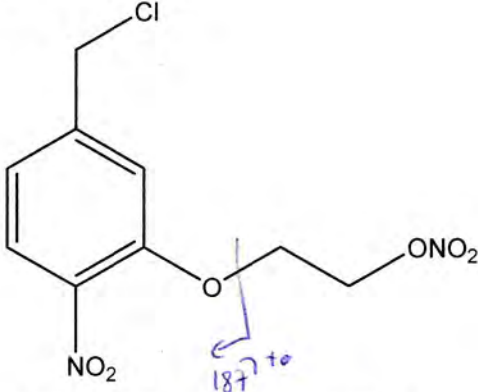 <p>Chemical Formula: <b>C<sub>9</sub>H<sub>9</sub>ClN<sub>2</sub>O<sub>6</sub></b><br/>         Molecular Weight: <b>276.63</b></p> |                                                                                        |
| Solvant conseillé : <b>CH<sub>3</sub>OH</b><br>(Recommended solvent)                                                          |                                                                                                                                                                                                                         |                                                                                        |
| Concentration ou masse :<br>(Concentration or weight)<br><b>1 mg / 1mL</b>                                                    |                                                                                                                                                                                                                         |                                                                                        |
| Remarques (conservation, solvants déconseillés, toxicité...) :<br>(Notes: storage, sample handling precautions, toxicity ...) |                                                                                                                                                                                                                         |                                                                                        |
| Responsable : <b>Sylvain Routier</b><br>(Supervisor)                                                                          | Date : <b>10.12.2019</b><br>(Date)                                                                                                                                                                                      | Bon pour accord :<br>(Signed as agreed)                                                |

### Partie réservée au service (For MS facility use only)

|                                                             |                                                   |                                    |
|-------------------------------------------------------------|---------------------------------------------------|------------------------------------|
| Position sur le rack :<br>(Position on the rack) <b>GC2</b> | Nom du fichier :<br>(File name) <b>X053945CYC</b> | Date :<br>(Date) <b>10/12/2019</b> |
| Remarques :<br>(Comments and suggestions)                   |                                                   |                                    |

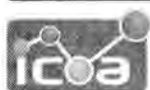

Analysis Info

Sample Name **AS382**  
Analysis Name X053945CYC.d

Acquisition Date 11/12/2019 17:49:39  
Instrument / Ser# maXis 255552.00086  
Method Positif.m

Acquisition Parameter

|             |          |                       |            |                |           |
|-------------|----------|-----------------------|------------|----------------|-----------|
| Source Type | ESI      | Ion Polarity          | Positive   | Set Nebulizer  | 0.6 Bar   |
| Scan Begin  | 50 m/z   | Set Capillary         | 4500 V     | Set Dry Heater | 200 °C    |
| Scan End    | 2500 m/z | Set Collision Cell RF | 1800.0 Vpp | Set Dry Gas    | 7.0 l/min |

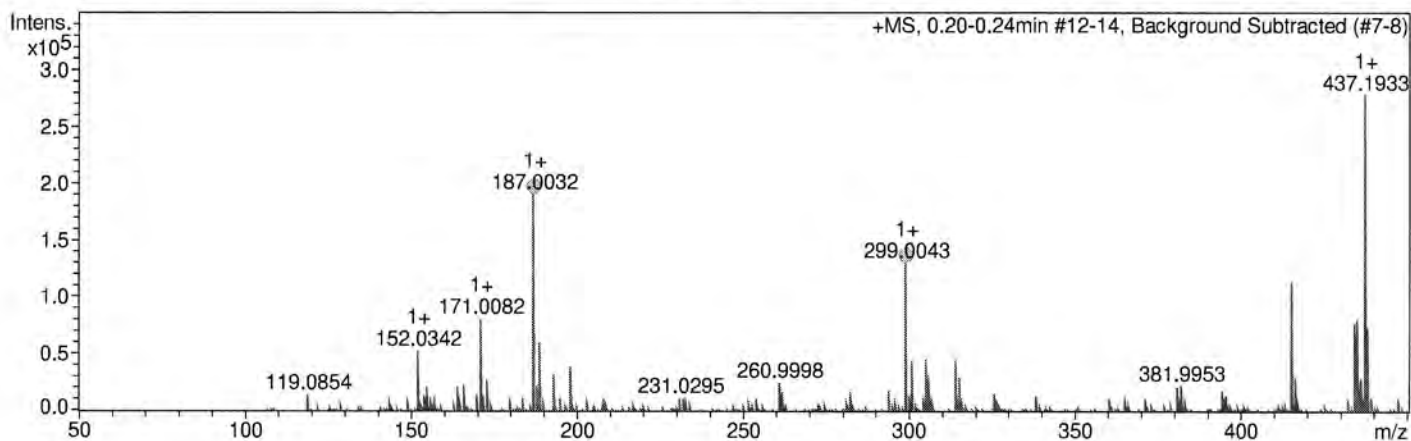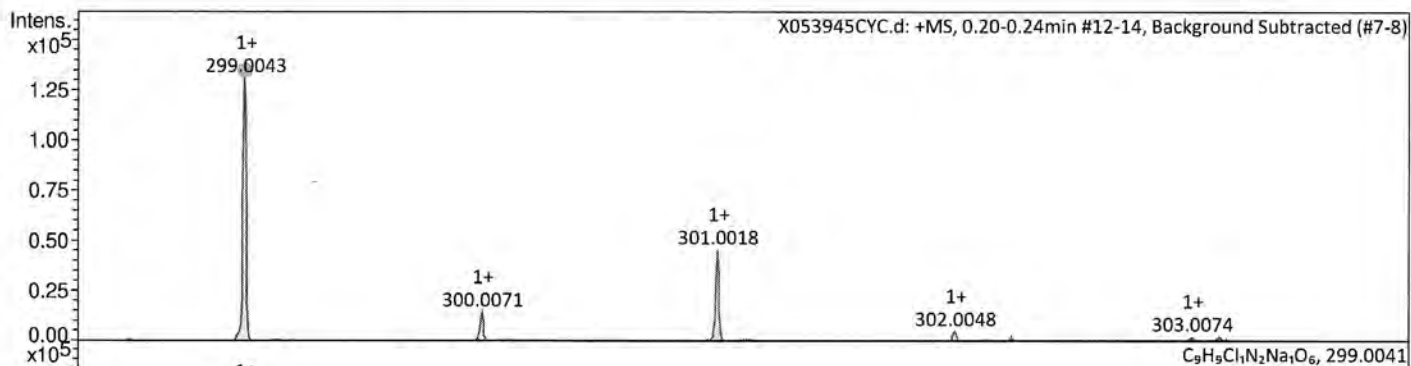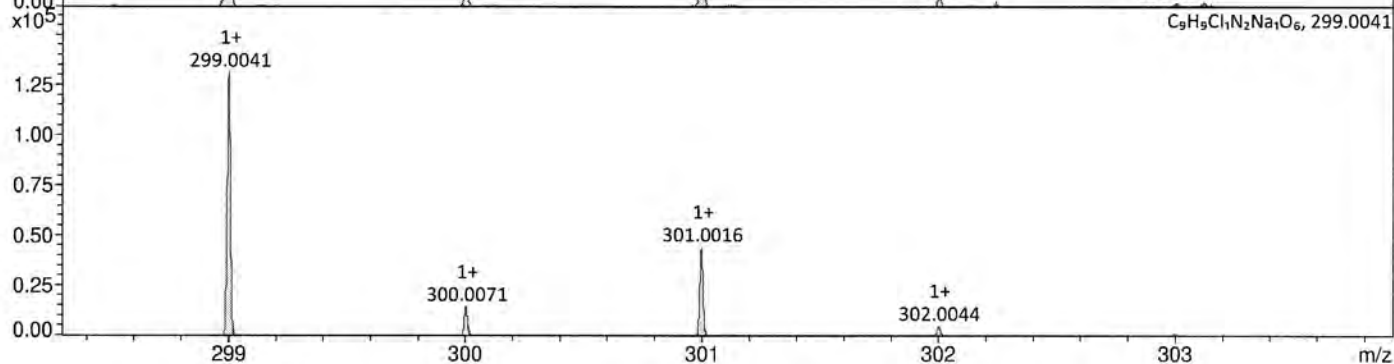

| Meas. m/z  | z  | # | Ion Formula   | m/z        | err [ppm] | mSigma | rdb | e <sup>-</sup> | Conf |
|------------|----|---|---------------|------------|-----------|--------|-----|----------------|------|
| 187.003209 | 1+ | 1 | C7H6ClNO3     | 187.003072 | -0.7      | 20.5   | 5.5 | odd            |      |
| 299.004346 | 1+ | 1 | C9H9ClIN2NaO6 | 299.004134 | -0.7      | 5.0    | 6.0 | even           |      |

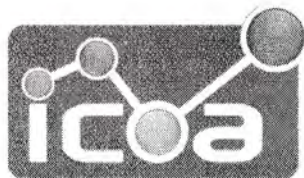

# Spectrométrie de Masse

## Demande d'analyse HRMS

### High-Resolution Mass Spectrometry analysis request form

|                                                                                                                               |                                                                                                  |                                                                                        |
|-------------------------------------------------------------------------------------------------------------------------------|--------------------------------------------------------------------------------------------------|----------------------------------------------------------------------------------------|
| Demandeur (Nom+Prénom) :<br><b>Sava Alexandru</b><br>(Submitter's name) : <b>AS</b>                                           | Tél :<br>(Phone)                                                                                 | Mail :<br>(E-mail)                                                                     |
| Nom de l'échantillon : <b>AS 386</b><br>(Sample name) <b>51</b>                                                               | Confirmation :<br><input checked="" type="checkbox"/> Structure connue<br>(Known structure)      | Identification :<br><input type="checkbox"/> Structure inconnue<br>(Unknown structure) |
| Formule brute : $C_{10}H_{11}Cl_2NO_5$<br>(Molecular formula)                                                                 | Structure : (Chemical structure)                                                                 |                                                                                        |
| Masse moléculaire : 296,10<br>(Molecular weight)                                                                              | <p>Chemical Formula: <math>C_{10}H_{11}Cl_2NO_5</math><br/>         Molecular Weight: 296.10</p> |                                                                                        |
| Solvant conseillé : $CH_3OH$<br>(Recommended solvent)                                                                         |                                                                                                  |                                                                                        |
| Concentration ou masse :<br>(Concentration or weight)<br>1 mg / 1mL                                                           |                                                                                                  |                                                                                        |
| Remarques (conservation, solvants déconseillés, toxicité...) :<br>(Notes: storage, sample handling precautions, toxicity ...) |                                                                                                  |                                                                                        |
| Responsable : Sylvain Routier<br>(Supervisor)                                                                                 | Date : 10.12.2019<br>(Date)                                                                      | Bon pour accord :<br>(Signed as agreed)                                                |

### Partie réservée au service (For MS facility use only)

|                                                             |                                                   |                                    |
|-------------------------------------------------------------|---------------------------------------------------|------------------------------------|
| Position sur le rack :<br>(Position on the rack) <b>GC6</b> | Nom du fichier :<br>(File name) <b>X053949CYC</b> | Date :<br>(Date) <b>10/12/2019</b> |
| Remarques :<br>(Comments and suggestions)                   |                                                   |                                    |

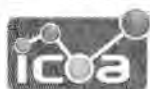

Analysis Info

Sample Name **AS386**  
Analysis Name X053949CYC.d

Acquisition Date 11/12/2019 17:55:38  
Instrument / Ser# maXis 255552.00086  
Method Positif.m

Acquisition Parameter

|             |          |                       |            |                |           |
|-------------|----------|-----------------------|------------|----------------|-----------|
| Source Type | ESI      | Ion Polarity          | Positive   | Set Nebulizer  | 0.6 Bar   |
| Scan Begin  | 50 m/z   | Set Capillary         | 4500 V     | Set Dry Heater | 200 °C    |
| Scan End    | 2500 m/z | Set Collision Cell RF | 1800.0 Vpp | Set Dry Gas    | 7.0 l/min |

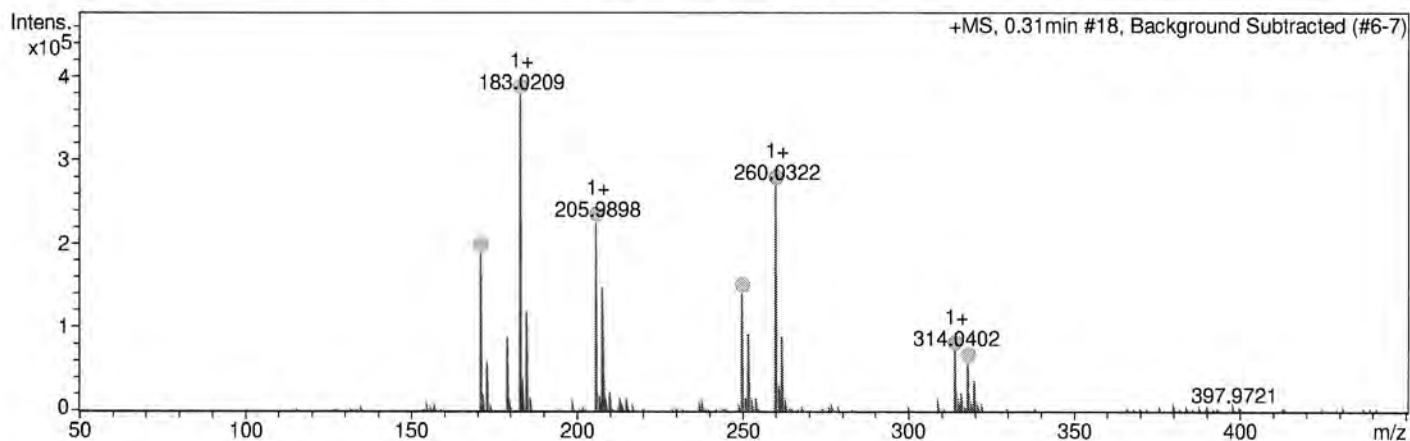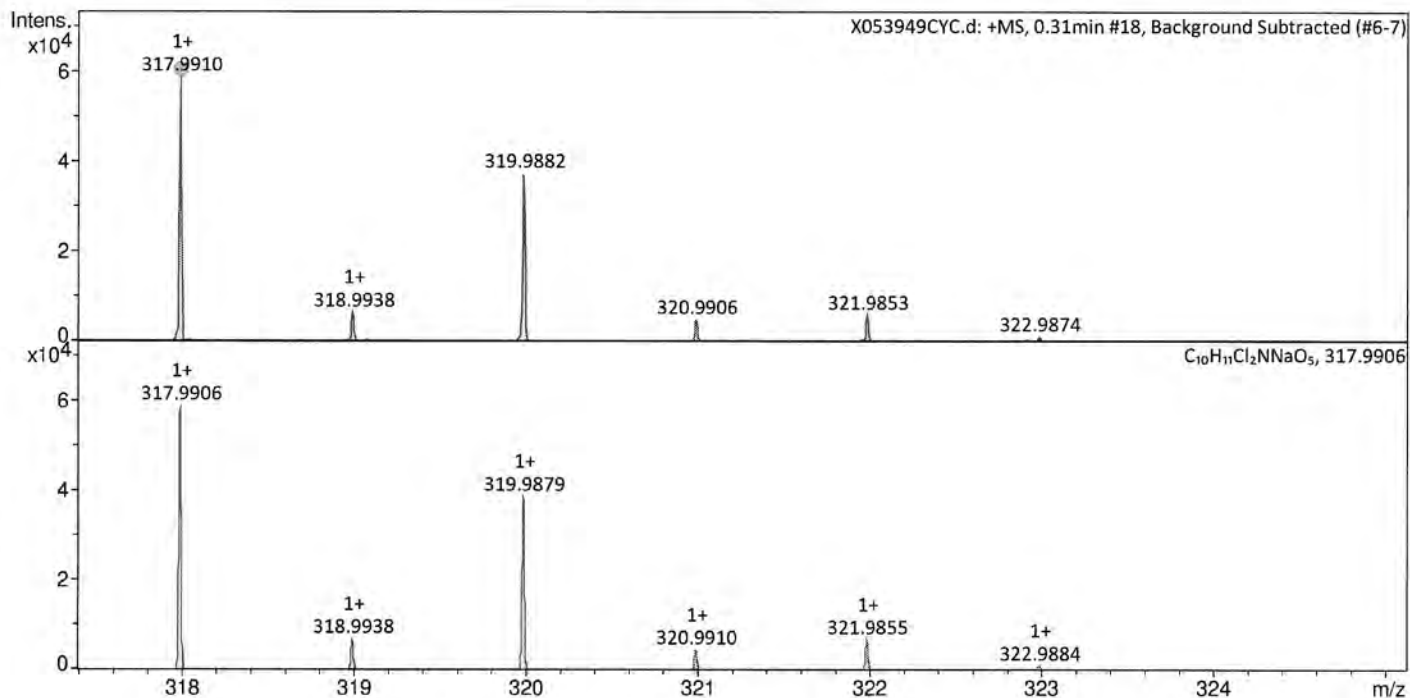

| Meas. m/z  | z  | # | Ion Formula    | m/z        | err [ppm] | mSigma | rdb | e <sup>-</sup> | Conf |
|------------|----|---|----------------|------------|-----------|--------|-----|----------------|------|
| 171.020812 | 1+ | 1 | C8H8ClO2       | 171.020734 | -0.5      | 7.3    | 5.0 | even           |      |
| 183.020856 | 1+ | 1 | C9H8ClO2       | 183.020734 | -0.7      | 6.7    | 6.0 | even           |      |
| 205.989788 | 1+ | 1 | C8H8Cl2O2      | 205.989586 | -1.0      | 3.4    | 4.5 | odd            |      |
| 250.016015 | 1+ | 1 | C10H12Cl2O3    | 250.015801 | -0.9      | 4.9    | 4.5 | odd            |      |
| 260.032228 | 1+ | 1 | C10H11ClNO5    | 260.032027 | -0.8      | 1.4    | 6.0 | even           |      |
| 314.040197 | 1+ | 1 | C11H14ClNNaO6  | 314.040186 | -0.0      | 17.4   | 5.0 | even           |      |
| 317.990984 | 1+ | 1 | C10H11Cl2NNaO5 | 317.990649 | -1.1      | 11.8   | 5.0 | even           |      |

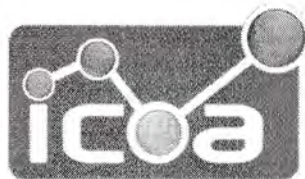

# Spectrométrie de Masse

## Demande d'analyse HRMS

### High-Resolution Mass Spectrometry analysis request form

|                                                                                                                               |                                                                                                                                                                                                |                                                                                        |
|-------------------------------------------------------------------------------------------------------------------------------|------------------------------------------------------------------------------------------------------------------------------------------------------------------------------------------------|----------------------------------------------------------------------------------------|
| Demandeur (Nom+Prénom) :<br><b>Sava Alexandru</b><br>(Submitter's name) : <b>AS</b>                                           | Tél :<br>(Phone)                                                                                                                                                                               | Mail :<br>(E-mail)                                                                     |
| Nom de l'échantillon : <b>AS 383</b><br>(Sample name)<br><b>5m</b>                                                            | Confirmation :<br><input checked="" type="checkbox"/> Structure connue<br>(Known structure)                                                                                                    | Identification :<br><input type="checkbox"/> Structure inconnue<br>(Unknown structure) |
| Formule brute : $C_{10}H_{11}BrClNO_5$<br>(Molecular formula)                                                                 | Structure :(Chemical structure)<br>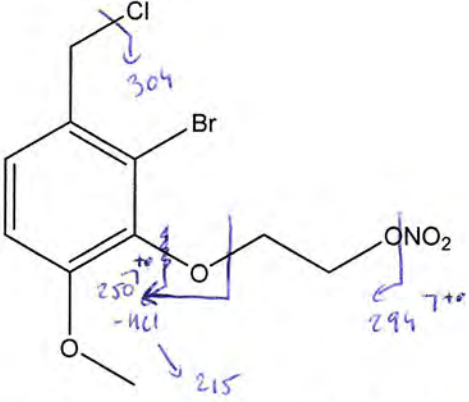<br>Chemical Formula: $C_{10}H_{11}BrClNO_5$<br>Molecular Weight: 340.55 |                                                                                        |
| Masse moléculaire : 340,55<br>(Molecular weight)                                                                              |                                                                                                                                                                                                |                                                                                        |
| Solvant conseillé : $CH_3OH$<br>(Recommended solvent)                                                                         |                                                                                                                                                                                                |                                                                                        |
| Concentration ou masse :<br>(Concentration or weight)<br><b>1 mg / 1mL</b>                                                    |                                                                                                                                                                                                |                                                                                        |
| Remarques (conservation, solvants déconseillés, toxicité...) :<br>(Notes: storage, sample handling precautions, toxicity ...) |                                                                                                                                                                                                |                                                                                        |
| Responsable : Sylvain Routier<br>(Supervisor)                                                                                 | Date : 10.12.2019<br>(Date)                                                                                                                                                                    | Bon pour accord :<br>(Signed as agreed)                                                |

### Partie réservée au service (For MS facility use only)

|                                                             |                                                   |                                    |
|-------------------------------------------------------------|---------------------------------------------------|------------------------------------|
| Position sur le rack :<br>(Position on the rack) <b>GC3</b> | Nom du fichier :<br>(File name) <b>X053946CYC</b> | Date :<br>(Date) <b>10/12/2019</b> |
| Remarques :<br>(Comments and suggestions)                   |                                                   |                                    |

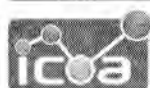

Analysis Info

Sample Name **AS383**  
Analysis Name X053946CYC.d

Acquisition Date 11/12/2019 17:51:08  
Instrument / Ser# maXis 255552.00086  
Method Positif.m

Acquisition Parameter

|             |          |                       |            |                |           |
|-------------|----------|-----------------------|------------|----------------|-----------|
| Source Type | ESI      | Ion Polarity          | Positive   | Set Nebulizer  | 0.6 Bar   |
| Scan Begin  | 50 m/z   | Set Capillary         | 4500 V     | Set Dry Heater | 200 °C    |
| Scan End    | 2500 m/z | Set Collision Cell RF | 1800.0 Vpp | Set Dry Gas    | 7.0 l/min |

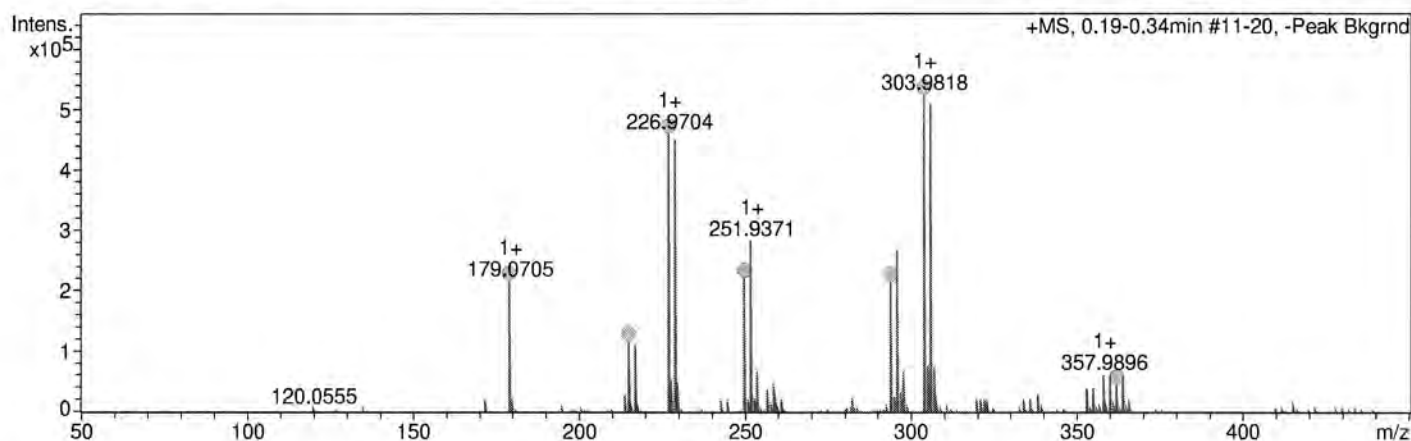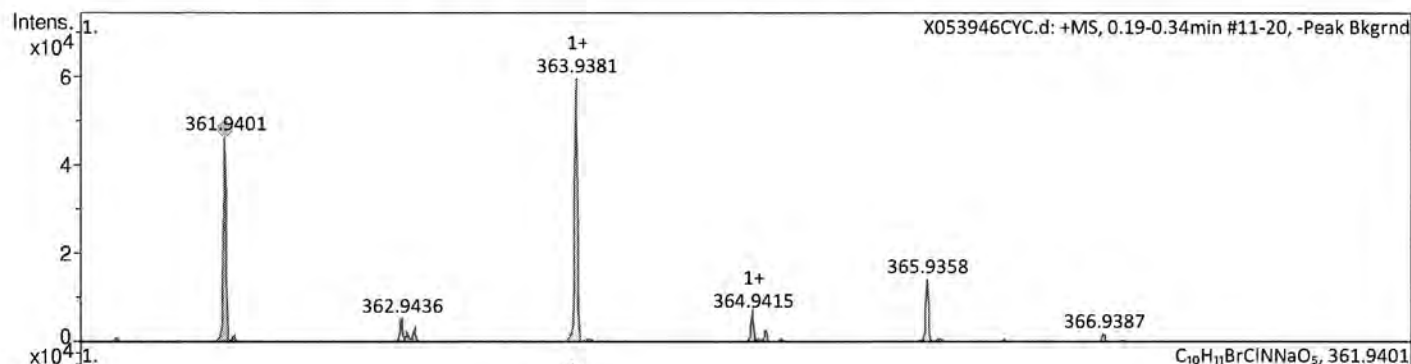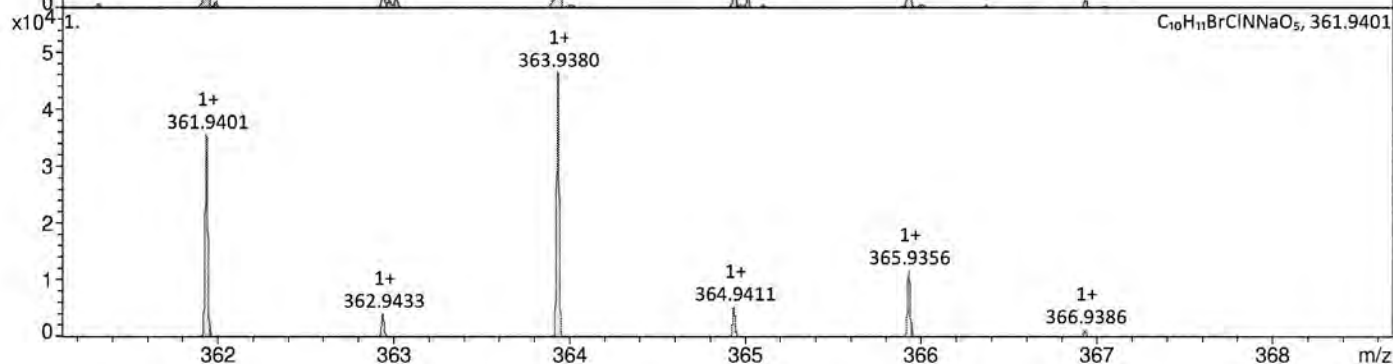

| Meas. m/z  | z  | # | Ion Formula     | m/z        | err [ppm] | mSigma | rdb | e <sup>-</sup> | Conf |
|------------|----|---|-----------------|------------|-----------|--------|-----|----------------|------|
| 179.070462 | 1+ | 1 | C10H11O3        | 179.070271 | -1.1      | 1.7    | 6.0 | even           |      |
| 214.970325 | 1+ | 1 | C8H8BrO2        | 214.970218 | -0.5      | 18.4   | 5.0 | even           |      |
| 226.970423 | 1+ | 1 | C9H8BrO2        | 226.970218 | -0.9      | 10.6   | 6.0 | even           |      |
| 249.939272 | 1+ | 1 | C8H8BrClO2      | 249.939071 | -0.8      | 7.4    | 4.5 | odd            |      |
| 293.965514 | 1+ | 1 | C10H12BrClO3    | 293.965285 | -0.8      | 18.8   | 4.5 | odd            |      |
| 303.981839 | 1+ | 1 | C10H11BrNO5     | 303.981511 | -1.1      | 24.1   | 6.0 | even           |      |
| 361.940123 | 1+ | 1 | C10H11BrClNNaO5 | 361.940133 | 0.0       | 8.9    | 5.0 | even           |      |

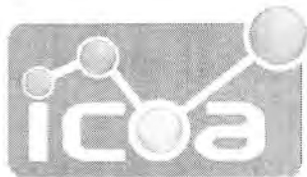

## Spectrométrie de Masse

## Demande d'analyse HRMS

## High-Resolution Mass Spectrometry analysis request form

|                                                                                                         |                                                                                                                               |                                                                                        |
|---------------------------------------------------------------------------------------------------------|-------------------------------------------------------------------------------------------------------------------------------|----------------------------------------------------------------------------------------|
| Demandeur (Nom+Prénom) :<br><b>Sava Alexandru</b><br>(Submitter's name) : <b>AS</b>                     | Tél :<br>(Phone)                                                                                                              | Mail :<br>(E-mail)                                                                     |
| Nom de l'échantillon : <b>AS 315</b><br>(Sample name) <b>8a</b>                                         | Confirmation :<br><input checked="" type="checkbox"/> Structure connue<br>(Known structure)                                   | Identification :<br><input type="checkbox"/> Structure inconnue<br>(Unknown structure) |
| Formule brute : <b>C<sub>29</sub>H<sub>25</sub>ClN<sub>4</sub>O<sub>7</sub>S</b><br>(Molecular formula) | Structure :<br>(Chemical structure)                                                                                           |                                                                                        |
| Masse moléculaire : <b>609,05</b><br>(Molecular weight)                                                 |                                                                                                                               |                                                                                        |
| Solvant conseillé : <b>Acetone</b><br>(Recommended solvent)                                             | Chemical Formula: <b>C<sub>29</sub>H<sub>25</sub>ClN<sub>4</sub>O<sub>7</sub>S</b><br>Molecular Weight: <b>609.05</b>         |                                                                                        |
| Concentration ou masse :<br>(Concentration or weight)<br><b>1 mg / 1mL</b>                              | Remarques (conservation, solvants déconseillés, toxicité...) :<br>(Notes: storage, sample handling precautions, toxicity ...) |                                                                                        |
| Responsable : <b>Sylvain Routier</b><br>(Supervisor)                                                    | Date : <b>26.03.2018</b><br>(Date)                                                                                            | Bon pour accord :<br>(Signed as agreed)                                                |

 Partie réservée au service  
 (For MS facility use only)

|                                                              |                                                   |                                    |
|--------------------------------------------------------------|---------------------------------------------------|------------------------------------|
| Position sur le rack :<br>(Position on the rack) <b>GE10</b> | Nom du fichier :<br>(File name) <b>X048806CYC</b> | Date :<br>(Date) <b>13/03/2019</b> |
| Remarques :<br>(Comments and suggestions)                    |                                                   |                                    |

*m/z 333<sup>2+</sup>, 342<sup>2+</sup> = [A+Ca+H<sub>2</sub>O]<sup>2+</sup>, [A+Ca+2H<sub>2</sub>O]<sup>2+</sup>*

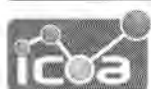

Analysis Info

Sample Name **AS315**  
Analysis Name X048806CYC.d

Acquisition Date 13/03/2019 19:46:45  
Instrument / Ser# maXis 255552.00086  
Method positif-6.m

Acquisition Parameter

|             |          |                       |            |                |           |
|-------------|----------|-----------------------|------------|----------------|-----------|
| Source Type | ESI      | Ion Polarity          | Positive   | Set Nebulizer  | 0.6 Bar   |
| Scan Begin  | 50 m/z   | Set Capillary         | 4500 V     | Set Dry Heater | 200 °C    |
| Scan End    | 2500 m/z | Set Collision Cell RF | 1800.0 Vpp | Set Dry Gas    | 7.0 l/min |

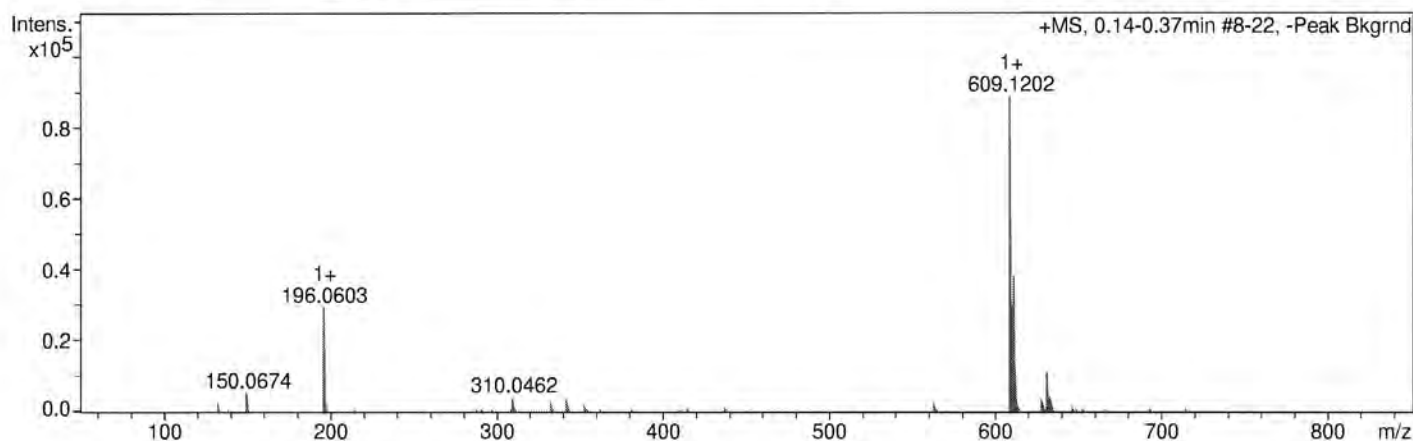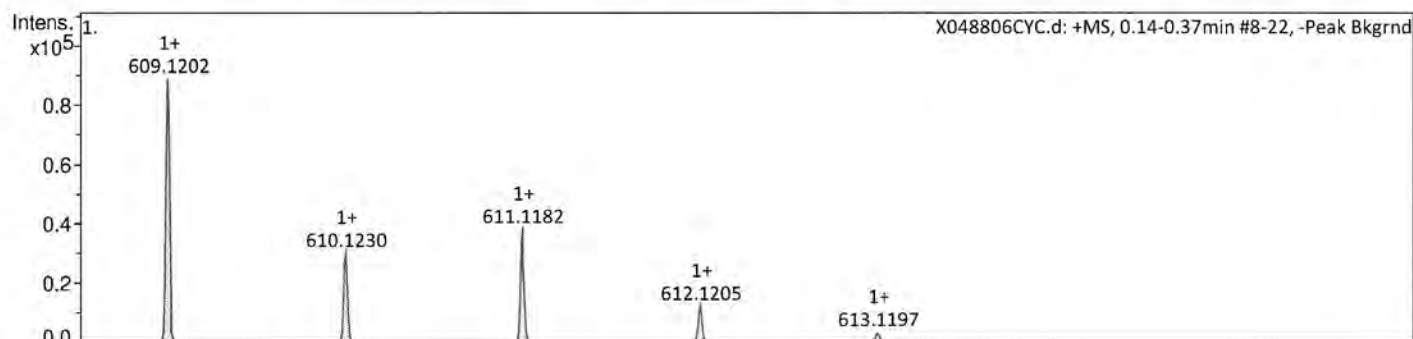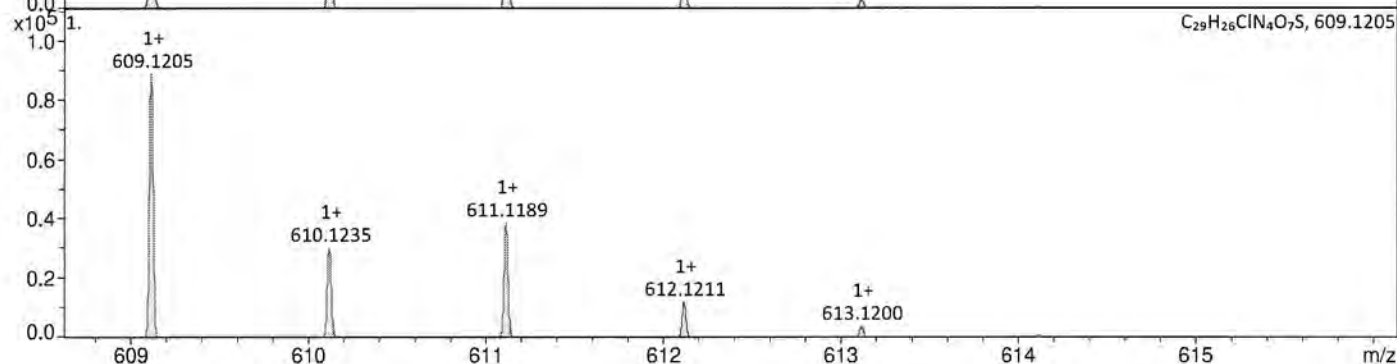

| Meas. m/z  | z  | # | Ion Formula     | m/z        | err [ppm] | mSigma | rdb  | e <sup>-</sup> | Conf |
|------------|----|---|-----------------|------------|-----------|--------|------|----------------|------|
| 150.067376 | 1+ | 1 | C9H10O2         | 150.067531 | 1.0       | 53.9   | 5.5  | odd            |      |
| 196.060261 | 1+ | 1 | C9H10NO4        | 196.060434 | 0.9       | 1.0    | 6.0  | even           |      |
| 333.042946 | 2+ | 1 | C29H27CaClN4O8S | 333.042653 | -0.9      | 31.1   | 19.0 | even           |      |
|            | 2+ | 2 | C28H31CaClO12S  | 333.041984 | -2.9      | 36.5   | 14.0 | even           |      |
| 342.048216 | 2+ | 1 | C29H29CaClN4O9S | 342.047936 | -0.8      | 22.4   | 18.0 | even           |      |
|            | 2+ | 2 | C28H33CaClO13S  | 342.047267 | -2.8      | 23.8   | 13.0 | even           |      |
| 609.120169 | 1+ | 1 | C29H26ClN4O7S   | 609.120524 | 0.6       | 2.8    | 19.0 | even           |      |
|            | 1+ | 2 | C28H30ClO11S    | 609.119187 | -1.6      | 10.6   | 14.0 | even           |      |

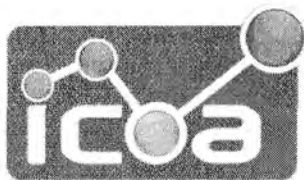

# Spectrométrie de Masse

## Demande d'analyse HRMS

### High-Resolution Mass Spectrometry analysis request form

|                                                                                                                               |                                                                                                                        |                                                                                        |
|-------------------------------------------------------------------------------------------------------------------------------|------------------------------------------------------------------------------------------------------------------------|----------------------------------------------------------------------------------------|
| Demandeur (Nom+Prénom) :<br><b>Sava Alexandru</b><br>(Submitter's name) : <b>AS</b>                                           | Tél :<br>(Phone)                                                                                                       | Mail :<br>(E-mail)                                                                     |
| Nom de l'échantillon : <b>AS 397</b><br>(Sample name) <b>8b</b>                                                               | Confirmation :<br><input checked="" type="checkbox"/> Structure connue<br>(Known structure)                            | Identification :<br><input type="checkbox"/> Structure inconnue<br>(Unknown structure) |
| Formule brute : <b>C<sub>29</sub>H<sub>24</sub>ClFN<sub>4</sub>O<sub>7</sub>S</b><br>(Molecular formula)                      | Structure :<br>(Chemical structure)                                                                                    |                                                                                        |
| Masse moléculaire : <b>627.04</b><br>(Molecular weight)                                                                       | 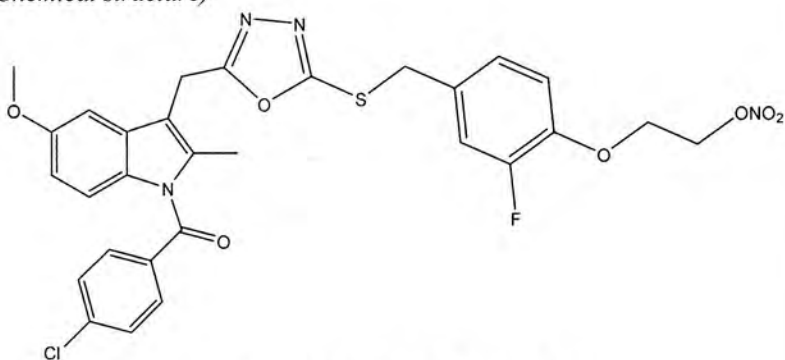                                    |                                                                                        |
| Solvant conseillé : <b>Acetone</b><br>(Recommended solvent)                                                                   | Chemical Formula: <b>C<sub>29</sub>H<sub>24</sub>ClFN<sub>4</sub>O<sub>7</sub>S</b><br>Molecular Weight: <b>627.04</b> |                                                                                        |
| Concentration ou masse :<br>(Concentration or weight)<br><b>1 mg / 1mL</b>                                                    |                                                                                                                        |                                                                                        |
| Remarques (conservation, solvants déconseillés, toxicité...) :<br>(Notes: storage, sample handling precautions, toxicity ...) |                                                                                                                        |                                                                                        |
| Responsable : <b>Sylvain Routier</b><br>(Supervisor)                                                                          | Date : <b>10.12.2019</b><br>(Date)                                                                                     | Bon pour accord :<br>(Signed as agreed)                                                |

### Partie réservée au service (For MS facility use only)

|                                                              |                                                   |                                    |
|--------------------------------------------------------------|---------------------------------------------------|------------------------------------|
| Position sur le rack :<br>(Position on the rack) <b>GE12</b> | Nom du fichier :<br>(File name) <b>X053979CYC</b> | Date :<br>(Date) <b>10/12/2019</b> |
| Remarques :<br>(Comments and suggestions)                    |                                                   |                                    |

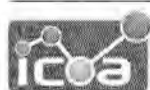

Analysis Info

Sample Name **AS397**  
Analysis Name X053979CYC.d

Acquisition Date 11/12/2019 20:04:33  
Instrument / Ser# maXis 255552.00086  
Method Positif.m

Acquisition Parameter

|             |          |                       |            |                |           |
|-------------|----------|-----------------------|------------|----------------|-----------|
| Source Type | ESI      | Ion Polarity          | Positive   | Set Nebulizer  | 0.6 Bar   |
| Scan Begin  | 50 m/z   | Set Capillary         | 4500 V     | Set Dry Heater | 200 °C    |
| Scan End    | 2500 m/z | Set Collision Cell RF | 1800.0 Vpp | Set Dry Gas    | 7.0 l/min |

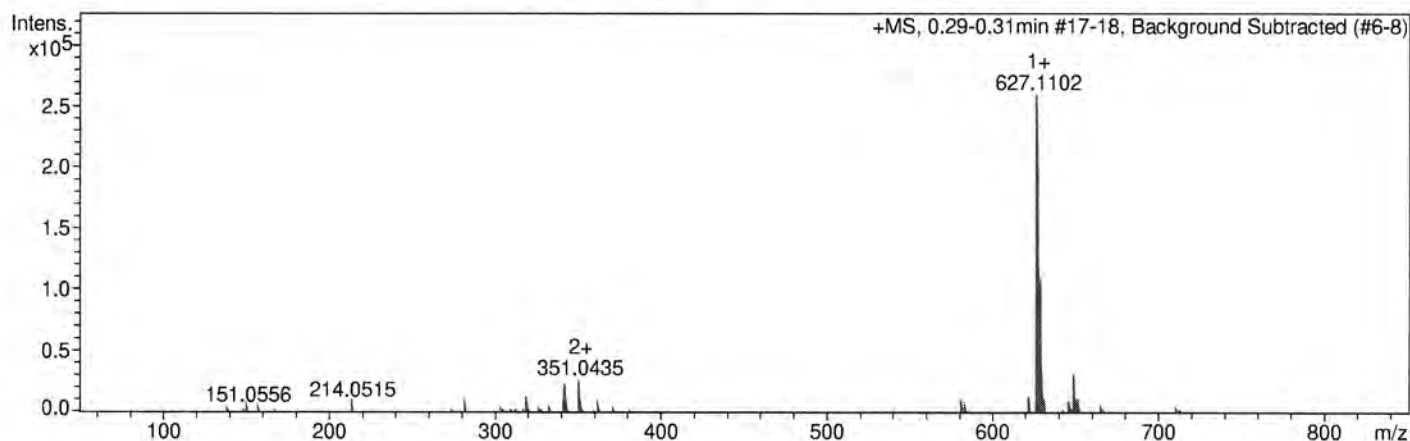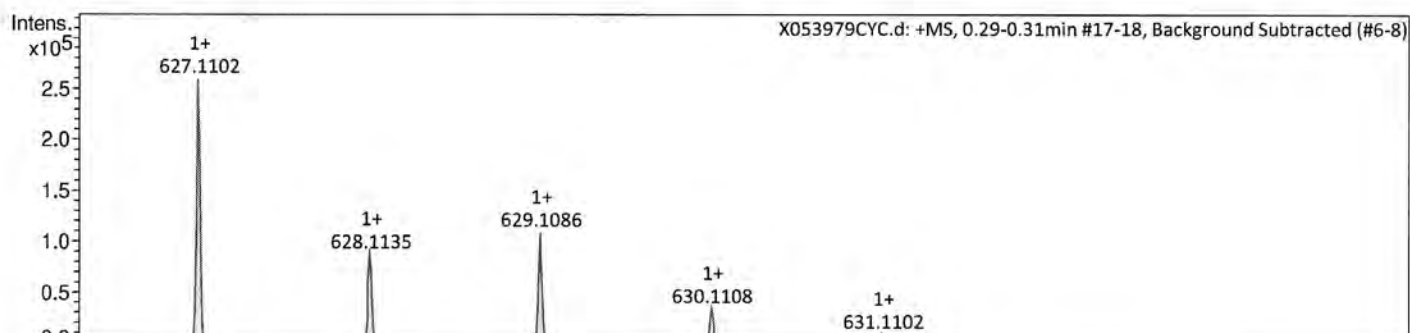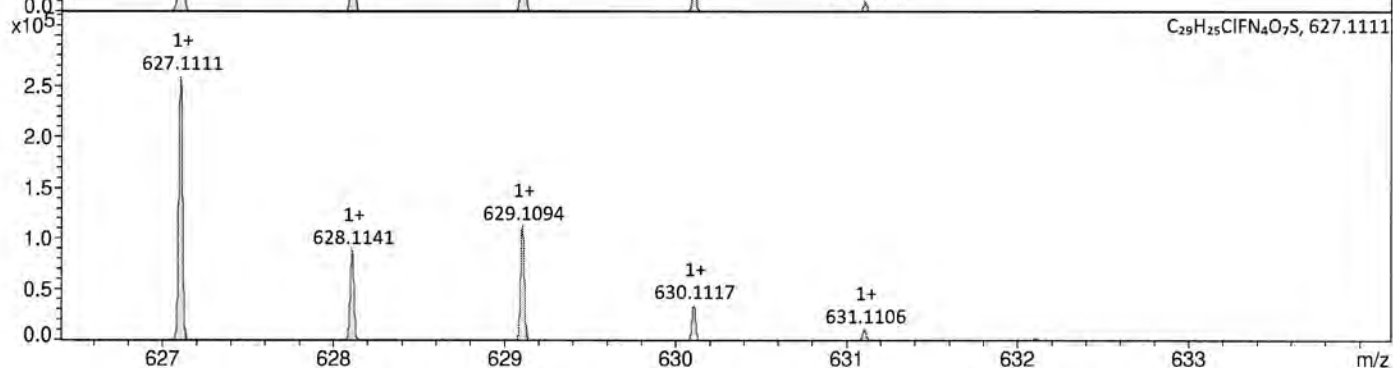

| Meas. m/z  | z  | # | Ion Formula       | m/z        | err [ppm] | mSigma | rdb  | e <sup>-</sup> Conf |
|------------|----|---|-------------------|------------|-----------|--------|------|---------------------|
| 342.038352 | 2+ | 1 | C29H26CaClFN4O8S  | 342.037942 | -1.2      | 6.7    | 19.0 | even                |
|            | 2+ | 2 | C17H30CaClFN6O15S | 342.038868 | 1.5       | 47.0   | 6.0  | even                |
| 351.043510 | 2+ | 1 | C29H28CaClFN4O9S  | 351.043225 | -0.8      | 20.6   | 18.0 | even                |
| 581.117555 | 1+ | 1 | C29H25ClFN3O5S    | 581.118199 | 1.1       | 12.3   | 18.5 | odd                 |
| 627.110186 | 1+ | 1 | C29H25ClFN4O7S    | 627.111102 | 1.5       | 7.6    | 19.0 | even                |
|            | 1+ | 2 | C28H29ClFO11S     | 627.109765 | -0.7      | 11.1   | 14.0 | even                |
| 649.092195 | 1+ | 1 | C29H24ClFN4NaO7S  | 649.093047 | 1.3       | 21.3   | 19.0 | even                |
|            | 1+ | 2 | C28H28ClFN4NaO11S | 649.091709 | -0.7      | 25.3   | 14.0 | even                |

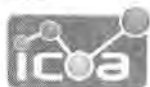

| Meas. m/z  | z  | # | Ion Formula     | m/z        | err [ppm] | mSigma | rdb  | e <sup>-</sup> | Conf |
|------------|----|---|-----------------|------------|-----------|--------|------|----------------|------|
| 631.101895 | 1+ | 1 | C29H25CIN4NaO7S | 631.102469 | 0.9       | 21.7   | 19.0 | even           |      |
|            | 1+ | 2 | C28H29CINaO11S  | 631.101131 | -1.2      | 21.9   | 14.0 | even           |      |

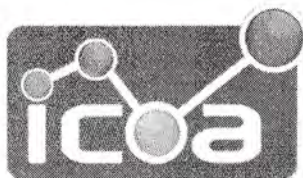

# Spectrométrie de Masse

## Demande d'analyse HRMS

### High-Resolution Mass Spectrometry analysis request form

|                                                                                                                     |                                                                                                                                   |                                                                                        |
|---------------------------------------------------------------------------------------------------------------------|-----------------------------------------------------------------------------------------------------------------------------------|----------------------------------------------------------------------------------------|
| Demandeur (Nom+Prénom) :<br><b>Sava Alexandru</b><br>(Submitter's name) : <b>AS</b>                                 | Tél :<br>(Phone)                                                                                                                  | Mail :<br>(E-mail)                                                                     |
| Nom de l'échantillon : <b>AS 391</b><br>(Sample name) <b>8c</b>                                                     | Confirmation :<br><input checked="" type="checkbox"/> Structure connue<br>(Known structure)                                       | Identification :<br><input type="checkbox"/> Structure inconnue<br>(Unknown structure) |
| Formule brute : <b>C<sub>29</sub>H<sub>24</sub>Cl<sub>2</sub>N<sub>4</sub>O<sub>7</sub>S</b><br>(Molecular formula) | Structure :<br>(Chemical structure)                                                                                               |                                                                                        |
| Masse moléculaire : <b>643.49</b><br>(Molecular weight)                                                             | 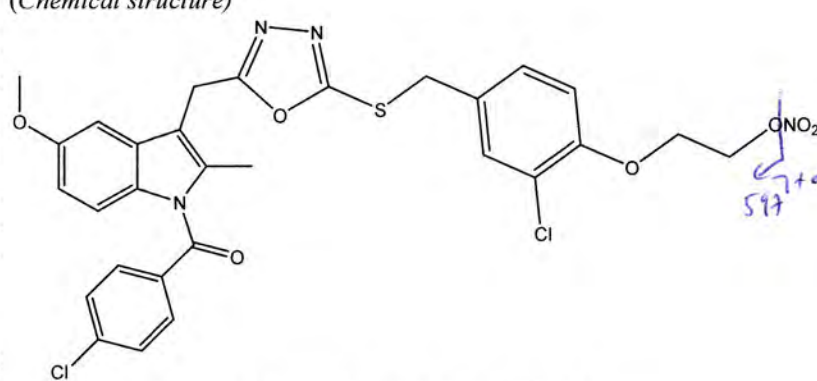                                               |                                                                                        |
| Solvant conseillé : <b>Acetone</b><br>(Recommended solvent)                                                         | Chemical Formula: <b>C<sub>29</sub>H<sub>24</sub>Cl<sub>2</sub>N<sub>4</sub>O<sub>7</sub>S</b><br>Molecular Weight: <b>643.49</b> |                                                                                        |
| Concentration ou masse :<br>(Concentration or weight)<br><b>1 mg / 1mL</b>                                          | Remarques (conservation, solvants déconseillés, toxicité...) :<br>(Notes: storage, sample handling precautions, toxicity ...)     |                                                                                        |
| Responsable : <b>Sylvain Routier</b><br>(Supervisor)                                                                | Date : <b>10.12.2019</b><br>(Date)                                                                                                | Bon pour accord :<br>(Signed as agreed)                                                |

### Partie réservée au service (For MS facility use only)

|                                                              |                                                   |                                    |
|--------------------------------------------------------------|---------------------------------------------------|------------------------------------|
| Position sur le rack :<br>(Position on the rack) <b>GC11</b> | Nom du fichier :<br>(File name) <b>X053954CYC</b> | Date :<br>(Date) <b>10/12/2019</b> |
| Remarques :<br>(Comments and suggestions)                    |                                                   |                                    |

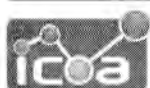

Analysis Info

Sample Name **AS391**  
Analysis Name X053954CYC.d

Acquisition Date 11/12/2019 18:03:15  
Instrument / Ser# maXis 255552.00086  
Method Positif.m

Acquisition Parameter

|             |          |                       |            |                |           |
|-------------|----------|-----------------------|------------|----------------|-----------|
| Source Type | ESI      | Ion Polarity          | Positive   | Set Nebulizer  | 0.6 Bar   |
| Scan Begin  | 50 m/z   | Set Capillary         | 4500 V     | Set Dry Heater | 200 °C    |
| Scan End    | 2500 m/z | Set Collision Cell RF | 1800.0 Vpp | Set Dry Gas    | 7.0 l/min |

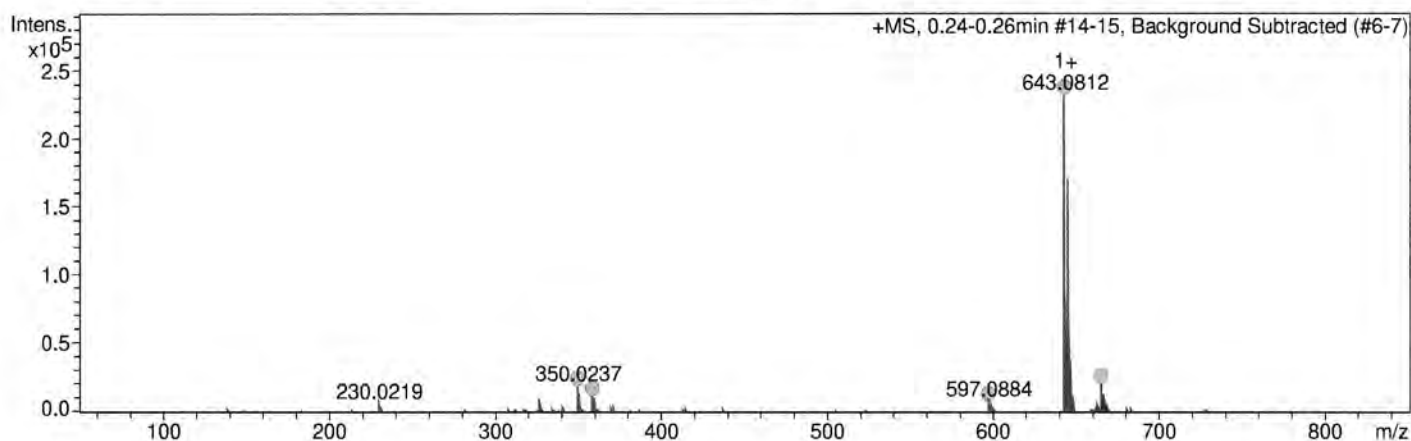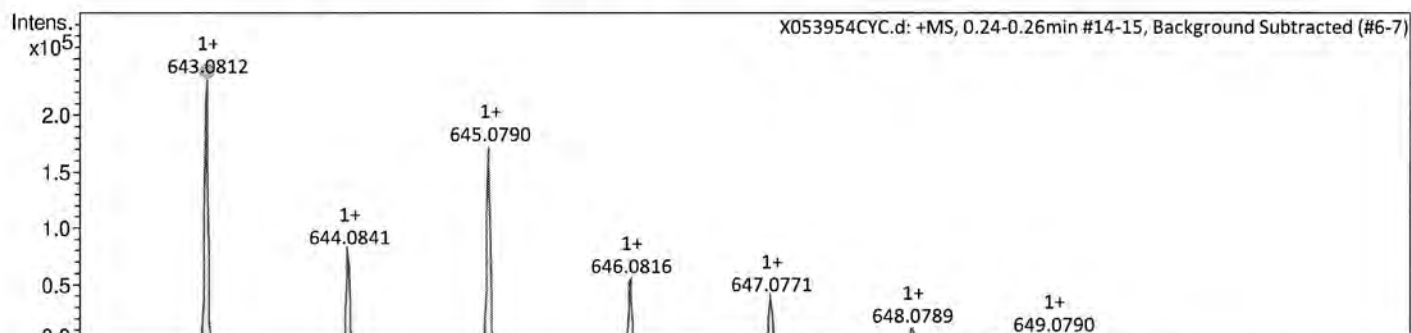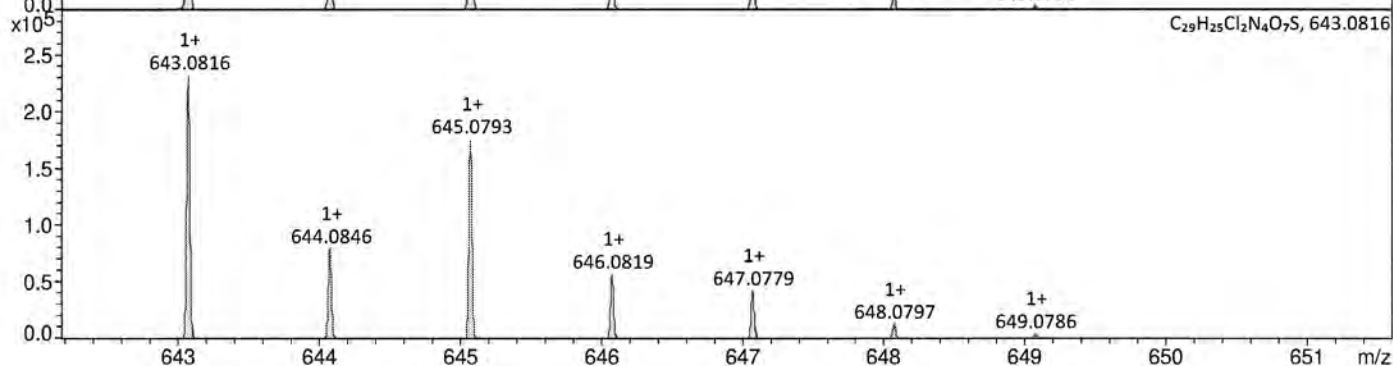

| Meas. m/z  | z  | # | Ion Formula      | m/z        | err [ppm] | mSigma | rdb  | e <sup>-</sup> | Conf |
|------------|----|---|------------------|------------|-----------|--------|------|----------------|------|
| 350.023664 | 2+ | 1 | C29H26CaCl2N4O8S | 350.023167 | -1.4      | 7.6    | 19.0 | even           |      |
| 359.029029 | 2+ | 1 | C29H28CaCl2N4O9S | 359.028449 | -1.6      | 48.9   | 18.0 | even           |      |
| 597.088398 | 1+ | 1 | C29H25Cl2N3O5S   | 597.088649 | 0.4       | 50.8   | 18.5 | odd            |      |
| 643.081171 | 1+ | 1 | C29H25Cl2N4O7S   | 643.081552 | 0.6       | 8.3    | 19.0 | even           |      |
|            | 1+ | 2 | C28H29Cl2O11S    | 643.080215 | -1.5      | 14.1   | 14.0 | even           |      |
| 665.062716 | 1+ | 1 | C28H28Cl2NaO11S  | 665.062159 | -0.8      | 33.1   | 14.0 | even           |      |
|            | 1+ | 2 | C29H24Cl2N4NaO7S | 665.063496 | 1.2       | 33.8   | 19.0 | even           |      |

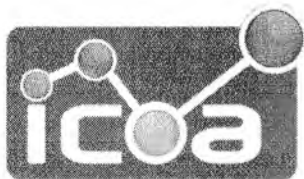

# Spectrométrie de Masse

## Demande d'analyse HRMS

### High-Resolution Mass Spectrometry analysis request form

|                                                                                                         |                                                                                                                               |                                                                                        |
|---------------------------------------------------------------------------------------------------------|-------------------------------------------------------------------------------------------------------------------------------|----------------------------------------------------------------------------------------|
| Demandeur (Nom+Prénom) :<br><b>Sava Alexandru</b><br>(Submitter's name) : <b>AS</b>                     | Tél :<br>(Phone)                                                                                                              | Mail :<br>(E-mail)                                                                     |
| Nom de l'échantillon : <b>AS 390</b><br>(Sample name) <b>8e</b>                                         | Confirmation :<br><input checked="" type="checkbox"/> Structure connue<br>(Known structure)                                   | Identification :<br><input type="checkbox"/> Structure inconnue<br>(Unknown structure) |
| Formule brute : <b>C<sub>29</sub>H<sub>24</sub>ClN<sub>5</sub>O<sub>9</sub>S</b><br>(Molecular formula) | Structure :<br>(Chemical structure)                                                                                           |                                                                                        |
| Masse moléculaire : <b>654.05</b><br>(Molecular weight)                                                 |                                                                                                                               |                                                                                        |
| Solvant conseillé : <b>Acetone</b><br>(Recommended solvent)                                             | Chemical Formula: <b>C<sub>29</sub>H<sub>24</sub>ClN<sub>5</sub>O<sub>9</sub>S</b><br>Molecular Weight: <b>654.05</b>         |                                                                                        |
| Concentration ou masse :<br>(Concentration or weight)<br><b>1 mg / 1mL</b>                              | Remarques (conservation, solvants déconseillés, toxicité...) :<br>(Notes: storage, sample handling precautions, toxicity ...) |                                                                                        |
| Responsable : <b>Sylvain Routier</b><br>(Supervisor)                                                    | Date : <b>10.12.2019</b><br>(Date)                                                                                            | Bon pour accord :<br>(Signed as agreed)                                                |

### Partie réservée au service (For MS facility use only)

|                                                                                                                                                   |                                                   |                                    |
|---------------------------------------------------------------------------------------------------------------------------------------------------|---------------------------------------------------|------------------------------------|
| Position sur le rack :<br>(Position on the rack) <b>GC10</b>                                                                                      | Nom du fichier :<br>(File name) <b>X053953CYC</b> | Date :<br>(Date) <b>10/12/2019</b> |
| Remarques :<br>(Comments and suggestions) <i>m/z 346<sup>2+</sup>, 355<sup>2+</sup> = [A+Ca]<sup>2+</sup>, [A+Ca+H<sub>2</sub>O]<sup>2+</sup></i> |                                                   |                                    |

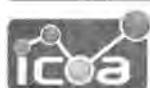

Analysis Info

Sample Name **AS390**  
Analysis Name X053953CYC.d

Acquisition Date 11/12/2019 18:01:40  
Instrument / Ser# maXis 255552.00086  
Method Positif.m

Acquisition Parameter

|             |          |                       |            |                |           |
|-------------|----------|-----------------------|------------|----------------|-----------|
| Source Type | ESI      | Ion Polarity          | Positive   | Set Nebulizer  | 0.6 Bar   |
| Scan Begin  | 50 m/z   | Set Capillary         | 4500 V     | Set Dry Heater | 200 °C    |
| Scan End    | 2500 m/z | Set Collision Cell RF | 1800.0 Vpp | Set Dry Gas    | 7.0 l/min |

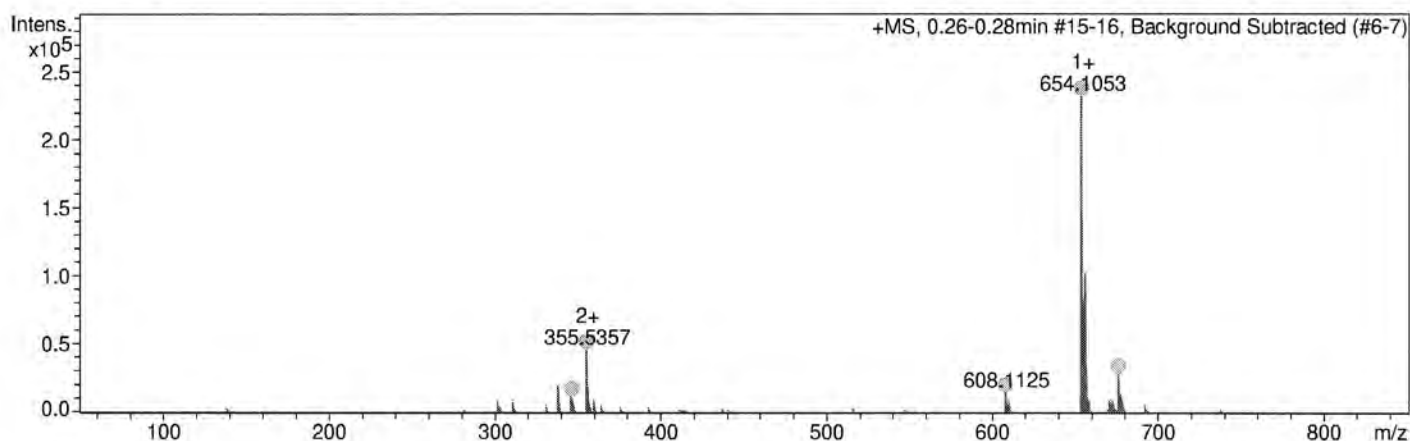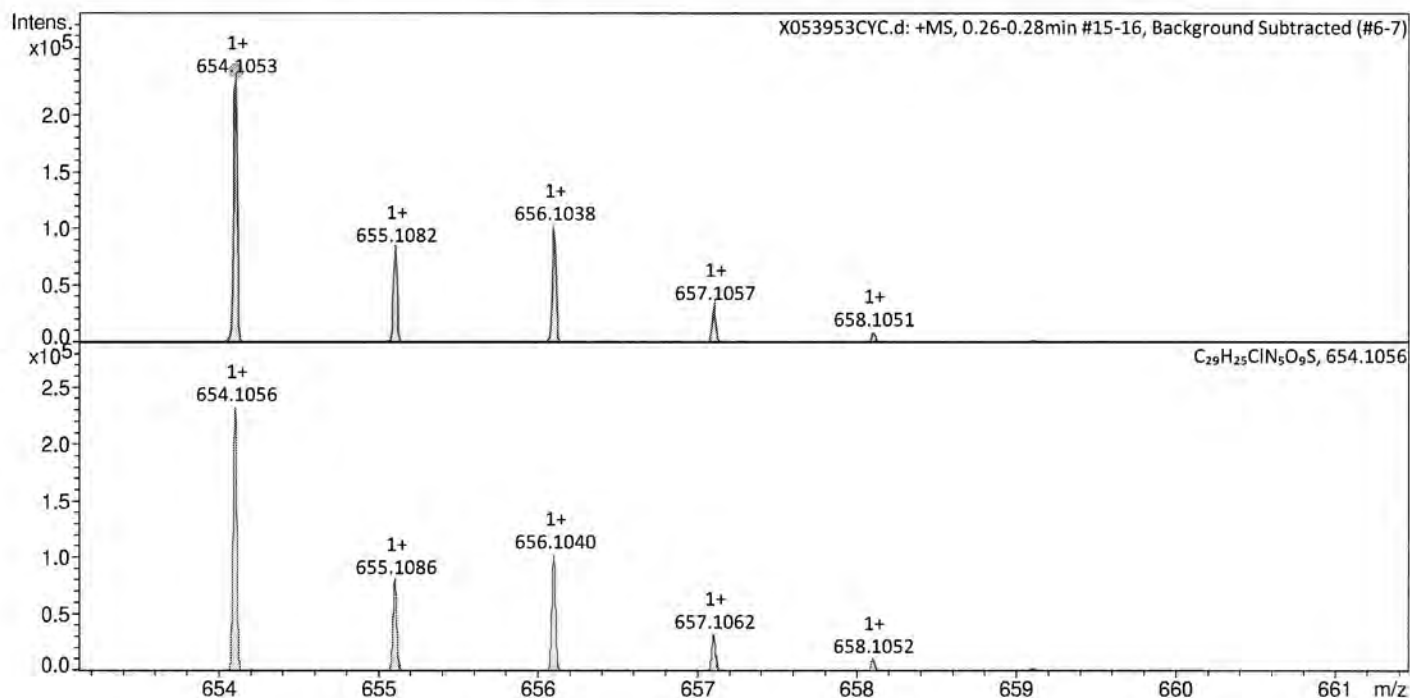

| Meas. m/z  | z  | # | Ion Formula                                                          | m/z        | err [ppm] | mSigma | rdb  | e <sup>-</sup> | Conf |
|------------|----|---|----------------------------------------------------------------------|------------|-----------|--------|------|----------------|------|
| 346.530830 | 2+ | 1 | C <sub>29</sub> H <sub>24</sub> CaCIN <sub>5</sub> O <sub>9</sub> S  | 346.529910 | -2.7      | 31.7   | 21.0 | even           |      |
| 355.535663 | 2+ | 1 | C <sub>29</sub> H <sub>26</sub> CaCIN <sub>5</sub> O <sub>10</sub> S | 355.535192 | -1.3      | 13.8   | 20.0 | even           |      |
| 608.112510 | 1+ | 1 | C <sub>29</sub> H <sub>25</sub> CIN <sub>4</sub> O <sub>7</sub> S    | 608.112699 | 0.3       | 13.9   | 19.5 | odd            |      |
|            | 1+ | 2 | C <sub>28</sub> H <sub>29</sub> ClO <sub>11</sub> S                  | 608.111362 | -1.9      | 21.2   | 14.5 | odd            |      |
| 654.105294 | 1+ | 1 | C <sub>29</sub> H <sub>25</sub> CIN <sub>5</sub> O <sub>9</sub> S    | 654.105603 | 0.5       | 4.9    | 20.0 | even           |      |
|            | 1+ | 2 | C <sub>28</sub> H <sub>29</sub> CINO <sub>13</sub> S                 | 654.104265 | -1.6      | 14.3   | 15.0 | even           |      |
| 676.087160 | 1+ | 1 | C <sub>29</sub> H <sub>24</sub> CIN <sub>5</sub> NaO <sub>9</sub> S  | 676.087547 | 0.6       | 13.8   | 20.0 | even           |      |
|            | 1+ | 2 | C <sub>28</sub> H <sub>28</sub> CINNaO <sub>13</sub> S               | 676.086209 | -1.4      | 18.1   | 15.0 | even           |      |

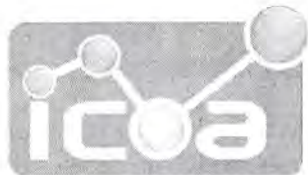

# Spectrométrie de Masse

## Demande d'analyse HRMS

### High-Resolution Mass Spectrometry analysis request form

|                                                                                                         |                                                                                                                               |                                                                                        |
|---------------------------------------------------------------------------------------------------------|-------------------------------------------------------------------------------------------------------------------------------|----------------------------------------------------------------------------------------|
| Demandeur (Nom+Prénom) :<br><b>Sava Alexandru</b><br>(Submitter's name) : <b>AS</b>                     | Tél :<br>(Phone)                                                                                                              | Mail :<br>(E-mail)                                                                     |
| Nom de l'échantillon : <b>AS 331</b><br>(Sample name) <b>8f</b>                                         | Confirmation :<br><input checked="" type="checkbox"/> Structure connue<br>(Known structure)                                   | Identification :<br><input type="checkbox"/> Structure inconnue<br>(Unknown structure) |
| Formule brute : <b>C<sub>30</sub>H<sub>27</sub>ClN<sub>4</sub>O<sub>8</sub>S</b><br>(Molecular formula) | Structure :<br>(Chemical structure)                                                                                           |                                                                                        |
| Masse moléculaire : <b>639,08</b><br>(Molecular weight)                                                 |                                                                                                                               |                                                                                        |
| Solvant conseillé : <b>Acetone</b><br>(Recommended solvent)                                             | Chemical Formula: <b>C<sub>30</sub>H<sub>27</sub>ClN<sub>4</sub>O<sub>8</sub>S</b><br>Molecular Weight: <b>639.08</b>         |                                                                                        |
| Concentration ou masse :<br>(Concentration or weight)<br><b>1 mg / 1mL</b>                              | Remarques (conservation, solvants déconseillés, toxicité...) :<br>(Notes: storage, sample handling precautions, toxicity ...) |                                                                                        |
| Responsable : <b>Sylvain Routier</b><br>(Supervisor)                                                    | Date : <b>06.03.2018</b><br>(Date)                                                                                            | Bon pour accord :<br>(Signed as agreed)                                                |

### Partie réservée au service (For MS facility use only)

|                                                              |                                                   |                                    |
|--------------------------------------------------------------|---------------------------------------------------|------------------------------------|
| Position sur le rack :<br>(Position on the rack) <b>GE11</b> | Nom du fichier :<br>(File name) <b>X048807CYC</b> | Date :<br>(Date) <b>13/03/2019</b> |
| Remarques :<br>(Comments and suggestions)                    |                                                   |                                    |

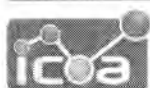

Analysis Info

Sample Name **AS331**  
Analysis Name X048807CYC.d

Acquisition Date 13/03/2019 19:48:23  
Instrument / Ser# maXis 255552.00086  
Method positif-6.m

Acquisition Parameter

|             |          |                       |            |                |           |
|-------------|----------|-----------------------|------------|----------------|-----------|
| Source Type | ESI      | Ion Polarity          | Positive   | Set Nebulizer  | 0.6 Bar   |
| Scan Begin  | 50 m/z   | Set Capillary         | 4500 V     | Set Dry Heater | 200 °C    |
| Scan End    | 2500 m/z | Set Collision Cell RF | 1800.0 Vpp | Set Dry Gas    | 7.0 l/min |

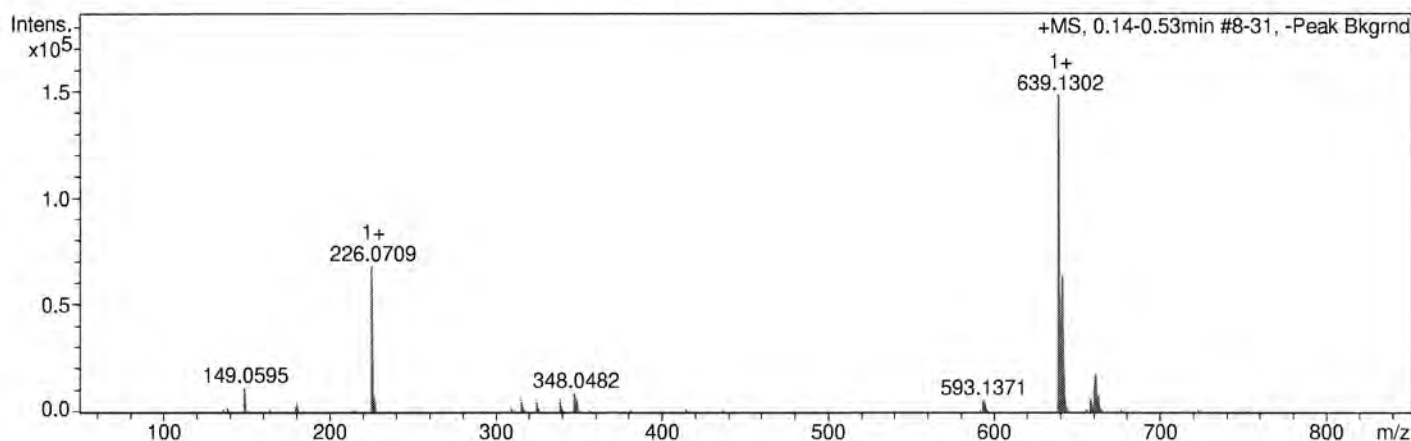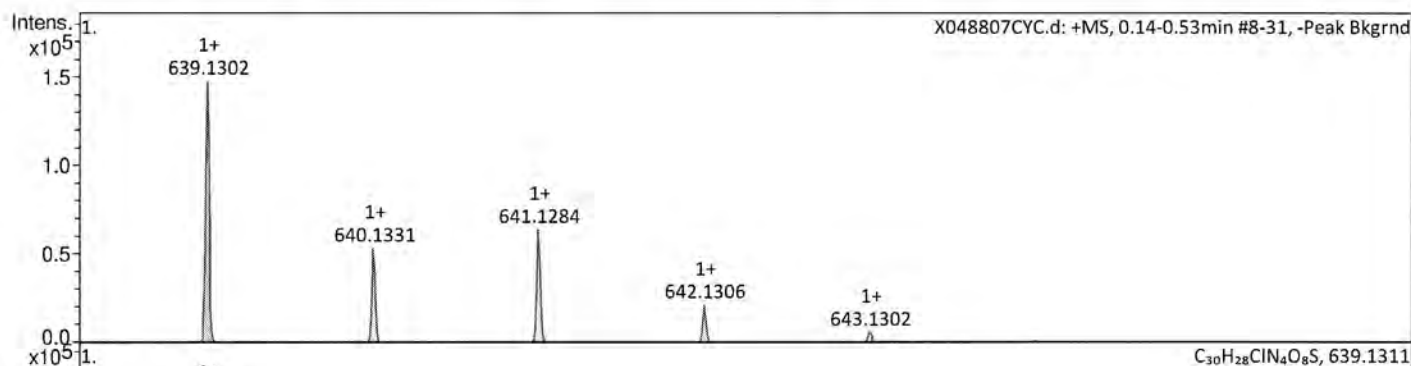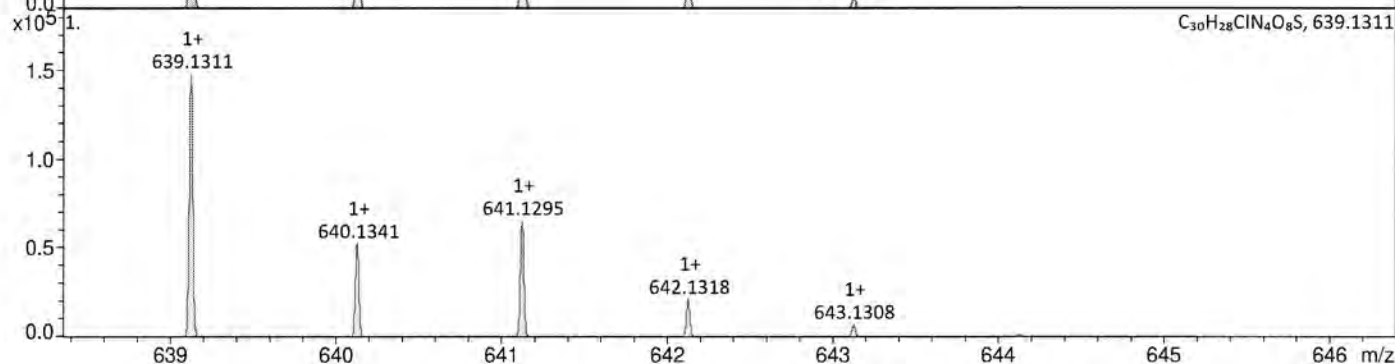

| Meas. m/z  | z  | # | Ion Formula     | m/z        | err [ppm] | mSigma | rdb  | e <sup>-</sup> | Conf |
|------------|----|---|-----------------|------------|-----------|--------|------|----------------|------|
| 149.059480 | 1+ | 1 | C9H9O2          | 149.059706 | 1.5       | 5.3    | 6.0  | even           |      |
| 226.070885 | 1+ | 1 | C10H12NO5       | 226.070999 | 0.5       | 4.6    | 6.0  | even           |      |
| 339.042764 | 2+ | 1 | C30H27CaCIN4O8S | 339.042653 | -0.3      | 17.1   | 20.0 | even           |      |
| 348.048173 | 2+ | 1 | C30H29CaCIN4O9S | 348.047936 | -0.7      | 16.9   | 19.0 | even           |      |
| 593.137109 | 1+ | 1 | C30H28CIN3O6S   | 593.138186 | 1.8       | 23.5   | 18.5 | odd            |      |
| 639.130233 | 1+ | 1 | C30H28CIN4O8S   | 639.131089 | 1.3       | 6.0    | 19.0 | even           |      |
|            | 1+ | 2 | C29H32CIO12S    | 639.129752 | -0.8      | 15.1   | 14.0 | even           |      |
| 661.111962 | 1+ | 1 | C30H27CIN4NaO8S | 661.113033 | 1.6       | 5.8    | 19.0 | even           |      |

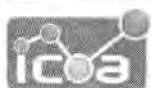

| Meas. m/z | z  | # | Ion Formula                                           | m/z        | err [ppm] | mSigma | rdb  | e <sup>-</sup> Conf |
|-----------|----|---|-------------------------------------------------------|------------|-----------|--------|------|---------------------|
|           | 1+ | 2 | C <sub>29</sub> H <sub>31</sub> ClNaO <sub>12</sub> S | 661.111696 | -0.4      | 8.5    | 14.0 | even                |

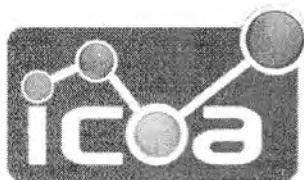

# Spectrométrie de Masse

## Demande d'analyse HRMS

### High-Resolution Mass Spectrometry analysis request form

|                                                                                                                               |                                                                                                                 |                                                                                        |
|-------------------------------------------------------------------------------------------------------------------------------|-----------------------------------------------------------------------------------------------------------------|----------------------------------------------------------------------------------------|
| Demandeur (Nom+Prénom) :<br><b>Sava Alexandru</b><br>(Submitter's name) : <b>AS</b>                                           | Tél :<br>(Phone)                                                                                                | Mail :<br>(E-mail)                                                                     |
| Nom de l'échantillon : <b>AS 392</b><br>(Sample name) <b>8k</b>                                                               | Confirmation :<br><input checked="" type="checkbox"/> Structure connue<br>(Known structure)                     | Identification :<br><input type="checkbox"/> Structure inconnue<br>(Unknown structure) |
| Formule brute : <b>C<sub>29</sub>H<sub>24</sub>ClN<sub>5</sub>O<sub>9</sub>S</b><br>(Molecular formula)                       | Structure :<br>(Chemical structure)                                                                             |                                                                                        |
| Masse moléculaire : <b>654.05</b><br>(Molecular weight)                                                                       | <p>Chemical Formula: C<sub>29</sub>H<sub>24</sub>ClN<sub>5</sub>O<sub>9</sub>S<br/>Molecular Weight: 654.05</p> |                                                                                        |
| Solvant conseillé : <b>Acetone</b><br>(Recommended solvent)                                                                   |                                                                                                                 |                                                                                        |
| Concentration ou masse :<br>(Concentration or weight)<br><b>1 mg / 1mL</b>                                                    |                                                                                                                 |                                                                                        |
| Remarques (conservation, solvants déconseillés, toxicité...) :<br>(Notes: storage, sample handling precautions, toxicity ...) |                                                                                                                 |                                                                                        |
| Responsable : <b>Sylvain Routier</b><br>(Supervisor)                                                                          | Date : <b>10.12.2019</b><br>(Date)                                                                              | Bon pour accord :<br>(Signed as agreed)                                                |

### Partie réservée au service (For MS facility use only)

|                                                              |                                                   |                                    |
|--------------------------------------------------------------|---------------------------------------------------|------------------------------------|
| Position sur le rack :<br>(Position on the rack) <b>GC12</b> | Nom du fichier :<br>(File name) <b>X053955CYC</b> | Date :<br>(Date) <b>10/12/2019</b> |
| Remarques :<br>(Comments and suggestions)                    |                                                   |                                    |

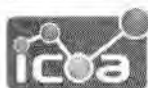

Analysis Info

Sample Name **AS392**  
Analysis Name X053955CYC.d

Acquisition Date 11/12/2019 18:04:51  
Instrument / Ser# maXis 255552.00086  
Method Positif.m

Acquisition Parameter

|             |          |                       |            |                |           |
|-------------|----------|-----------------------|------------|----------------|-----------|
| Source Type | ESI      | Ion Polarity          | Positive   | Set Nebulizer  | 0.6 Bar   |
| Scan Begin  | 50 m/z   | Set Capillary         | 4500 V     | Set Dry Heater | 200 °C    |
| Scan End    | 2500 m/z | Set Collision Cell RF | 1800.0 Vpp | Set Dry Gas    | 7.0 l/min |

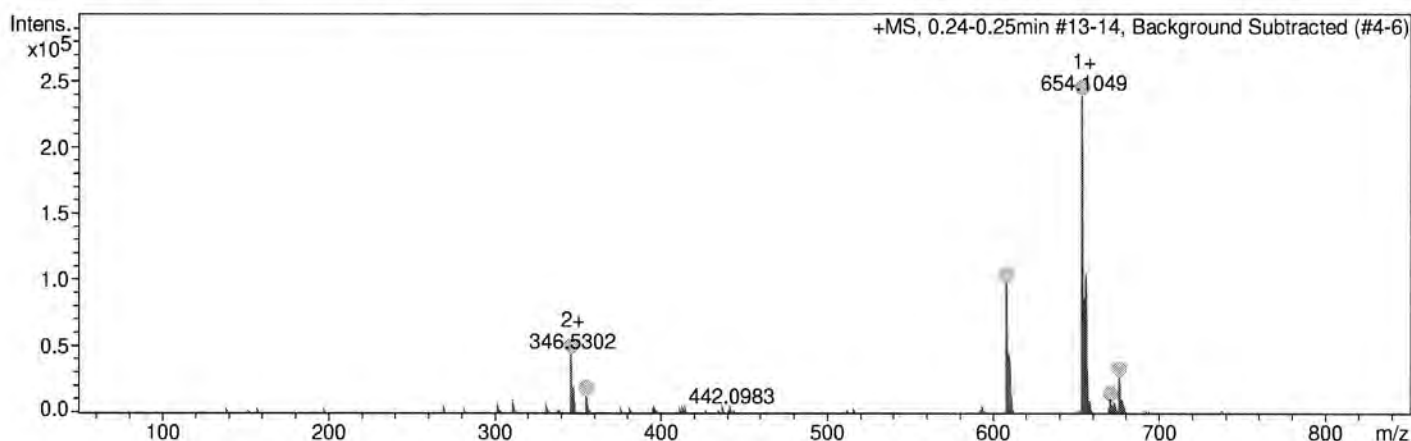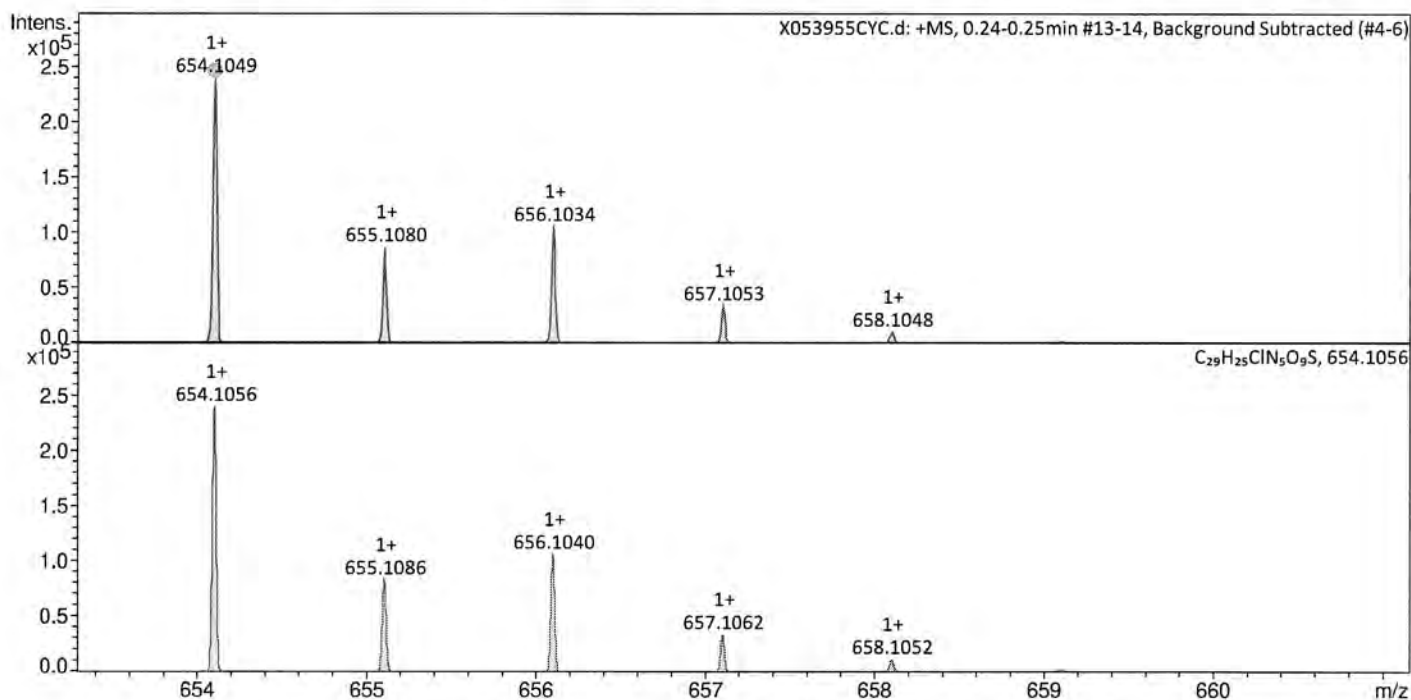

| Meas. m/z  | z  | # | Ion Formula      | m/z        | err [ppm] | mSigma | rdb  | e <sup>-</sup> | Conf |
|------------|----|---|------------------|------------|-----------|--------|------|----------------|------|
| 346.530226 | 2+ | 1 | C29H24CaClN5O9S  | 346.529910 | -0.9      | 10.3   | 21.0 | even           |      |
| 355.535162 | 2+ | 1 | C29H26CaClN5O10S | 355.535192 | 0.1       | 13.9   | 20.0 | even           |      |
|            | 2+ | 2 | C28H30CaClNO14S  | 355.534524 | -1.8      | 18.6   | 15.0 | even           |      |
| 608.112509 | 1+ | 1 | C29H25ClN4O7S    | 608.112699 | 0.3       | 6.2    | 19.5 | odd            |      |
|            | 1+ | 2 | C28H29ClO11S     | 608.111362 | -1.9      | 16.1   | 14.5 | odd            |      |
| 654.104904 | 1+ | 1 | C29H25ClN5O9S    | 654.105603 | 1.1       | 6.9    | 20.0 | even           |      |
|            | 1+ | 2 | C28H29ClNO13S    | 654.104265 | -1.0      | 16.7   | 15.0 | even           |      |
| 671.131445 | 1+ | 1 | C29H28ClN6O9S    | 671.132152 | 1.1       | 34.8   | 19.0 | even           |      |

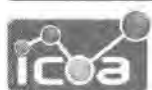

| Meas. m/z  | z  | # | Ion Formula     | m/z        | err [ppm] | mSigma | rdb  | e <sup>-</sup> | Conf |
|------------|----|---|-----------------|------------|-----------|--------|------|----------------|------|
| 676.086834 | 1+ | 2 | C28H32CIN2O13S  | 671.130814 | -0.9      | 35.4   | 14.0 | even           |      |
|            | 1+ | 1 | C29H24CIN5NaO9S | 676.087547 | 1.1       | 9.9    | 20.0 | even           |      |
|            | 1+ | 2 | C28H28CINNaO13S | 676.086209 | -0.9      | 14.4   | 15.0 | even           |      |

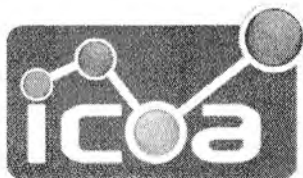

# Spectrométrie de Masse

## Demande d'analyse HRMS

### High-Resolution Mass Spectrometry analysis request form

|                                                                                                                     |                                                                                                                                   |                                                                                        |
|---------------------------------------------------------------------------------------------------------------------|-----------------------------------------------------------------------------------------------------------------------------------|----------------------------------------------------------------------------------------|
| Demandeur (Nom+Prénom) :<br><b>Sava Alexandru</b><br>(Submitter's name) : <b>AS</b>                                 | Tél :<br>(Phone)                                                                                                                  | Mail :<br>(E-mail)                                                                     |
| Nom de l'échantillon : <b>AS 394</b><br>(Sample name)<br><b>8l</b>                                                  | Confirmation :<br><input checked="" type="checkbox"/> Structure connue<br>(Known structure)                                       | Identification :<br><input type="checkbox"/> Structure inconnue<br>(Unknown structure) |
| Formule brute : <b>C<sub>30</sub>H<sub>26</sub>Cl<sub>2</sub>N<sub>4</sub>O<sub>8</sub>S</b><br>(Molecular formula) | Structure :<br>(Chemical structure)                                                                                               |                                                                                        |
| Masse moléculaire : <b>673.52</b><br>(Molecular weight)                                                             |                                                                                                                                   |                                                                                        |
| Solvant conseillé : <b>Acetone</b><br>(Recommended solvent)                                                         | Chemical Formula: <b>C<sub>30</sub>H<sub>26</sub>Cl<sub>2</sub>N<sub>4</sub>O<sub>8</sub>S</b><br>Molecular Weight: <b>673.52</b> |                                                                                        |
| Concentration ou masse :<br>(Concentration or weight)<br><b>1 mg / 1mL</b>                                          | Remarques (conservation, solvants déconseillés, toxicité...) :<br>(Notes: storage, sample handling precautions, toxicity ...)     |                                                                                        |
| Responsable : <b>Sylvain Routier</b><br>(Supervisor)                                                                | Date : <b>10.12.2019</b><br>(Date)                                                                                                | Bon pour accord :<br>(Signed as agreed)                                                |

### Partie réservée au service (For MS facility use only)

|                                                             |                                                   |                                    |
|-------------------------------------------------------------|---------------------------------------------------|------------------------------------|
| Position sur le rack :<br>(Position on the rack) <b>GD2</b> | Nom du fichier :<br>(File name) <b>X053957CYC</b> | Date :<br>(Date) <b>10/12/2019</b> |
| Remarques :<br>(Comments and suggestions)                   |                                                   |                                    |

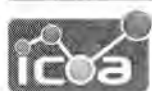

Analysis Info

Sample Name **AS394**  
Analysis Name X053957CYC.d

Acquisition Date 11/12/2019 18:07:51  
Instrument / Ser# maXis 255552.00086  
Method Positif.m

Acquisition Parameter

|             |          |                       |            |                |           |
|-------------|----------|-----------------------|------------|----------------|-----------|
| Source Type | ESI      | Ion Polarity          | Positive   | Set Nebulizer  | 0.6 Bar   |
| Scan Begin  | 50 m/z   | Set Capillary         | 4500 V     | Set Dry Heater | 200 °C    |
| Scan End    | 2500 m/z | Set Collision Cell RF | 1800.0 Vpp | Set Dry Gas    | 7.0 l/min |

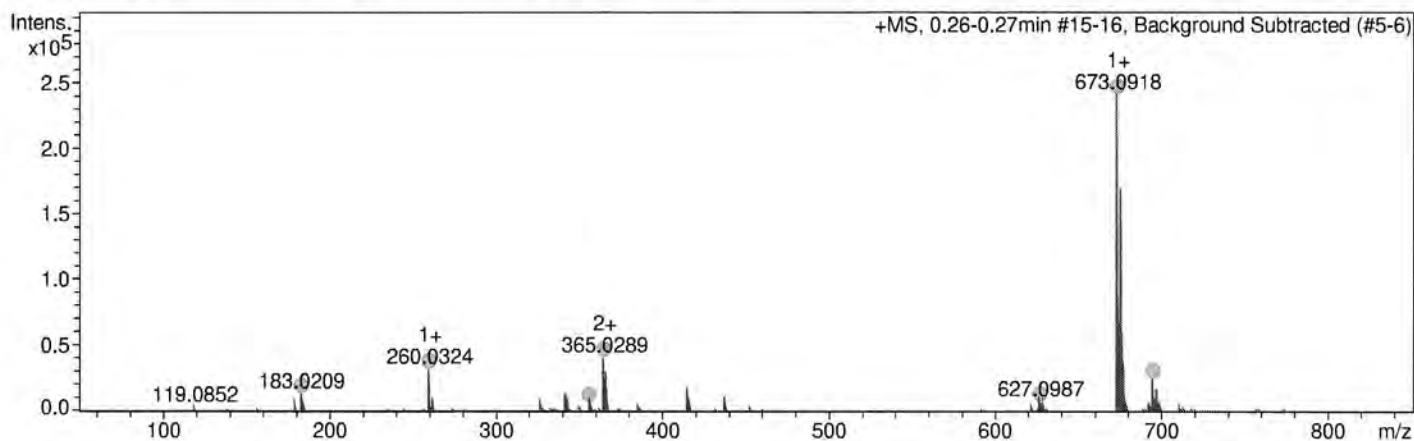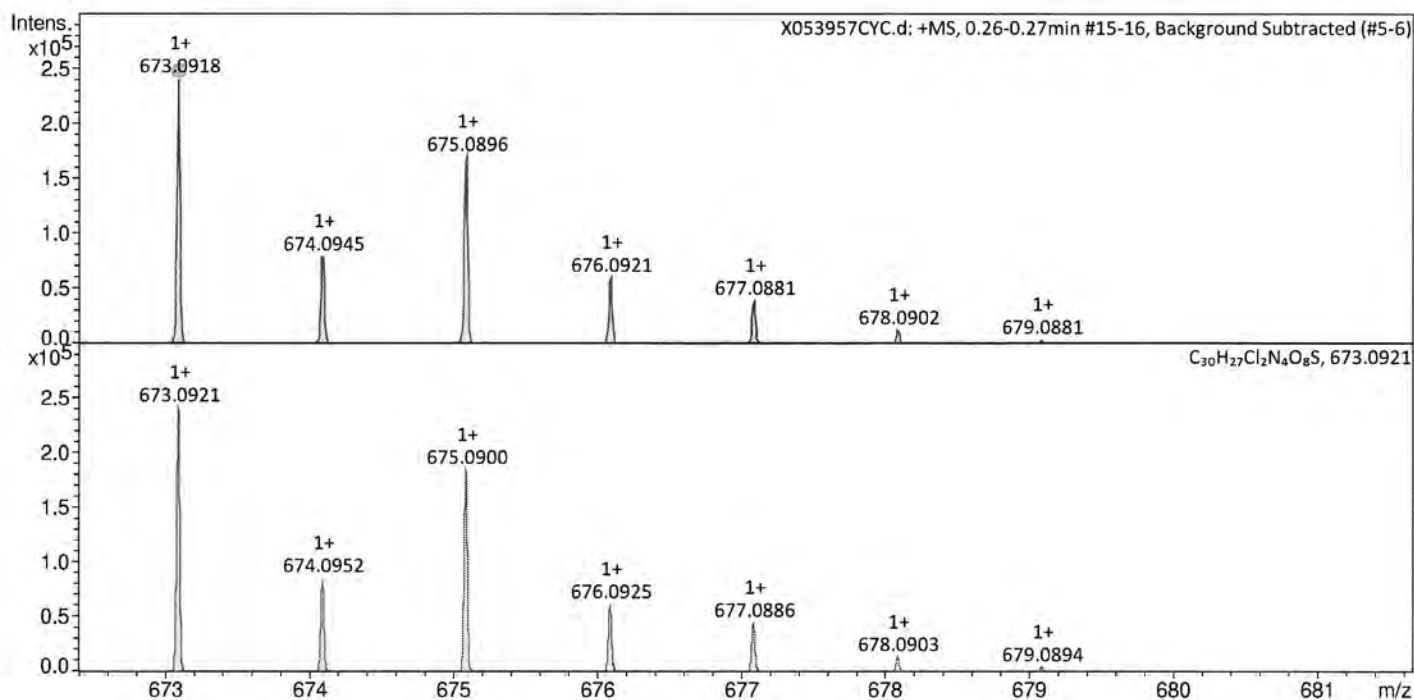

| Meas. m/z  | z  | # | Ion Formula      | m/z        | err [ppm] | mSigma | rdb  | e <sup>-</sup> | Conf |
|------------|----|---|------------------|------------|-----------|--------|------|----------------|------|
| 183.020901 | 1+ | 1 | C9H8ClO2         | 183.020734 | -0.9      | 6.2    | 6.0  | even           |      |
| 260.032370 | 1+ | 1 | C10H11ClNO5      | 260.032027 | -1.3      | 24.8   | 6.0  | even           |      |
| 356.024005 | 2+ | 1 | C30H26CaCl2N4O8S | 356.023167 | -2.4      | 22.5   | 20.0 | even           |      |
| 365.028941 | 2+ | 1 | C30H28CaCl2N4O9S | 365.028449 | -1.3      | 11.3   | 19.0 | even           |      |
| 627.098713 | 1+ | 1 | C30H27Cl2N3O6S   | 627.099213 | 0.8       | 51.2   | 18.5 | odd            |      |
| 673.091815 | 1+ | 1 | C29H31Cl2O12S    | 673.090779 | -1.5      | 24.8   | 14.0 | even           |      |
|            | 1+ | 2 | C30H27Cl2N4O8S   | 673.092117 | 0.4       | 26.4   | 19.0 | even           |      |
| 695.073430 | 1+ | 1 | C30H26Cl2N4NaO8S | 695.074061 | 0.9       | 23.5   | 19.0 | even           |      |

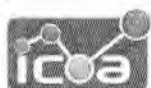

| Meas. m/z | z  | # | Ion Formula                                                         | m/z        | err [ppm] | mSigma | rdb  | e <sup>-</sup> | Conf |
|-----------|----|---|---------------------------------------------------------------------|------------|-----------|--------|------|----------------|------|
|           | 1+ | 2 | C <sub>29</sub> H <sub>30</sub> Cl <sub>2</sub> NaO <sub>12</sub> S | 695.072723 | -1.0      | 23.8   | 14.0 |                | even |

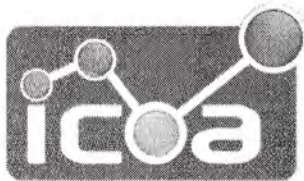

# Spectrométrie de Masse

## Demande d'analyse HRMS

### High-Resolution Mass Spectrometry analysis request form

|                                                                                                           |                                                                                                                               |                                                                                        |
|-----------------------------------------------------------------------------------------------------------|-------------------------------------------------------------------------------------------------------------------------------|----------------------------------------------------------------------------------------|
| Demandeur (Nom+Prénom) :<br><b>Sava Alexandru</b><br>(Submitter's name) : <b>AS</b>                       | Tél :<br>(Phone)                                                                                                              | Mail :<br>(E-mail)                                                                     |
| Nom de l'échantillon : <b>AS 393</b><br>(Sample name) <b>8m</b>                                           | Confirmation :<br><input checked="" type="checkbox"/> Structure connue<br>(Known structure)                                   | Identification :<br><input type="checkbox"/> Structure inconnue<br>(Unknown structure) |
| Formule brute : <b>C<sub>30</sub>H<sub>26</sub>BrClN<sub>4</sub>O<sub>8</sub>S</b><br>(Molecular formula) | Structure :<br>(Chemical structure)                                                                                           |                                                                                        |
| Masse moléculaire : <b>717.97</b><br>(Molecular weight)                                                   |                                                                                                                               |                                                                                        |
| Solvant conseillé : <b>Acetone</b><br>(Recommended solvent)                                               | Chemical Formula: <b>C<sub>30</sub>H<sub>26</sub>BrClN<sub>4</sub>O<sub>8</sub>S</b><br>Molecular Weight: <b>717.97</b>       |                                                                                        |
| Concentration ou masse :<br>(Concentration or weight)<br><b>1 mg / 1mL</b>                                | Remarques (conservation, solvants déconseillés, toxicité...) :<br>(Notes: storage, sample handling precautions, toxicity ...) |                                                                                        |
| Responsable : <b>Sylvain Routier</b><br>(Supervisor)                                                      | Date : <b>10.12.2019</b><br>(Date)                                                                                            | Bon pour accord :<br>(Signed as agreed)                                                |

### Partie réservée au service (For MS facility use only)

|                                                             |                                                   |                                    |
|-------------------------------------------------------------|---------------------------------------------------|------------------------------------|
| Position sur le rack :<br>(Position on the rack) <b>GD1</b> | Nom du fichier :<br>(File name) <b>X053956CYC</b> | Date :<br>(Date) <b>10/12/2019</b> |
| Remarques :<br>(Comments and suggestions)                   |                                                   |                                    |

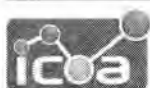

Analysis Info

Sample Name **AS393**  
Analysis Name X053956CYC.d

Acquisition Date 11/12/2019 18:06:20  
Instrument / Ser# maXis 255552.00086  
Method Positif.m

Acquisition Parameter

|             |          |                       |            |                |           |
|-------------|----------|-----------------------|------------|----------------|-----------|
| Source Type | ESI      | Ion Polarity          | Positive   | Set Nebulizer  | 0.6 Bar   |
| Scan Begin  | 50 m/z   | Set Capillary         | 4500 V     | Set Dry Heater | 200 °C    |
| Scan End    | 2500 m/z | Set Collision Cell RF | 1800.0 Vpp | Set Dry Gas    | 7.0 l/min |

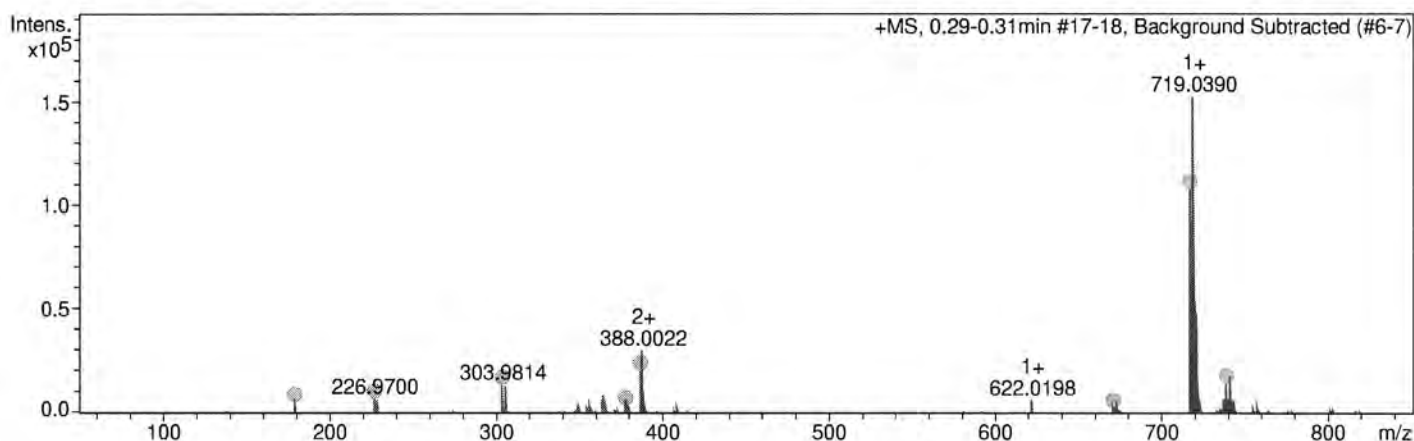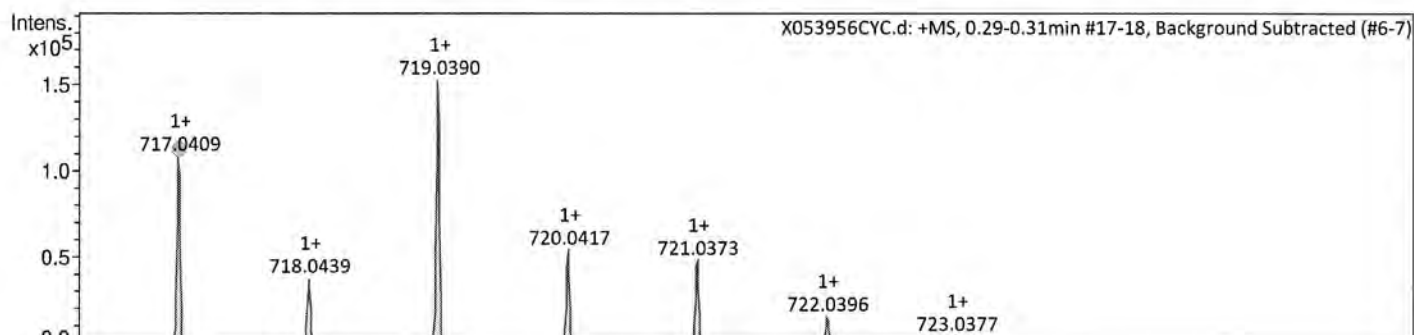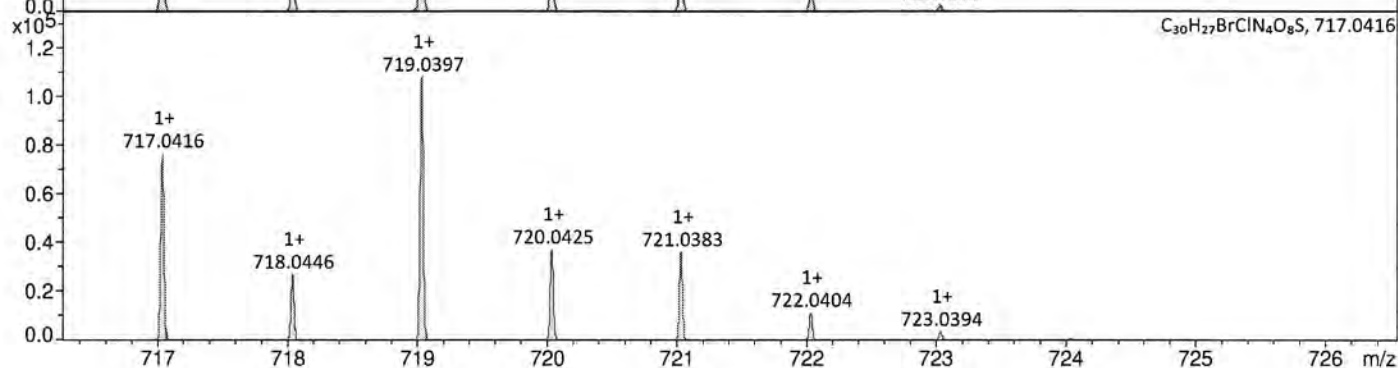

| Meas. m/z  | z  | # | Ion Formula       | m/z        | err [ppm] | mSigma | rdb  | e <sup>-</sup> | Conf |
|------------|----|---|-------------------|------------|-----------|--------|------|----------------|------|
| 179.070251 | 1+ | 1 | C10H11O3          | 179.070271 | 0.1       | 7.0    | 6.0  | even           |      |
| 226.970029 | 1+ | 1 | C9H8BrO2          | 226.970218 | 0.8       | 26.4   | 6.0  | even           |      |
| 303.981410 | 1+ | 1 | C10H11BrNO5       | 303.981511 | 0.3       | 18.8   | 6.0  | even           |      |
| 377.997802 | 2+ | 1 | C30H26BrCaClN4O8S | 377.997909 | 0.3       | 53.8   | 20.0 | even           |      |
|            | 2+ | 2 | C29H30BrCaClO12S  | 377.997240 | -1.5      | 59.9   | 15.0 | even           |      |
| 387.003215 | 2+ | 1 | C30H28BrCaClN4O9S | 387.003192 | -0.1      | 16.6   | 19.0 | even           |      |
|            | 2+ | 2 | C29H32BrCaClO13S  | 387.002523 | -1.8      | 17.5   | 14.0 | even           |      |
| 671.047665 | 1+ | 1 | C30H27BrClN3O6S   | 671.048698 | 1.5       | 70.0   | 18.5 | odd            |      |

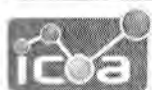

| Meas. m/z  | z  | # | Ion Formula       | m/z        | err [ppm] | mSigma | rdb  | e <sup>-</sup> | Conf |
|------------|----|---|-------------------|------------|-----------|--------|------|----------------|------|
| 717.040884 | 1+ | 1 | C30H27BrClN4O8S   | 717.041601 | 1.0       | 8.4    | 19.0 | even           |      |
|            | 1+ | 2 | C29H31BrClO12S    | 717.040264 | -0.9      | 15.2   | 14.0 | even           |      |
| 739.022168 | 1+ | 1 | C30H26BrClN4NaO8S | 739.023545 | 1.9       | 42.7   | 19.0 | even           |      |
|            | 1+ | 2 | C29H30BrClNaO12S  | 739.022208 | 0.1       | 45.2   | 14.0 | even           |      |

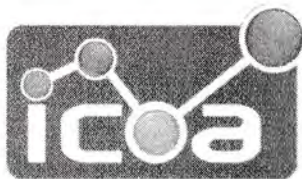

# Spectrométrie de Masse

## Demande d'analyse HRMS

### High-Resolution Mass Spectrometry analysis request form

|                                                                                                                               |                                                                                                                                                                                                     |                                                                                        |
|-------------------------------------------------------------------------------------------------------------------------------|-----------------------------------------------------------------------------------------------------------------------------------------------------------------------------------------------------|----------------------------------------------------------------------------------------|
| Demandeur (Nom+Prénom) :<br><b>Sava Alexandru</b><br>(Submitter's name) : <b>AS</b>                                           | Tél :<br>(Phone)                                                                                                                                                                                    | Mail :<br>(E-mail)                                                                     |
| Nom de l'échantillon : <b>AS 395</b><br>(Sample name) <b>8n</b>                                                               | Confirmation :<br><input checked="" type="checkbox"/> Structure connue<br>(Known structure)                                                                                                         | Identification :<br><input type="checkbox"/> Structure inconnue<br>(Unknown structure) |
| Formule brute : <b>C<sub>29</sub>H<sub>25</sub>ClN<sub>4</sub>O<sub>7</sub>S</b><br>(Molecular formula)                       | Structure :<br>(Chemical structure)                                                                                                                                                                 |                                                                                        |
| Masse moléculaire : <b>609.05</b><br>(Molecular weight)                                                                       | 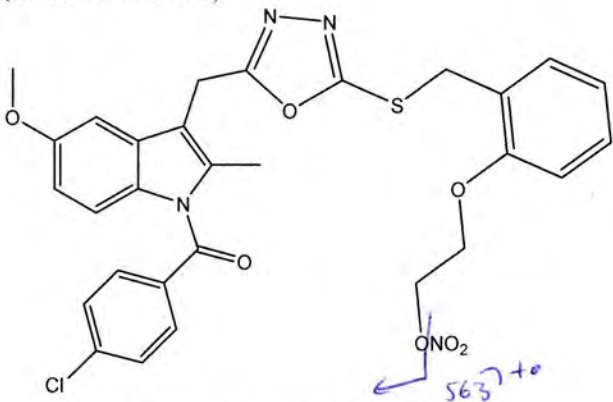 <p>Chemical Formula: C<sub>29</sub>H<sub>25</sub>ClN<sub>4</sub>O<sub>7</sub>S<br/>Molecular Weight: 609.05</p> |                                                                                        |
| Solvant conseillé : <b>Acetone</b><br>(Recommended solvent)                                                                   |                                                                                                                                                                                                     |                                                                                        |
| Concentration ou masse :<br>(Concentration or weight)<br><b>1 mg / 1mL</b>                                                    |                                                                                                                                                                                                     |                                                                                        |
| Remarques (conservation, solvants déconseillés, toxicité...) :<br>(Notes: storage, sample handling precautions, toxicity ...) |                                                                                                                                                                                                     |                                                                                        |
| Responsable : <b>Sylvain Routier</b><br>(Supervisor)                                                                          | Date : <b>10.12.2019</b><br>(Date)                                                                                                                                                                  | Bon pour accord :<br>(Signed as agreed)                                                |

### Partie réservée au service (For MS facility use only)

|                                                              |                                                   |                                    |
|--------------------------------------------------------------|---------------------------------------------------|------------------------------------|
| Position sur le rack :<br>(Position on the rack) <b>GE11</b> | Nom du fichier :<br>(File name) <b>X053978CYC</b> | Date :<br>(Date) <b>10/12/2019</b> |
| Remarques :<br>(Comments and suggestions)                    |                                                   |                                    |

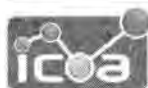

Analysis Info

Sample Name **AS395**  
Analysis Name X053978CYC.d

Acquisition Date 11/12/2019 20:03:05  
Instrument / Ser# maXis 255552.00086  
Method Positif.m

Acquisition Parameter

|             |          |                       |            |                |           |
|-------------|----------|-----------------------|------------|----------------|-----------|
| Source Type | ESI      | Ion Polarity          | Positive   | Set Nebulizer  | 0.6 Bar   |
| Scan Begin  | 50 m/z   | Set Capillary         | 4500 V     | Set Dry Heater | 200 °C    |
| Scan End    | 2500 m/z | Set Collision Cell RF | 1800.0 Vpp | Set Dry Gas    | 7.0 l/min |

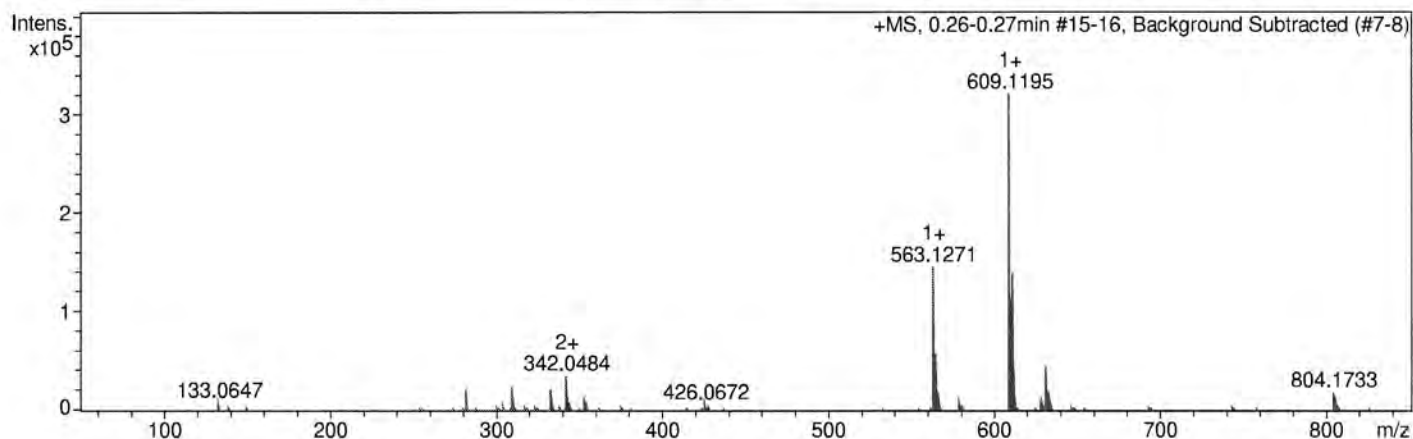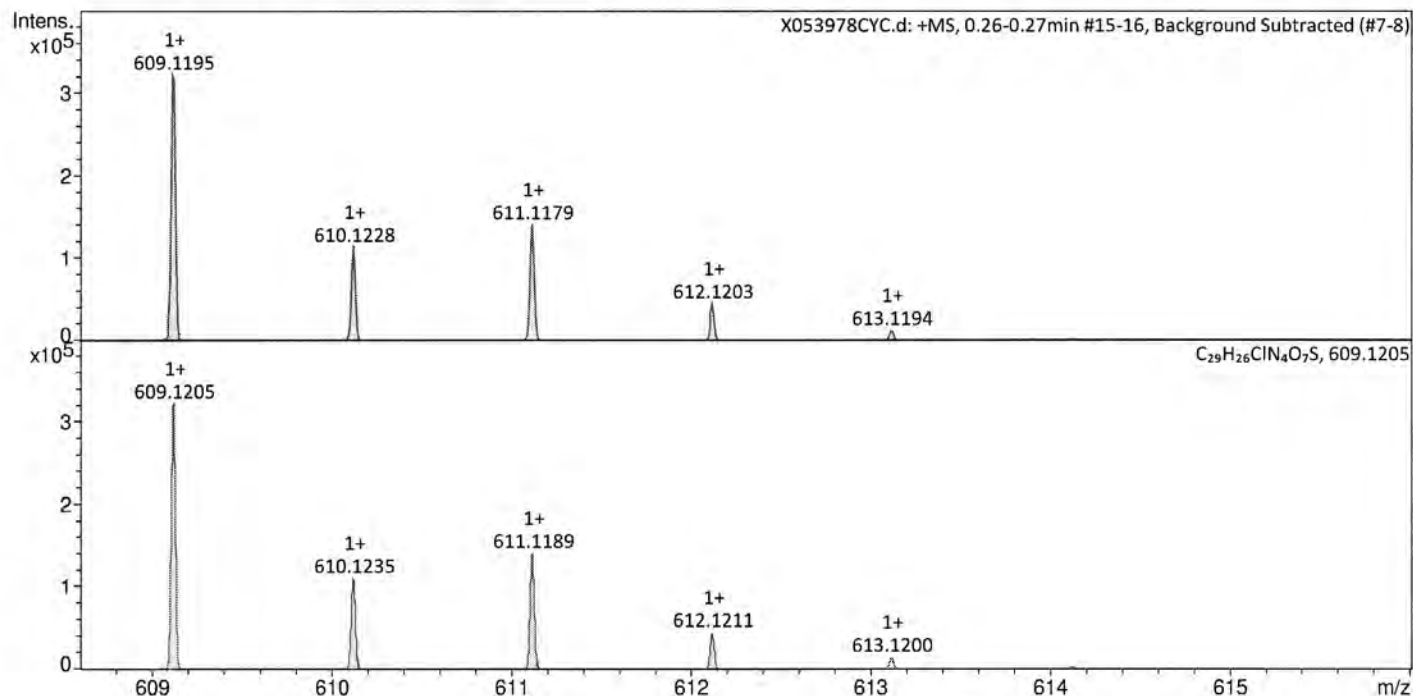

| Meas. m/z  | z  | # | Ion Formula                                                         | m/z        | err [ppm] | mSigma | rdb  | e <sup>-</sup> | Conf |
|------------|----|---|---------------------------------------------------------------------|------------|-----------|--------|------|----------------|------|
| 333.043015 | 2+ | 1 | C <sub>29</sub> H <sub>27</sub> CaIN <sub>4</sub> O <sub>8</sub> S  | 333.042653 | -1.1      | 12.9   | 19.0 | even           |      |
| 342.048403 | 2+ | 1 | C <sub>29</sub> H <sub>29</sub> CaIN <sub>4</sub> O <sub>9</sub> S  | 342.047936 | -1.4      | 47.8   | 18.0 | even           |      |
| 563.127138 | 1+ | 1 | C <sub>29</sub> H <sub>26</sub> CIN <sub>3</sub> O <sub>5</sub> S   | 563.127621 | 0.9       | 16.5   | 18.5 | odd            |      |
| 609.119494 | 1+ | 1 | C <sub>29</sub> H <sub>26</sub> CIN <sub>4</sub> O <sub>7</sub> S   | 609.120524 | 1.7       | 4.7    | 19.0 | even           |      |
|            | 1+ | 2 | C <sub>28</sub> H <sub>30</sub> ClO <sub>11</sub> S                 | 609.119187 | -0.5      | 14.3   | 14.0 | even           |      |
| 631.101636 | 1+ | 1 | C <sub>29</sub> H <sub>25</sub> CIN <sub>4</sub> NaO <sub>7</sub> S | 631.102469 | 1.3       | 7.6    | 19.0 | even           |      |
|            | 1+ | 2 | C <sub>28</sub> H <sub>29</sub> CINaO <sub>11</sub> S               | 631.101131 | -0.8      | 17.0   | 14.0 | even           |      |
